# Supplementary material for: A PPP-type pseudophosphatase is required for the maintenance of basal complex integrity in Plasmodium falciparum
Source: PubMed Central journal article supplement (PMC10317984; doi:10.1038/s41467-023-39435-z), 2023-07-03
Supplement: 41467_2023_39435_MOESM1_ESM.pdf [file 41467_2023_39435_MOESM1_ESM.pdf]

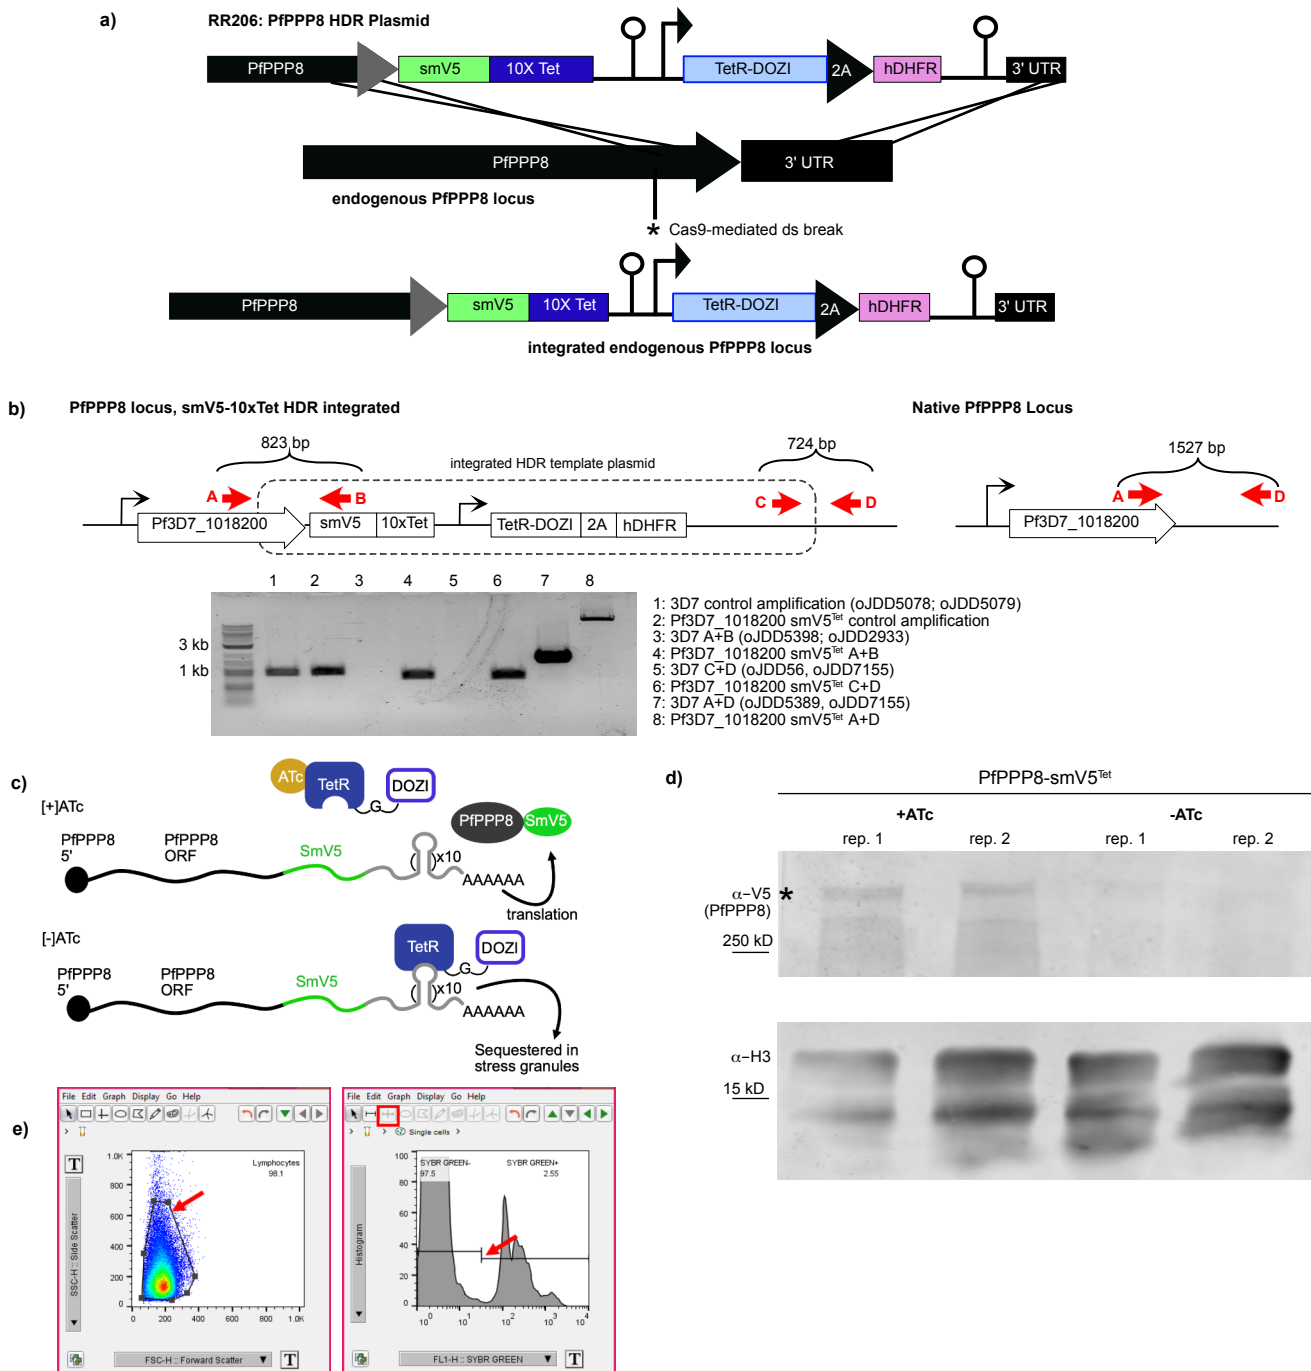

### Supplementary Fig. 1 | PfPPP8-smV5<sup>int</sup> targeting construct and knockdown efficiency

**a**, Schematic of PfPPP8 targeting construct to generate PfPPP8-smV5<sup>int</sup>, the location of its modification, and of the endogenous PfPPP8 locus following integration of construct. **b**, For the PfPPP8 locus in the PfPPP8-smV5<sup>int</sup> line, schematic showing the locus upon HDR integration and the native locus. Below, PCR amplifications of bracketed regions utilizing primers labelled in red; reactions labelled to the right of the image. Amplifications in the modified line are run adjacent to the same reaction in the parental (3D7) line. **c**, Schematic of TetR-DOZI system for translational repression of PfPPP8. **d**, Immunoblot of PfPPP8-smV5<sup>int</sup> protein levels + and -ATc; 2 biological replicates were run on the same gel. Asterisk indicates primary translation product of PfPPP8-smV5<sup>int</sup>. **e**, gating strategy for flow cytometry data collected for figure 1b. First gating utilized forward and side scatter to identify individual RBCs; this population was then gated based on SYBR Green expression; above 10<sup>1</sup> was considered SYBR Green positive.

PfPPP8-sufficient

PfPPP8-deficient

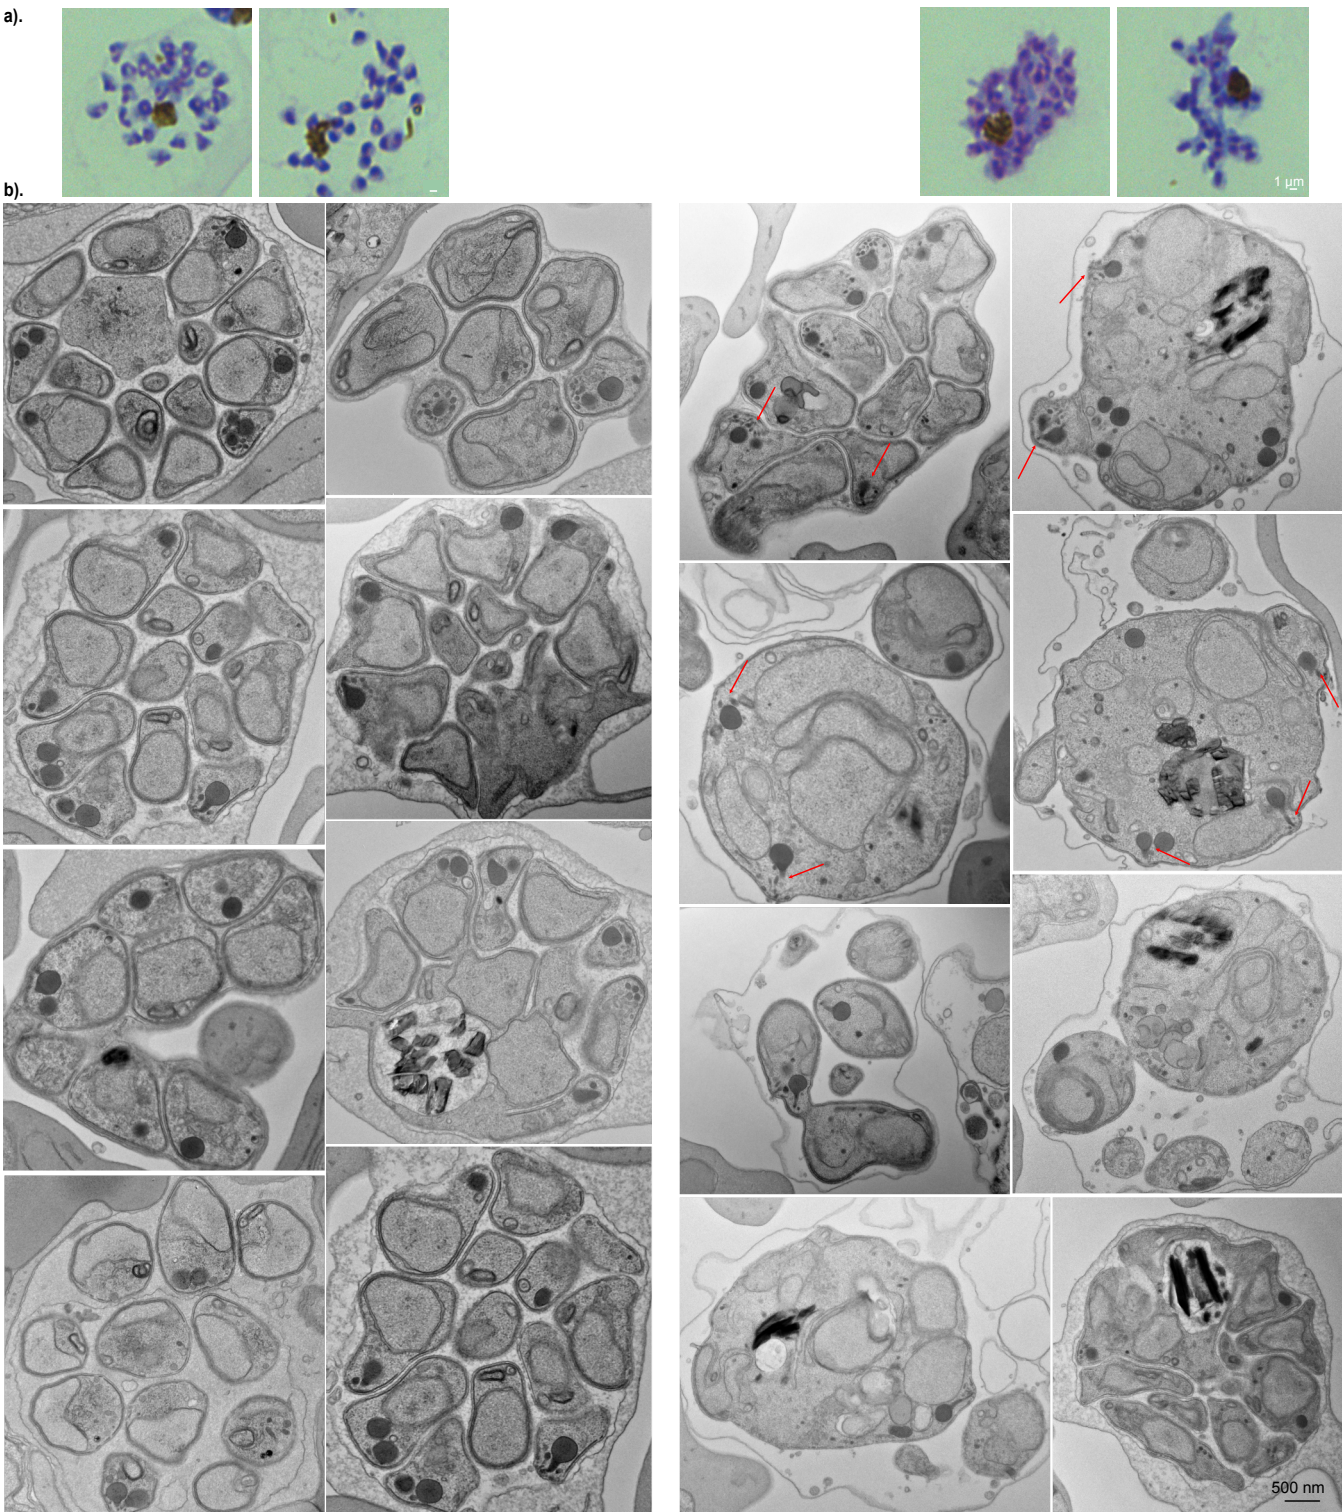

### Supplementary Figure 2 | Additional characterization of PfPPP8-deficient phenotype – broad segmentation defects

**a.** Comparison of merozoite segmentation and individualization in PfPPP8-sufficient (left) and deficient (right) E64-stalled parasites via Field's stain. **b.** Extra examples of PfPPP8-sufficient (left column) compared to -deficient (right column) fully segmented (E64-stalled) parasites via transmission electron microscopy. PfPPP8-deficient parasites display defective segmentation resulting in few merozoites of vastly different sizes, and inability of merozoites to separate from each other indicated by presence of multiple apical ends in a single merozoite (red arrows point to apical organelles in images where more than one set of apical organelles is visible in one merozoite).



## a) slide-based immunofluorescence

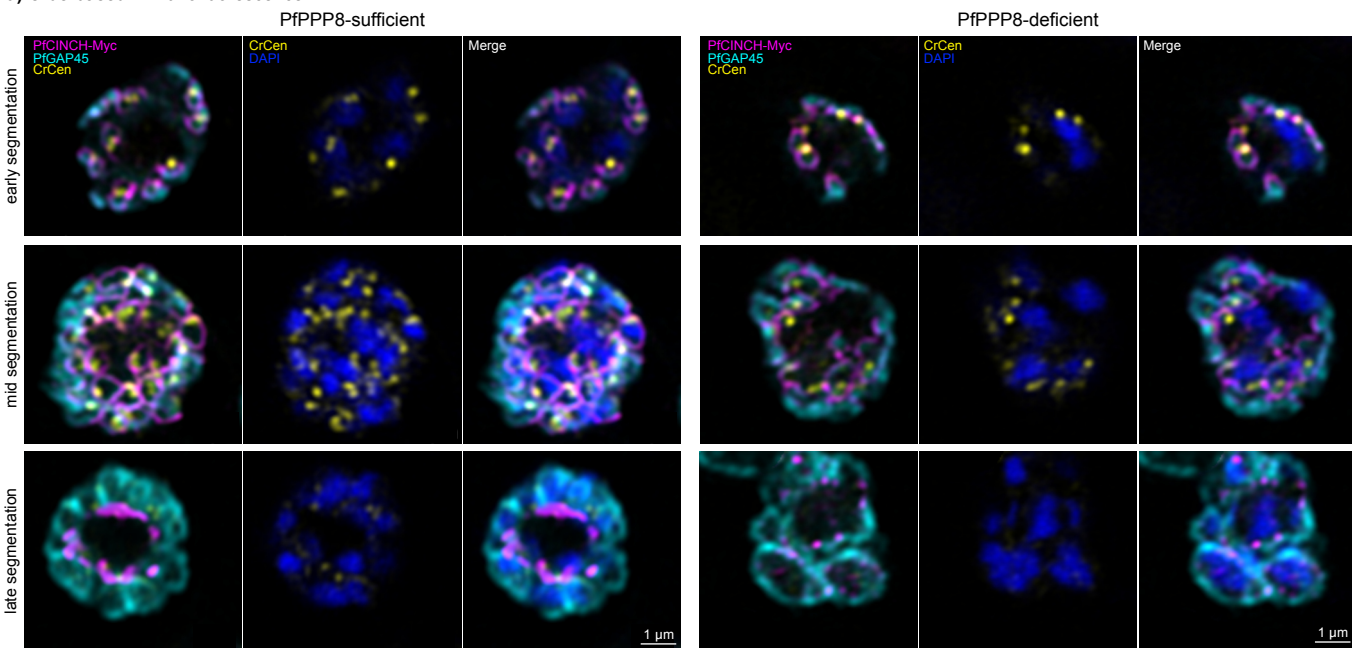

## b) batch staining immunofluorescence

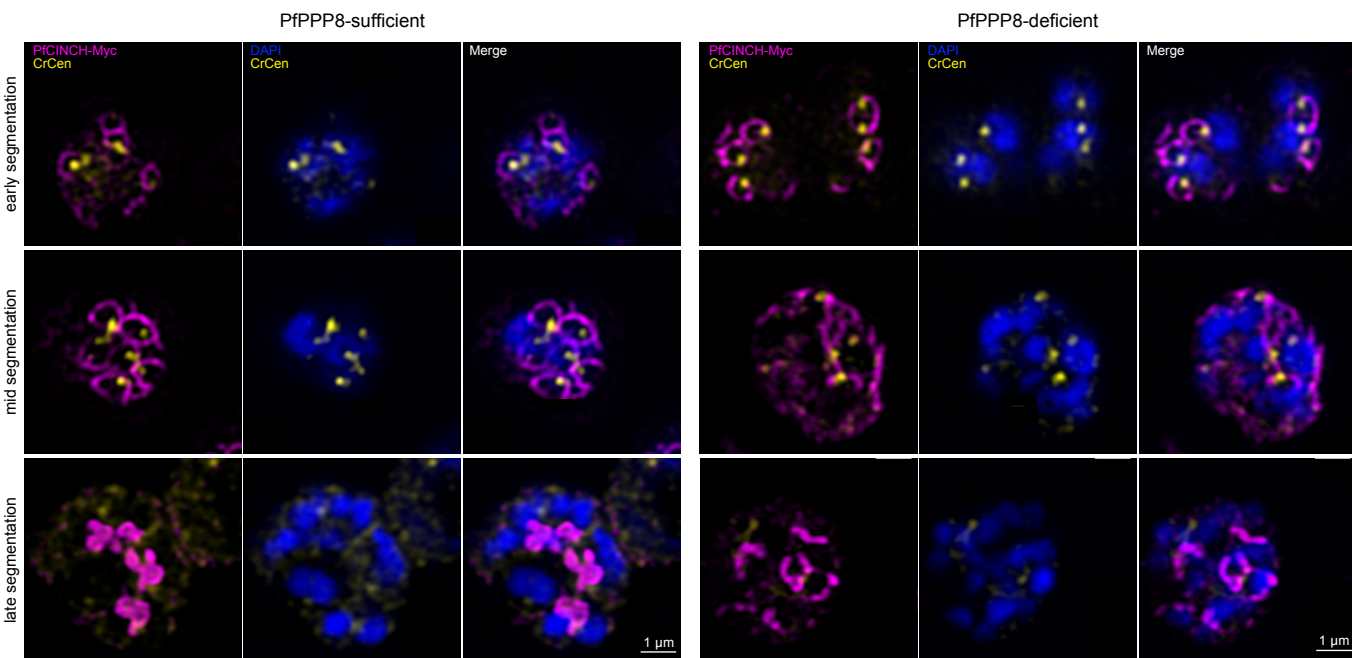

**Supplementary Figure 3 | Additional characterization of PfPPP8-deficient phenotype – centrin localization and phenotype**  
**a**, Comparison of centrin phenotypes (CrCen primary antibody, yellow) in relation to the basal complex (PfCINCH-smMyc, magenta) and inner membrane complex (PfGAP45, cyan) in early, mid, and late segmentation PfPPP8-sufficient (left) and -deficient (right) parasites by slide IFA. **b**, Comparison of centrin phenotypes (CrCen primary antibody, yellow) in relation to the basal complex (PfCINCH-smMyc, magenta) in early, mid, and late segmentation PfPPP8-sufficient (left) and -deficient (right) parasites by batch-staining IFA.

PfPPP8-smV5<sup>Tet</sup>; PfCINCH-smMyc

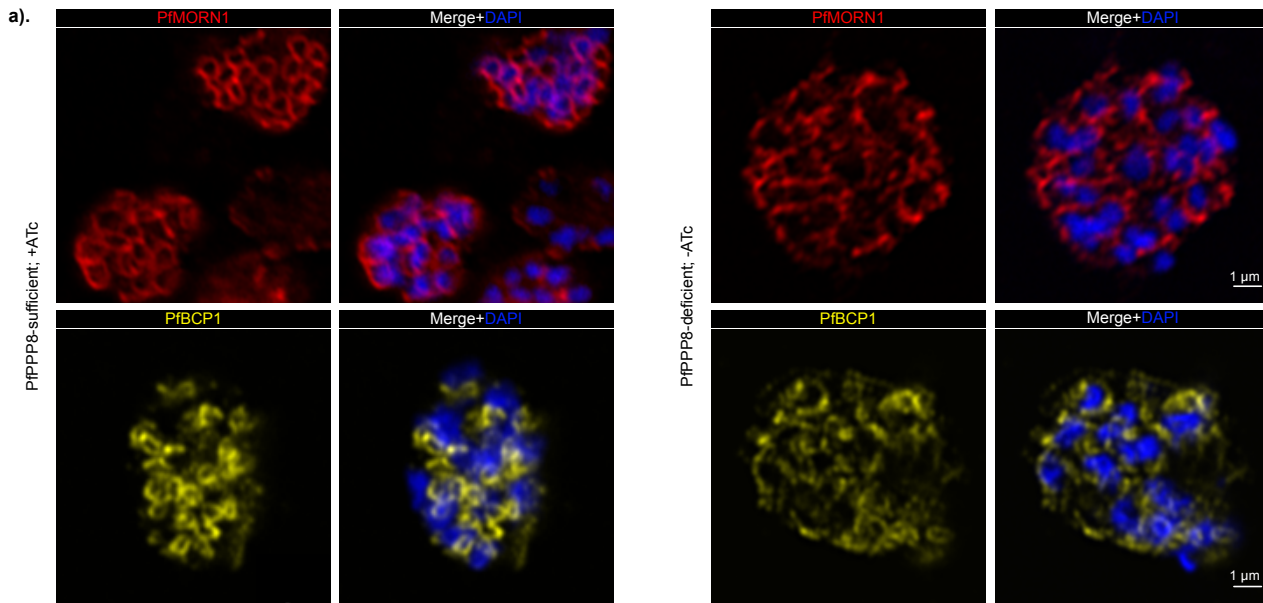

PfPPP8-smV5<sup>Tet</sup>; PfBLEB-HaloTag

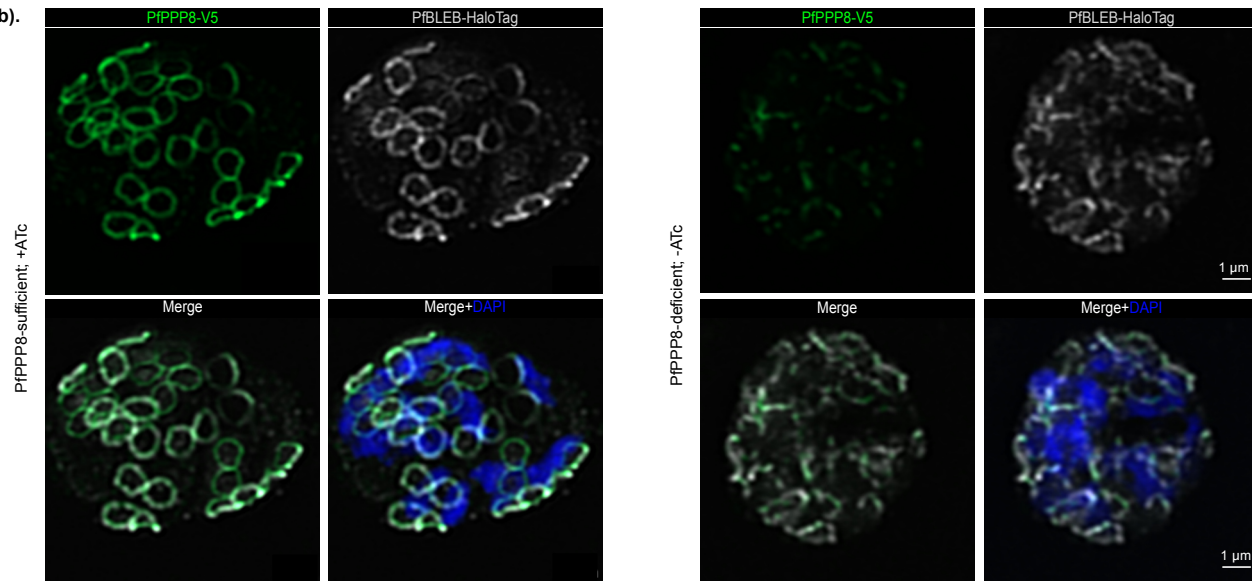

**Supplementary Figure 4 | Initial characterization of PfPPP8-deficient basal complex**

**a**, Comparison of basal complex phenotypes using primary antibodies against PfBCP1 (yellow) and PfMORN1 (red) in PfPPP8-sufficient (left) and -deficient (right) parasites by IFA. **b**, Comparison of basal complex phenotype (PfBLEB-HaloTag) in the PfPPP8-smV5<sup>Tet</sup>-PfBLEB-HaloTag line.



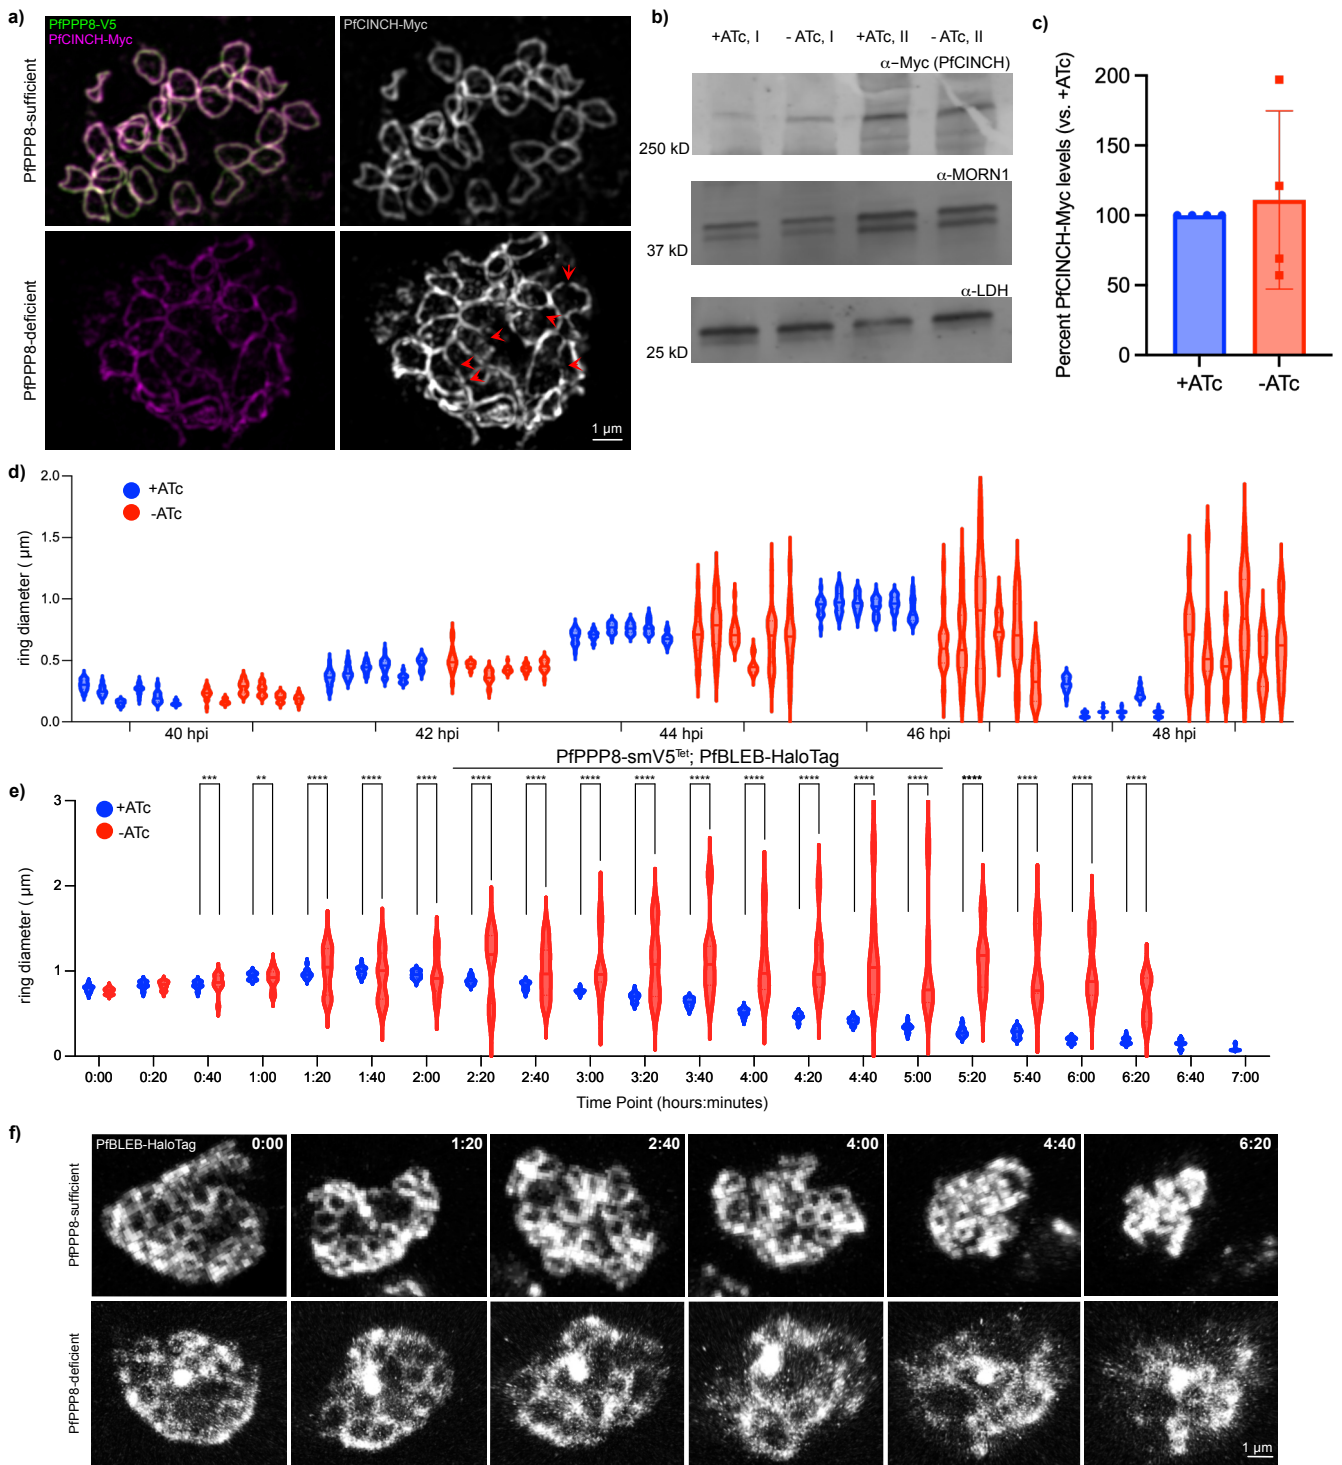

**Supplementary Fig. 5 | Additional data on PfPPP8-deficient basal complex integrity and stability during segmentation**

**a**, Comparison of basal complex phenotype (PfCINCH-smMyc) in PfPPP8-sufficient and -deficient parasites by IFM using 3D-Structured Illumination Microscopy. Red arrows point to breakage points in the basal complex. **b**, Immunoblot of basal complex protein levels (PfCINCH-smMyc and PfMORN1) in PfPPP8-sufficient and PfPPP8-deficient parasites; two replicates were run on the same gel. **c**, Quantification of relative PfCINCH protein levels in PfPPP8-deficient compared to PfPPP8-sufficient conditions (data presented as mean values  $\pm$  SD; n=4 biologically independent samples). **d**, Visualization of 6 individual parasites' basal complex diameter measurements of each condition and time point from Fig. 3b data (n=10-30 rings each). **e**, Quantification of basal complex 'ring' diameter in a single PfPPP8-deficient and PfPPP8-sufficient parasite over the course of imaging; one-sided F-test for equality of variances (0:40: p=0.0006; 1:00: p=0.0013; 1:20-onward: p<0.0001, n=10-25 BC rings). Time point = time after initiation of imaging. **f**, Selected time points (time represented as hours:minutes on each image) showing basal complex phenotype (PfBLEB-HaloTag) in the same parasite (PfPPP8-sufficient and -deficient) over time (see Supplementary Videos 5, 6).

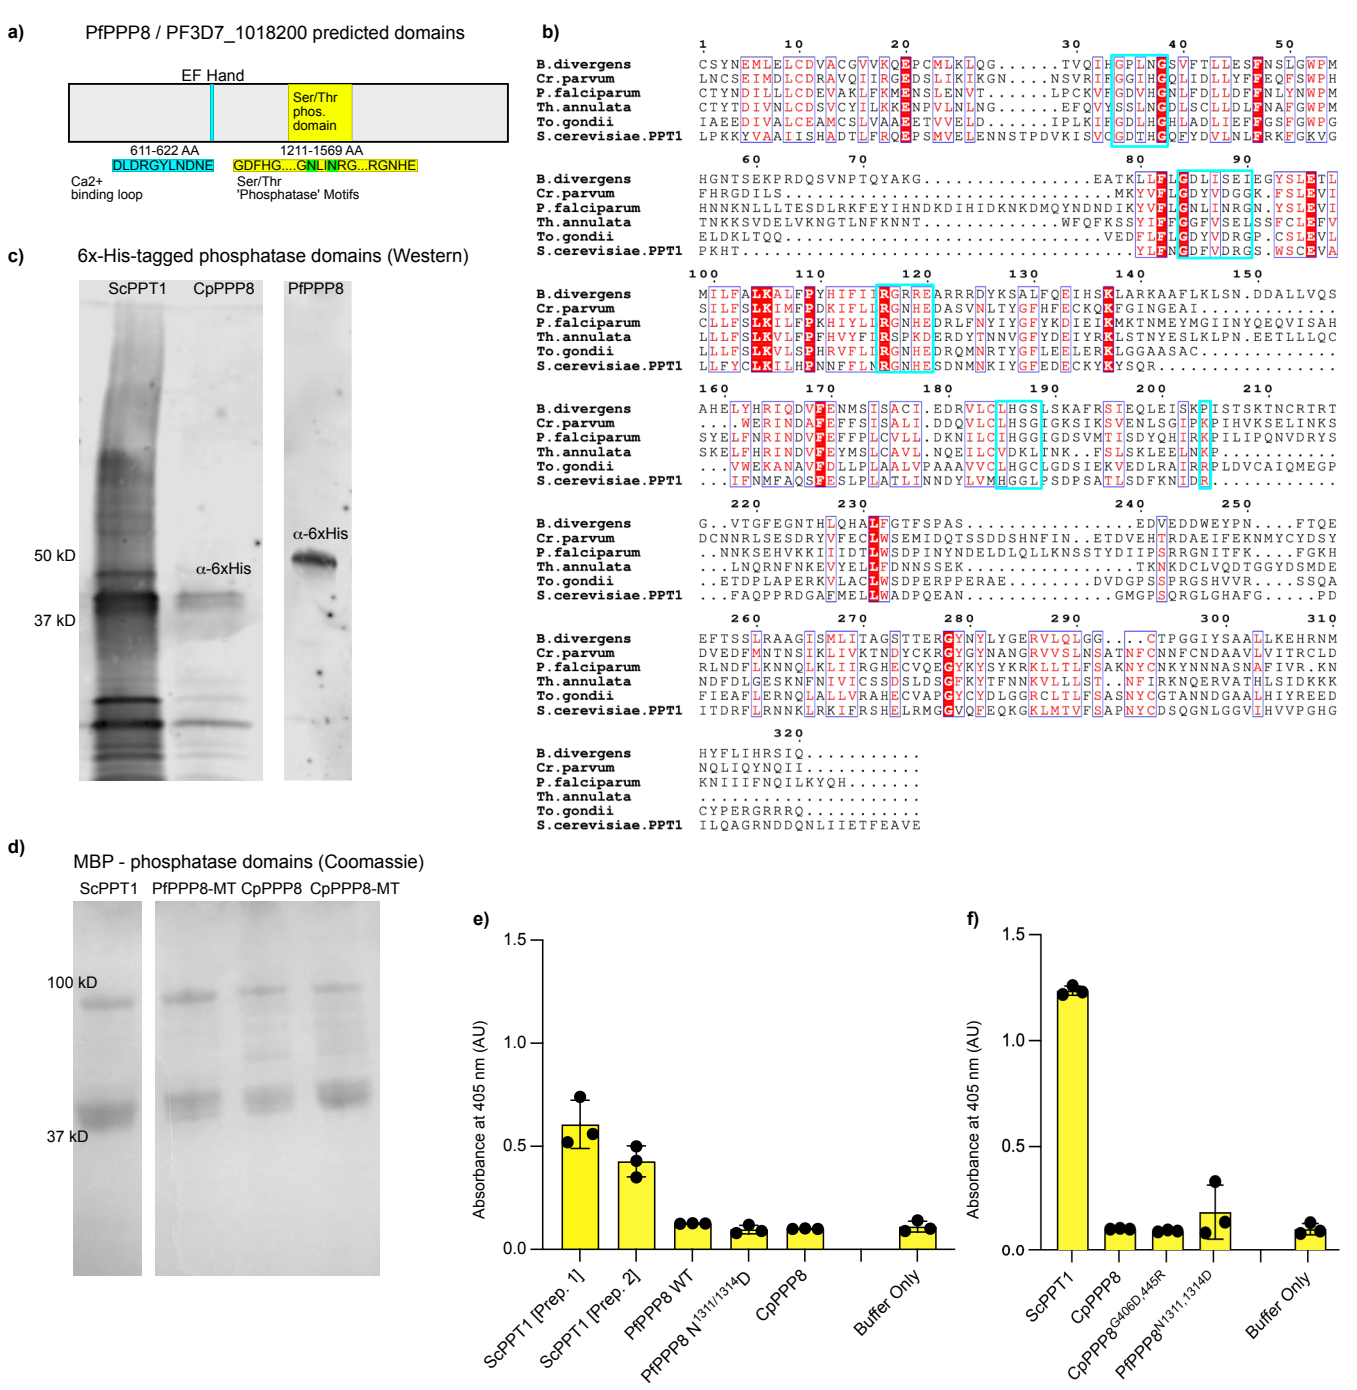

**Supplementary Fig. 6 | Additional data on PfPPP8 and homologs' conserved sequences and phosphatase activity of recombinant proteins.**

**a.** Schematic of domains identified bioinformatically in PfPPP8. **b.** Sequence alignment generated by MegaX, prepared for publication using ESPript3 of predicted phosphatase domains of PfPPP8 and homologs (*T. annulata*, *C. parvum*, *B. divergens*, and *To. gondii*) plus serine-threonine protein phosphatase *S. cerevisiae* PPT1. Catalytically important motifs boxed in cyan. **c.** Immunoblot of recombinant 6xHis-tagged phosphatase domains of PPT1, PfPPP8, and *C. parvum* PPP8. **d.** Coomassie staining of recombinant maltose-binding protein (MBP)-tagged PfPPP8<sup>N1311,1314D</sup>, CpPPP8, CpPPP8<sup>G468D,445R</sup>, and ScPPT1. Expected size of fusion protein for all ~90 kD; of *E. coli* MBP ~44 kD. **e.** pNPP dephosphorylation assay for 6xHis-recombinant phosphatase domains. **f.** pNPP dephosphorylation assay for MBP-recombinant phosphatase domains (for **e** and **f**, n=3 samples run in parallel, representative of multiple biological replicates; data presented as mean values ± SD).

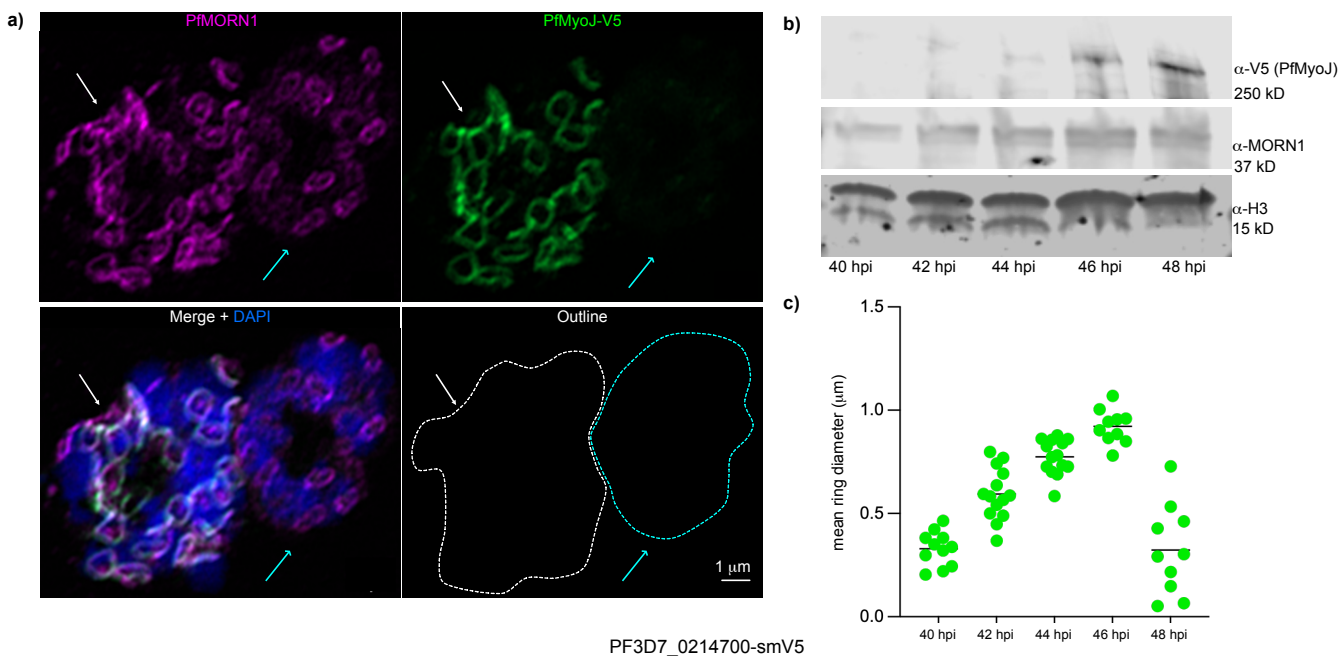

PF3D7\_0214700-smV5

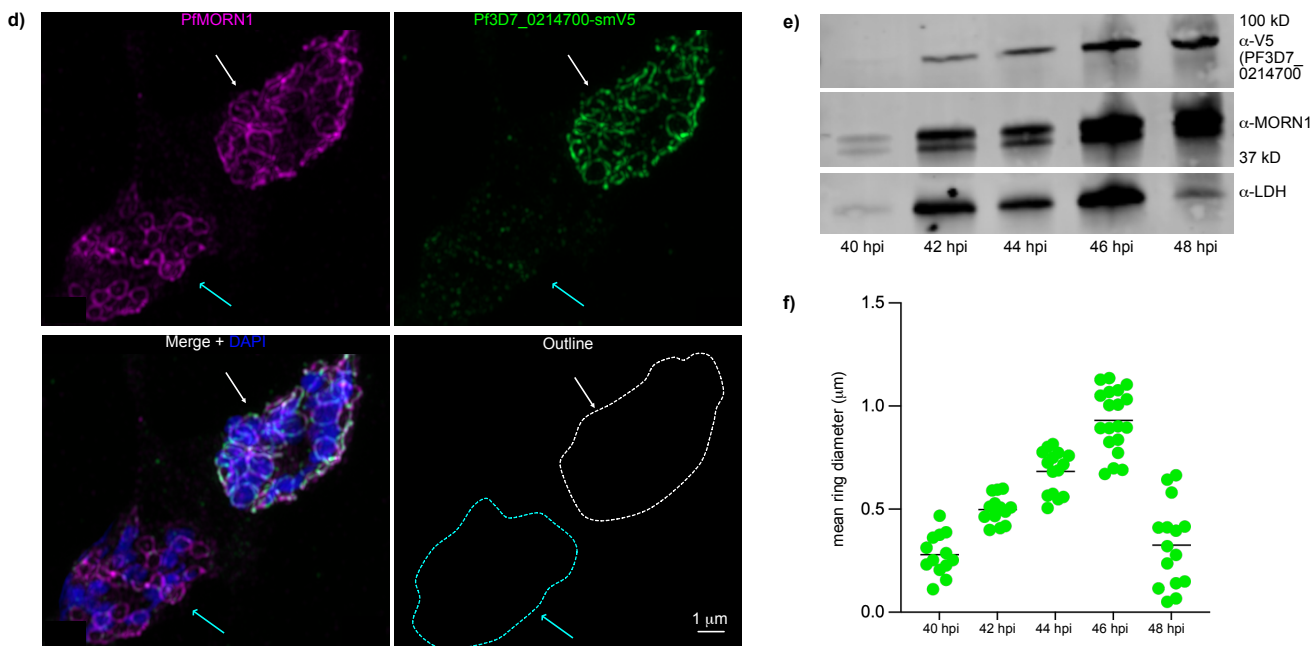

### Supplementary Figure 7 | Additional data on PfMyoJ and PF3D7\_0214700 temporal localizations

**a**, Comparison of PfMyoJ and PfMORN1 temporal localization in adjacent earlier and later schizonts of a mixed population by IFA. Earlier schizont indicated with a cyan arrow and a cyan-dashed outline in the fourth panel (defining the boundaries of each parasite). Later schizont indicated with a white arrow and a white-dashed outline in the fourth panel. **b**, Immunoblot comparing PfMyoJ and PfMORN1 protein levels in a tightly synchronized population, with samples taken every 2 hours. **c**, Quantification of mean BC ring diameter at each time point represented in **b**;  $n = 10$  schizonts per time point. **d**, Comparison of PF3D7\_0214700 and PfMORN1 temporal localization in adjacent earlier and later schizonts of a mixed population by IFA. Earlier schizont indicated with a cyan arrow and a cyan-dashed outline in the fourth panel (defining the boundaries of each parasite). Later schizont indicated with a white arrow and a white-dashed outline in the fourth panel. **e**, Immunoblot comparing PF3D7\_0214700 and PfMORN1 protein levels in a tightly synchronized population, with samples taken every 2 hours. **f**, Quantification of mean BC ring diameter at each time point represented in **e**;  $n = 10$  schizonts per time point.



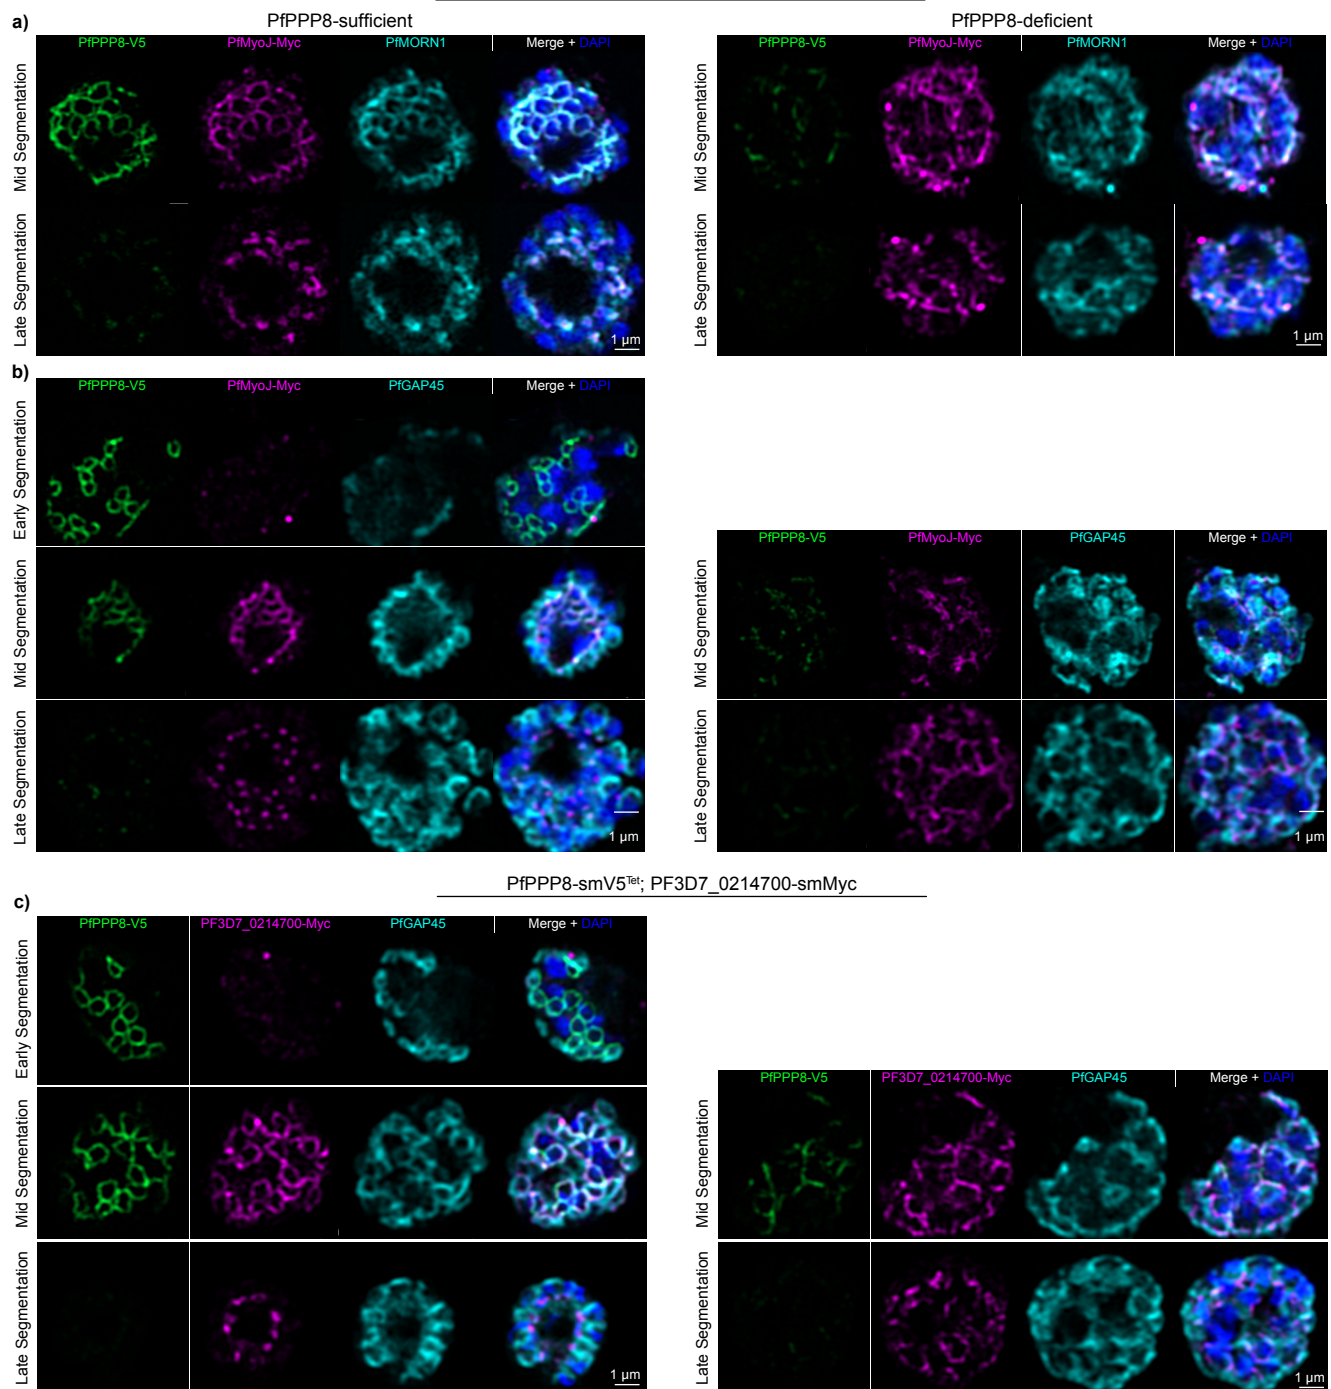

**Supplementary Figure 8 | PfMyoJ and PF3D7\_0214700 are recruited to the basal complex even in PfPPP8-deficient parasites.**

**a.** Comparison of PfMyoJ (PfMyoJ-smMyc) and PfMORN1 phenotypes in PfPPP8-sufficient (left) and -deficient (right) parasites by IFA, using the PfPPP8-smV5<sup>Tet</sup>; PfMyoJ-smMyc line. **b.** Comparison of PfMyoJ (PfMyoJ-smMyc) and PfGAP45 phenotypes in PfPPP8-sufficient (left) and -deficient (right) parasites by IFA, using the PfPPP8-smV5<sup>Tet</sup>; PfMyoJ-smMyc line. **c.** Comparison of PF3D7\_0214700 (PF3D7\_0214700-smMyc) and PfGAP45 phenotypes in PfPPP8-sufficient (left) and -deficient (right) parasites by IFA, using the PfPPP8-smV5<sup>Tet</sup>; PF3D7\_0214700-smMyc line.

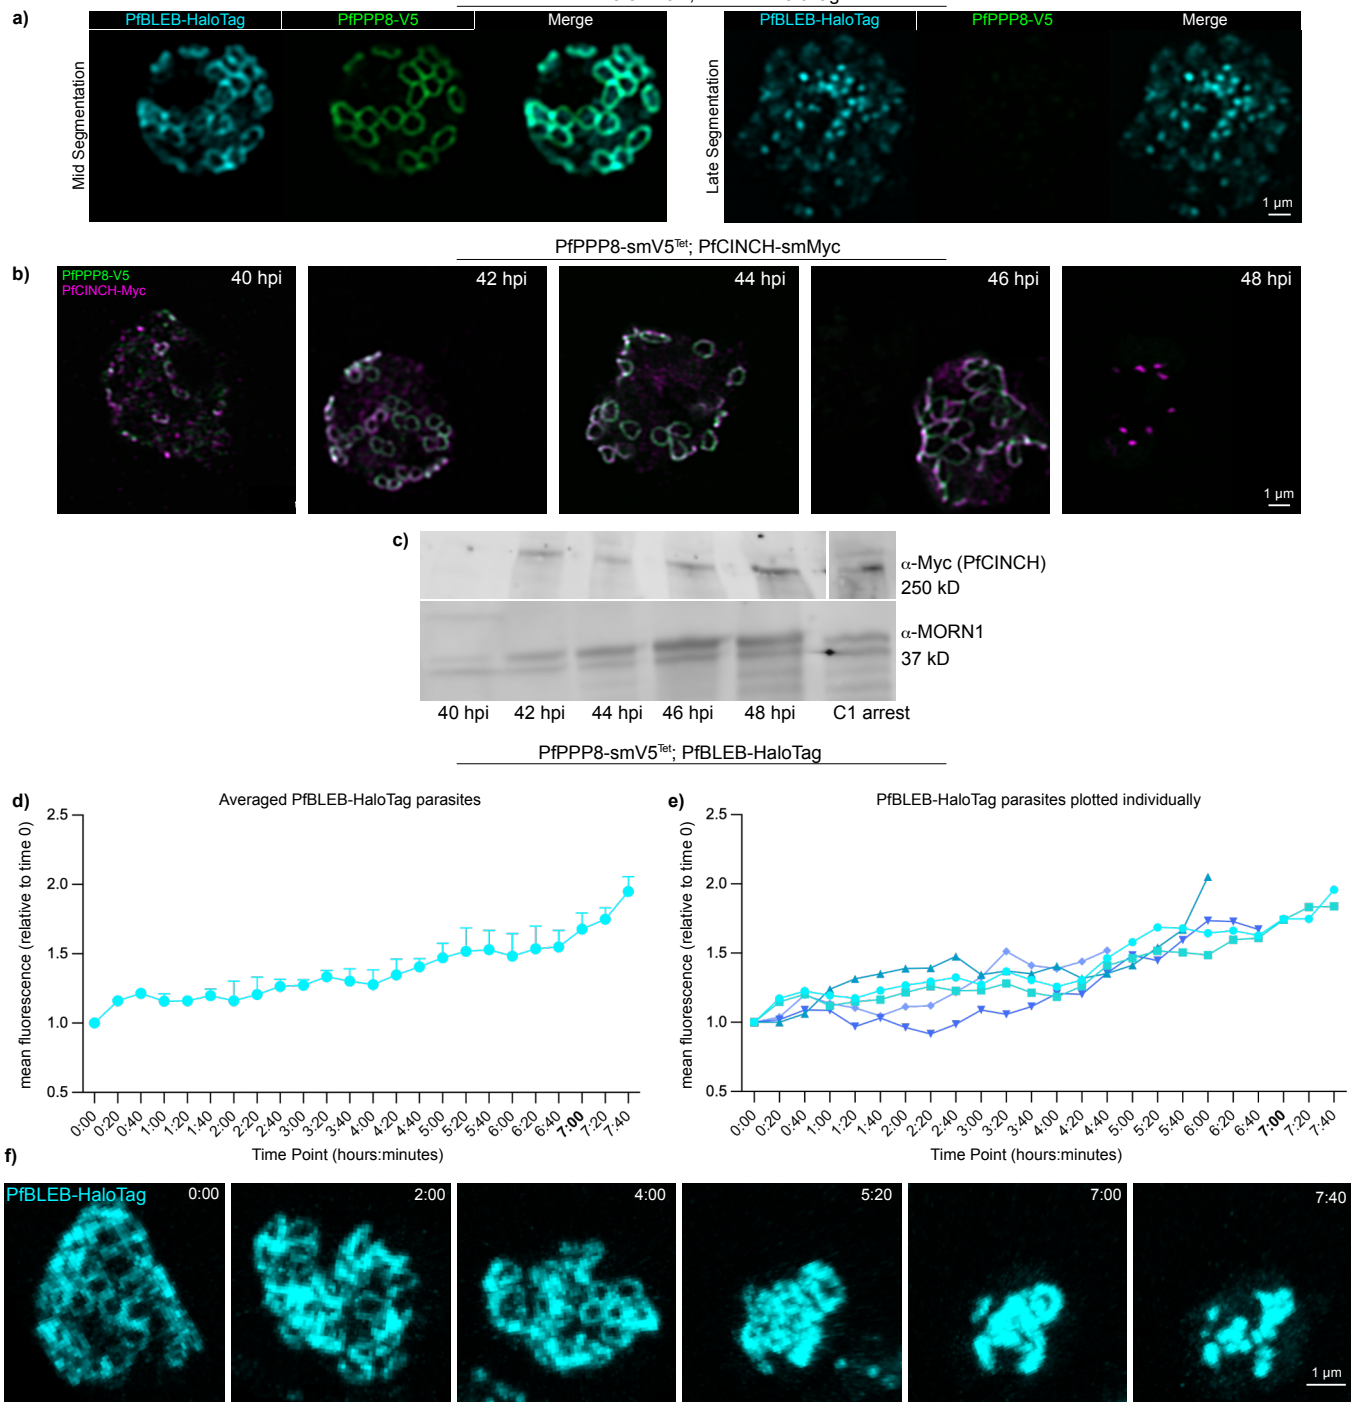

### Supplementary Figure 9 | Additional data comparing PfPPP8's temporal localization to PfBLEB, PfCINCH, and PfMORN1

**a.** Comparison of PfPPP8-smV5 and PfBLEB-HaloTag expression in PfPPP8-smV5<sup>int</sup>; PfBLEB-HaloTag parasites at the middle and end of segmentation. **b.** Regular IFA timeline of PfPPP8 and PfCINCH expression from 40 to 48 hours with images taken every 2 hours in PfPPP8-smV5<sup>int</sup>; PfCINCH-smMyc parasites. **c.** Immunoblot comparing PfCINCH-smMyc and PfMORN1 expression over the course of segmentation, from fig. 6b samples. **d.** Quantification of relative PfBLEB-HaloTag fluorescence, compared to fluorescence at the onset of imaging, for averaged PfPPP8-smV5<sup>int</sup>; PfBLEB-HaloTag parasites (n=5 parasites, matched by initial BCD) (time represented as hours:minutes on each image. Data presented as mean values  $\pm$  SD). **e.** Quantification of relative fluorescence, compared to fluorescence at the onset of imaging, for individual PfBLEB-HaloTag parasites in **d.** Time point = time after initiation of imaging. **f.** Selected time points (time represented as hours:minutes on each image) demonstrating PfBLEB-HaloTag fluorescence in one of the schizonts analyzed in **d** & **e.**



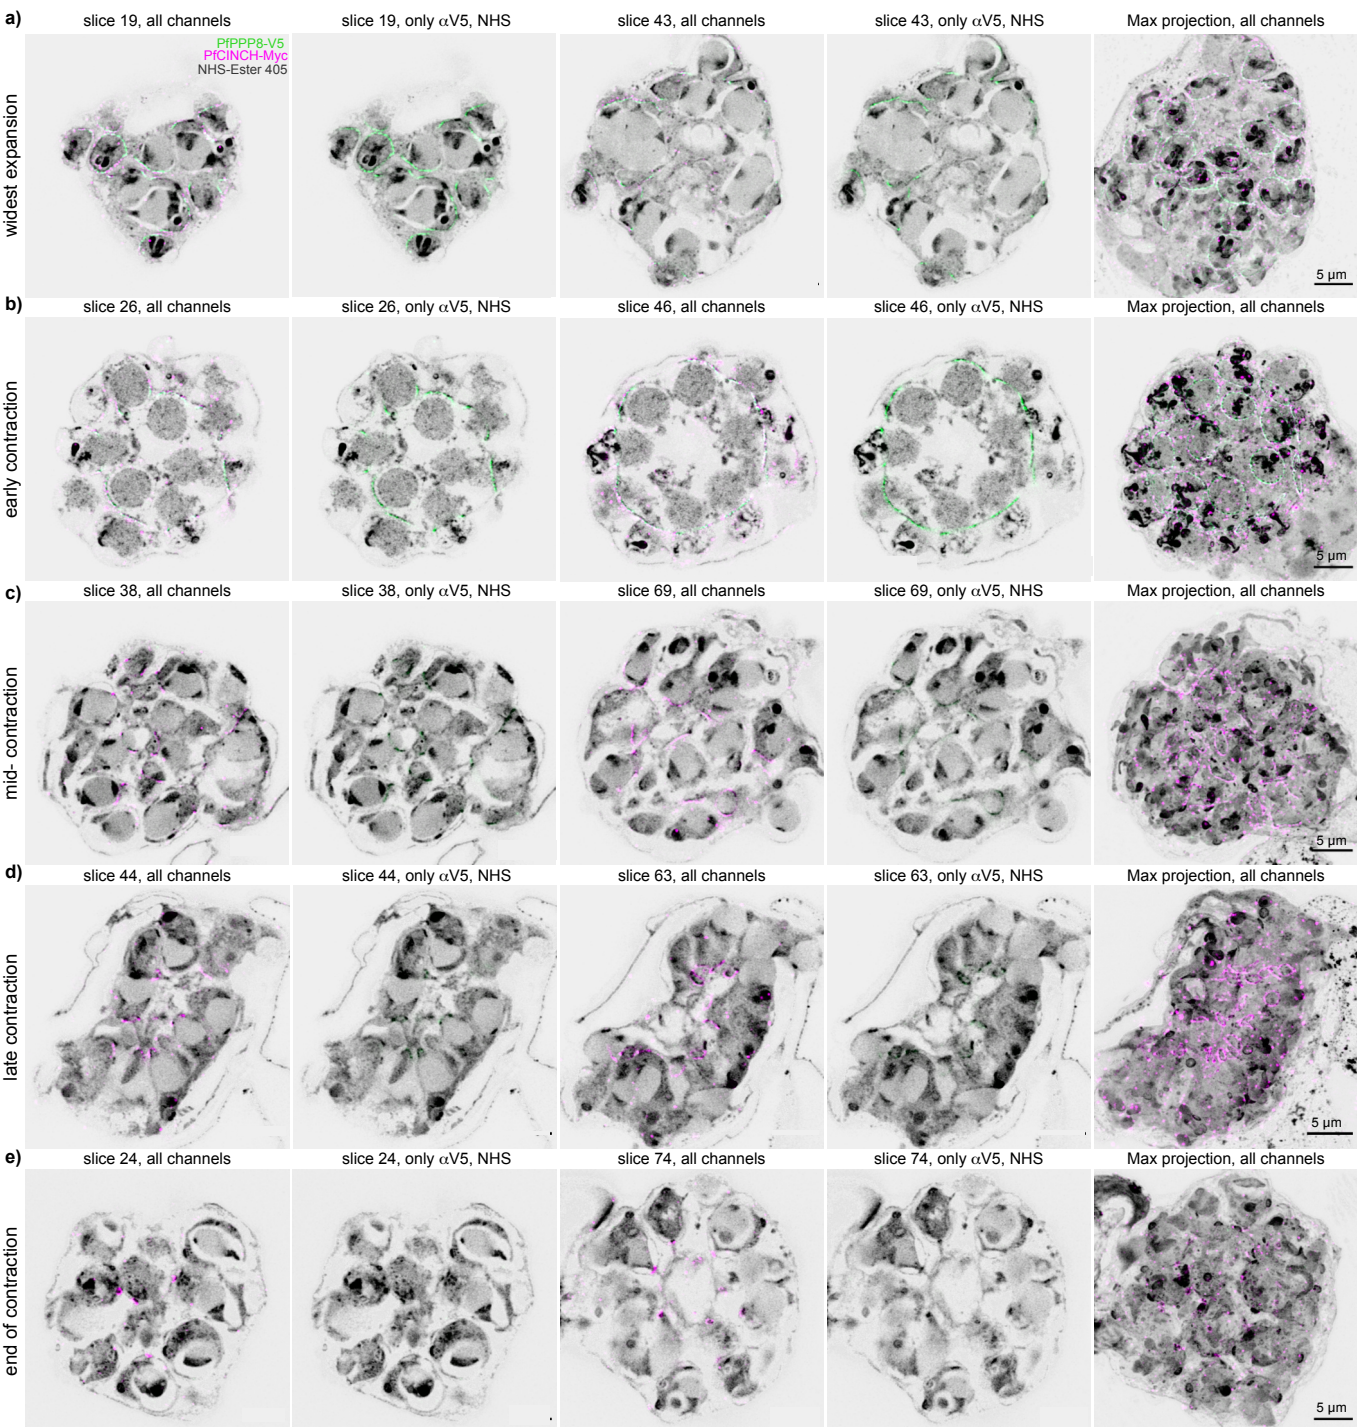

**Supplementary Fig. 10 | Expansion microscopy shows PfPPP8-depletion over the course of basal complex contraction.**

**a,** Individual slices from a mid-segmentation schizont with both tagged proteins or only PfPPP8-V5 displayed. Maximum projection demonstrates ring size and shape. **b,** Individual slices from a schizont beginning basal complex contraction with both tagged proteins or only PfPPP8-V5 displayed. Maximum projection demonstrates ring size and shape. **c,** Individual slices from a schizont midway through basal complex contraction with both tagged proteins or only PfPPP8-V5 displayed. Maximum projection demonstrates ring size and shape. **d,** Individual slices from a schizont finishing basal complex contraction with both tagged proteins or only PfPPP8-V5 displayed. Maximum projection demonstrates ring size and shape. **e,** Individual slices from a schizont having completed basal complex contraction with both tagged proteins or only PfPPP8-V5 displayed. Maximum projection demonstrates ring size and shape.



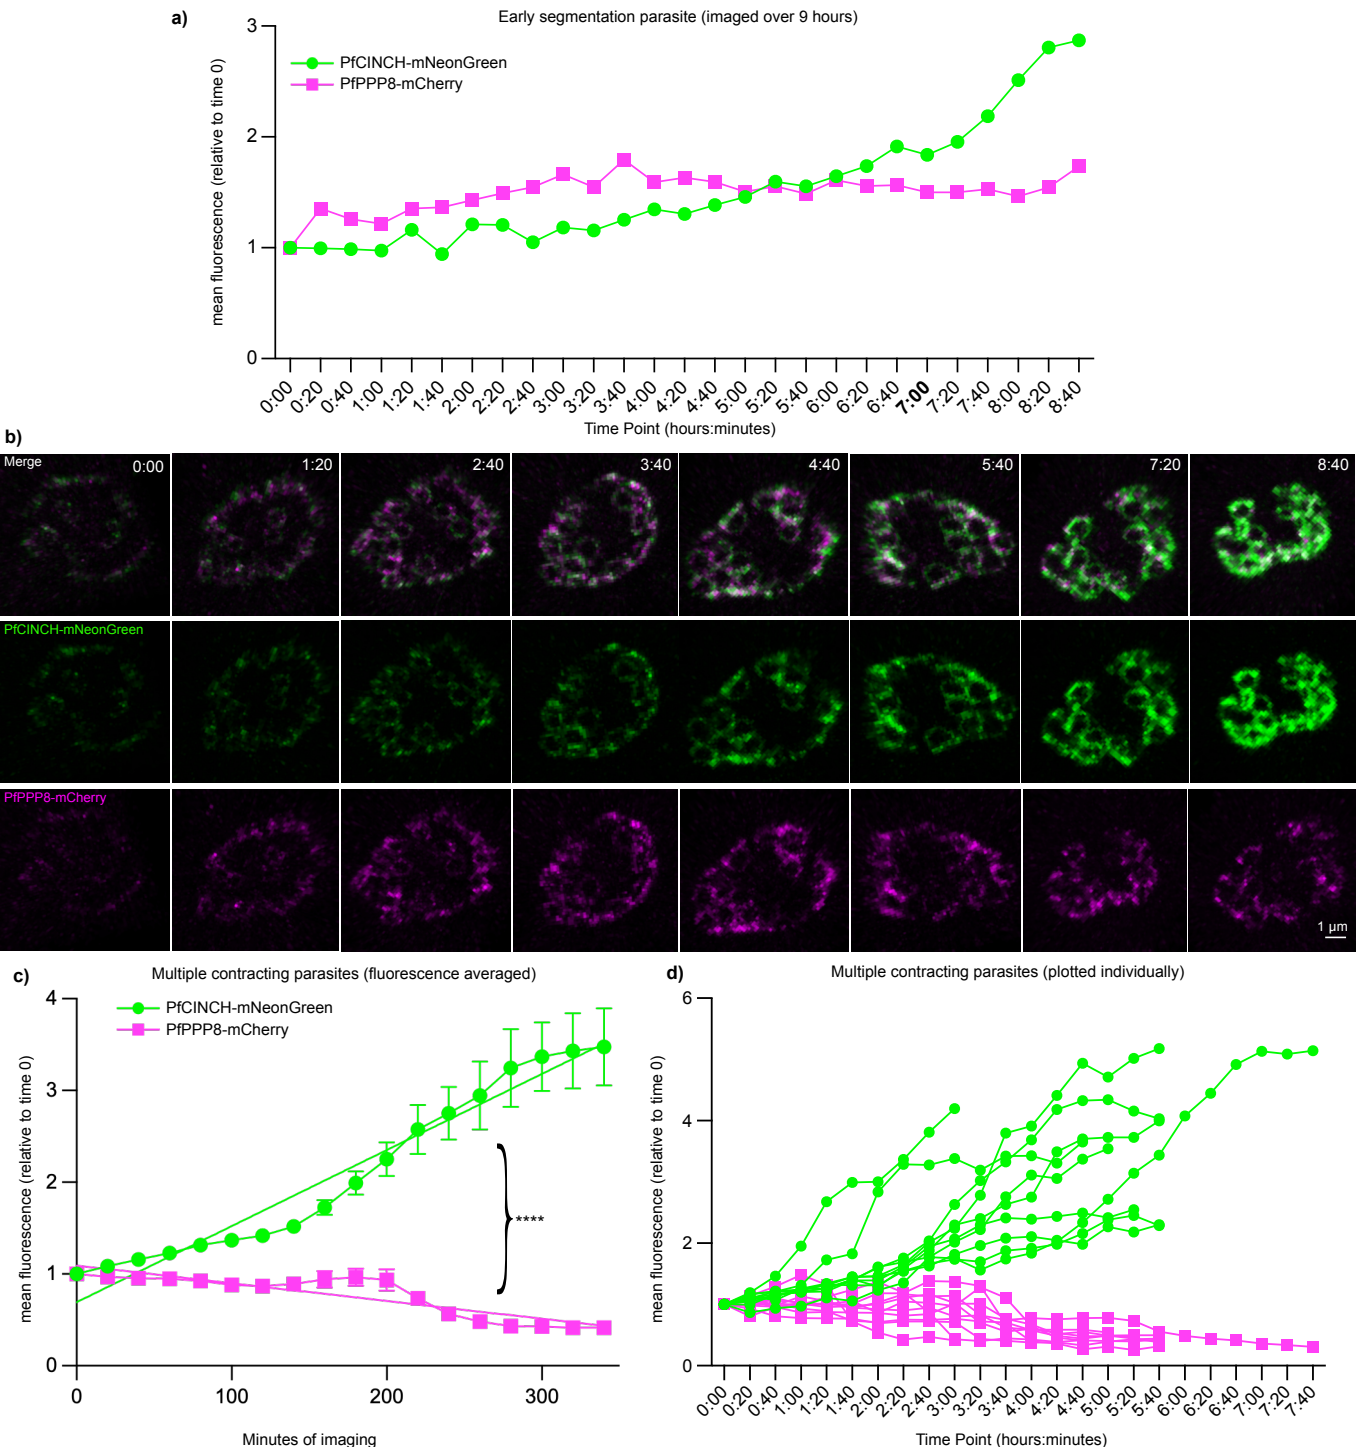

**Supplementary Fig. 11 | Additional data on PfPPP8's temporal localization in the PFCINCH-mNeonGreen; PfPPP8-mCherry parasites.**

**a,** Quantification of relative fluorescence, compared to fluorescence at the onset of imaging, for both PFCINCH-mNeonGreen and PfPPP8-mCherry in an early segmentation schizont. Time point = time after initiation of imaging. **b,** Selected time points (time represented as hours:minutes on each image) from Supplementary Video 9, corresponding to time points in **a**, comparing PFCINCH-mNeonGreen and PfPPP8-mCherry fluorescence. **c,** Quantification of relative fluorescence, compared to fluorescence at the onset of imaging, for averaged PFCINCH-mNeonGreen and PfPPP8-mCherry parasites ( $n=7$  parasites, representing multiple biological replicates; data presented as mean values  $\pm$  SD). Regression analysis created a line of best fit for each protein's fluorescence and the slopes are significantly different (two-tailed  $t$  test;  $p < 0.0001$ ; Analysis of Covariance). **d,** Quantification of relative fluorescence, compared to fluorescence at the onset of imaging, for individual PFCINCH-mNeonGreen; PfPPP8-mCherry parasites in **c**. Time point = time after initiation of imaging

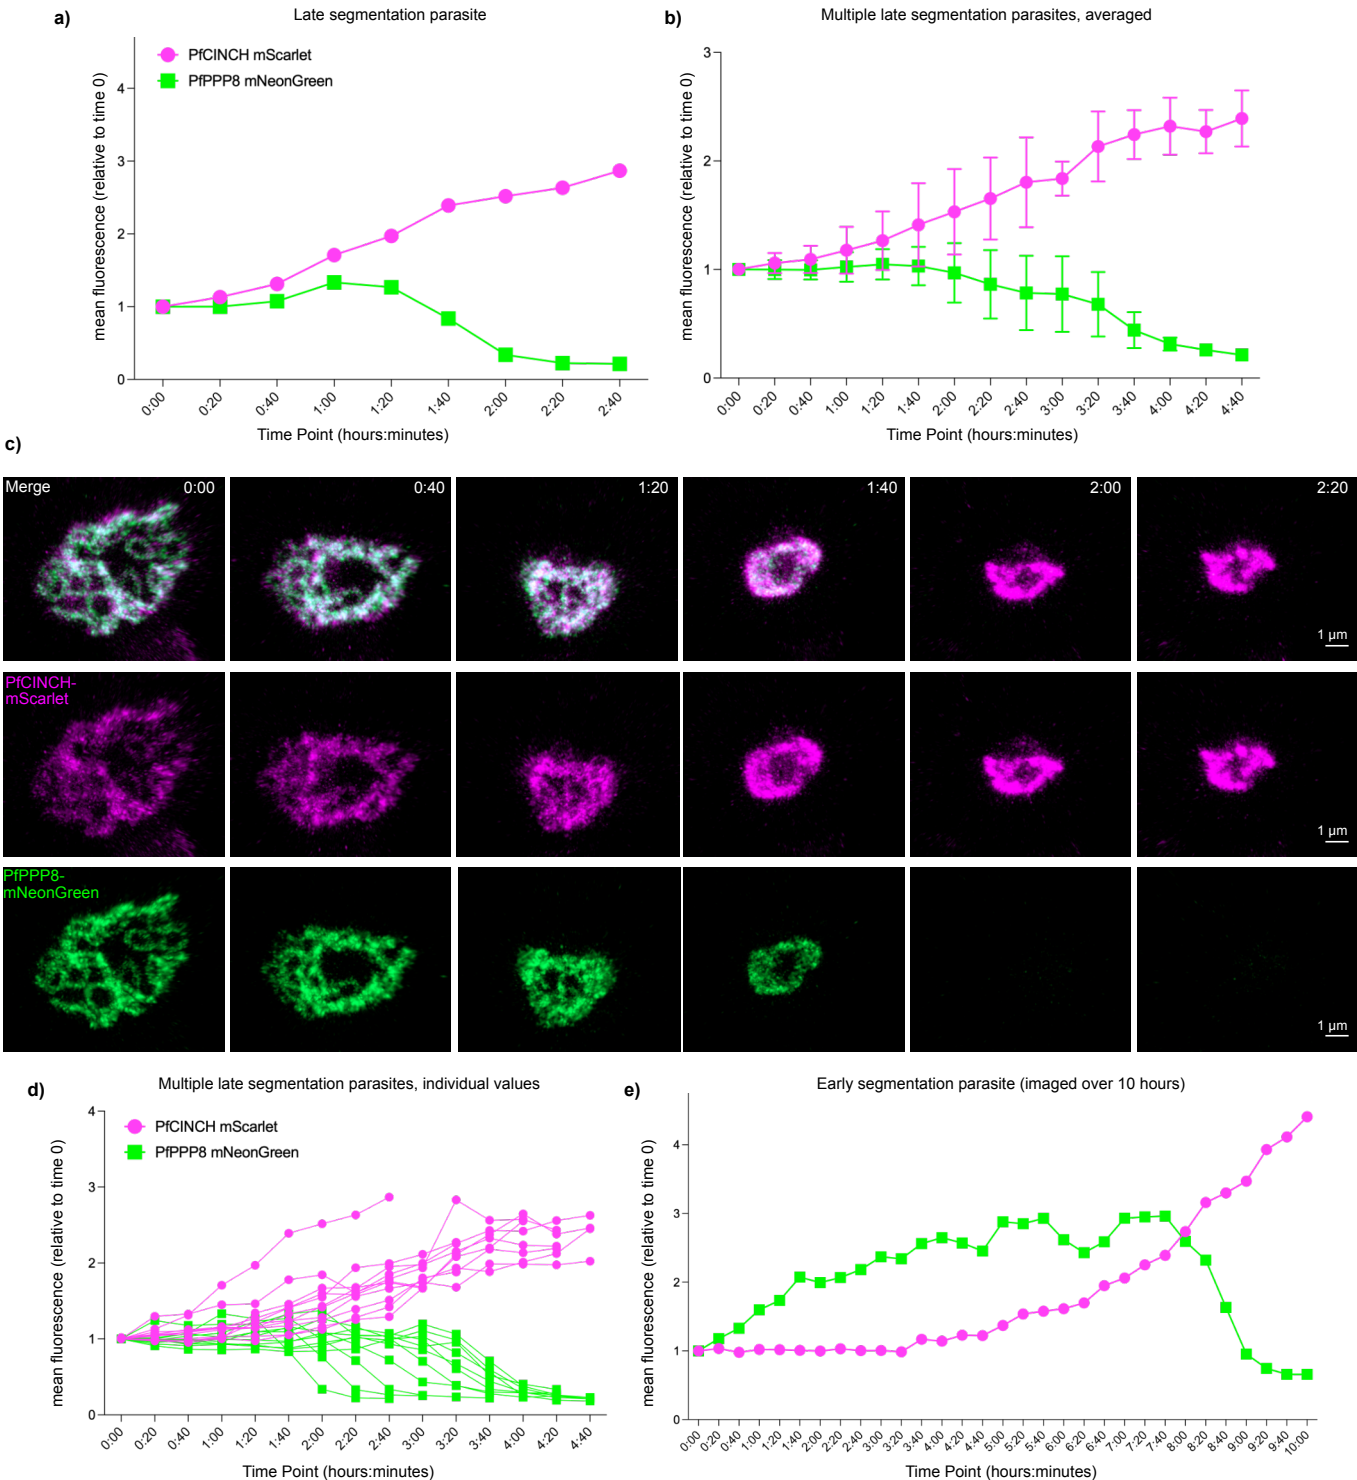

**Supplementary Figure 12 | Data on PfPPP8's temporal localization in PfCINCH-mScarlet; PfPPP8-mNeonGreen parasites.**

**a.** Quantification of relative fluorescence, compared to fluorescence at the onset of imaging, for both PfCINCH-mScarlet and PfPPP8-mNeonGreen in a late segmentation schizont. **b.** Quantification of relative fluorescence, compared to fluorescence at the onset of imaging, for averaged PfCINCH-mScarlet and PfPPP8-mNeonGreen parasites ( $n=10$  parasites, representing multiple biological replicates; data presented as mean values  $\pm$  SD). **c.** Selected time points (time represented as hours:minutes on each image) from Supplementary Video 10, corresponding to time points in **a.**, comparing PfCINCH-mScarlet and PfPPP8-mNeonGreen fluorescence. **d.** Quantification of relative fluorescence, compared to fluorescence at the onset of imaging, for individual PfCINCH-mScarlet; PfPPP8-mNeonGreen parasites in **b.** **e.** Quantification of relative fluorescence, compared to fluorescence at the onset of imaging, for both PfCINCH-mScarlet and PfPPP8-mNeonGreen in an early segmentation schizont (see Supplementary Video 11).

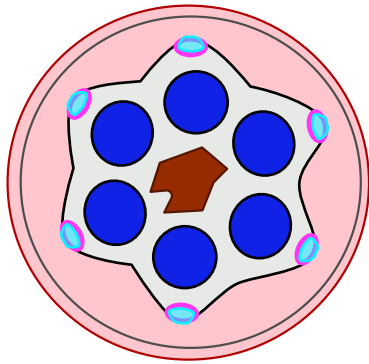

40 HPI

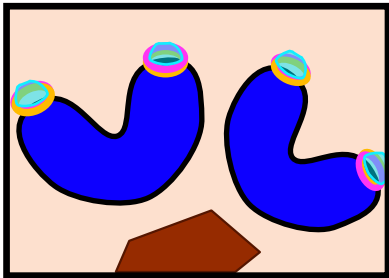

PfCINCH  
PfMORN1  
PfBLEB  
PfBCP1  
PfPPP8

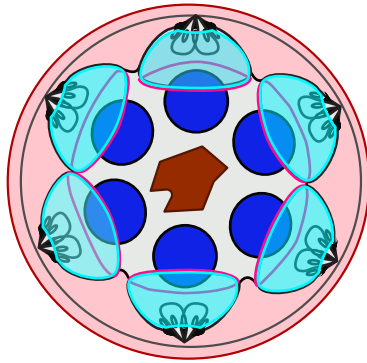

46 HPI

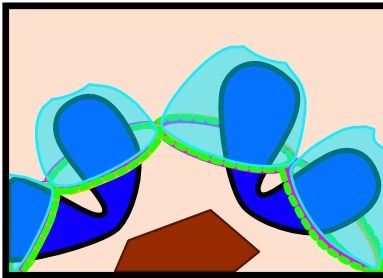

PfCINCH PfMyoJ  
PfMORN1 Pf3D7\_0214700  
PfBLEB  
PfBCP1  
PfPPP8

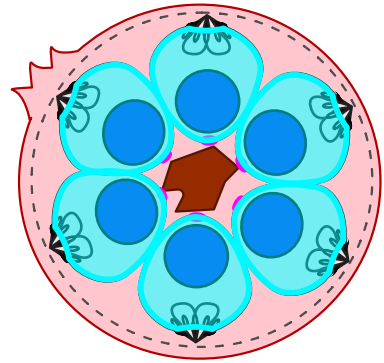

48 HPI

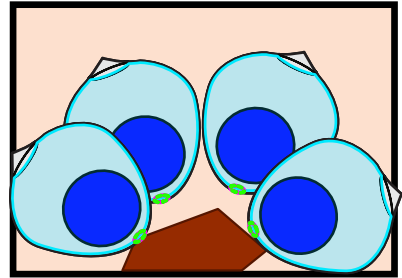

PfCINCH PfMyoJ  
PfMORN1 Pf3D7\_0214700  
PfBLEB  
PfBCP1

### Supplementary Figure 13 | Basal Complex Timing Model

Top row: simplified model of the process of segmentation in *Plasmodium* schizonts dividing in the RBC, with three time points depicted. The nucleus is dark blue, inner membrane complex cyan, basal complex magenta, hemozoin crystal red-orange. Bottom row: 'zoomed-in' representations of the basal complex in more detail at each stage, with selected BC proteins colored according to their temporal localization. In magenta, the bulk of the known basal complex proteins which are present throughout segmentation. In orange, proteins which depart before segmentation ends but are present early in the process. In green, proteins which are recruited partway through segmentation. This model is meant only to demonstrate temporal relationships between basal complex proteins; spatial relationships of proteins to each other within the ring should not be inferred from the arrangement of colors in the diagram



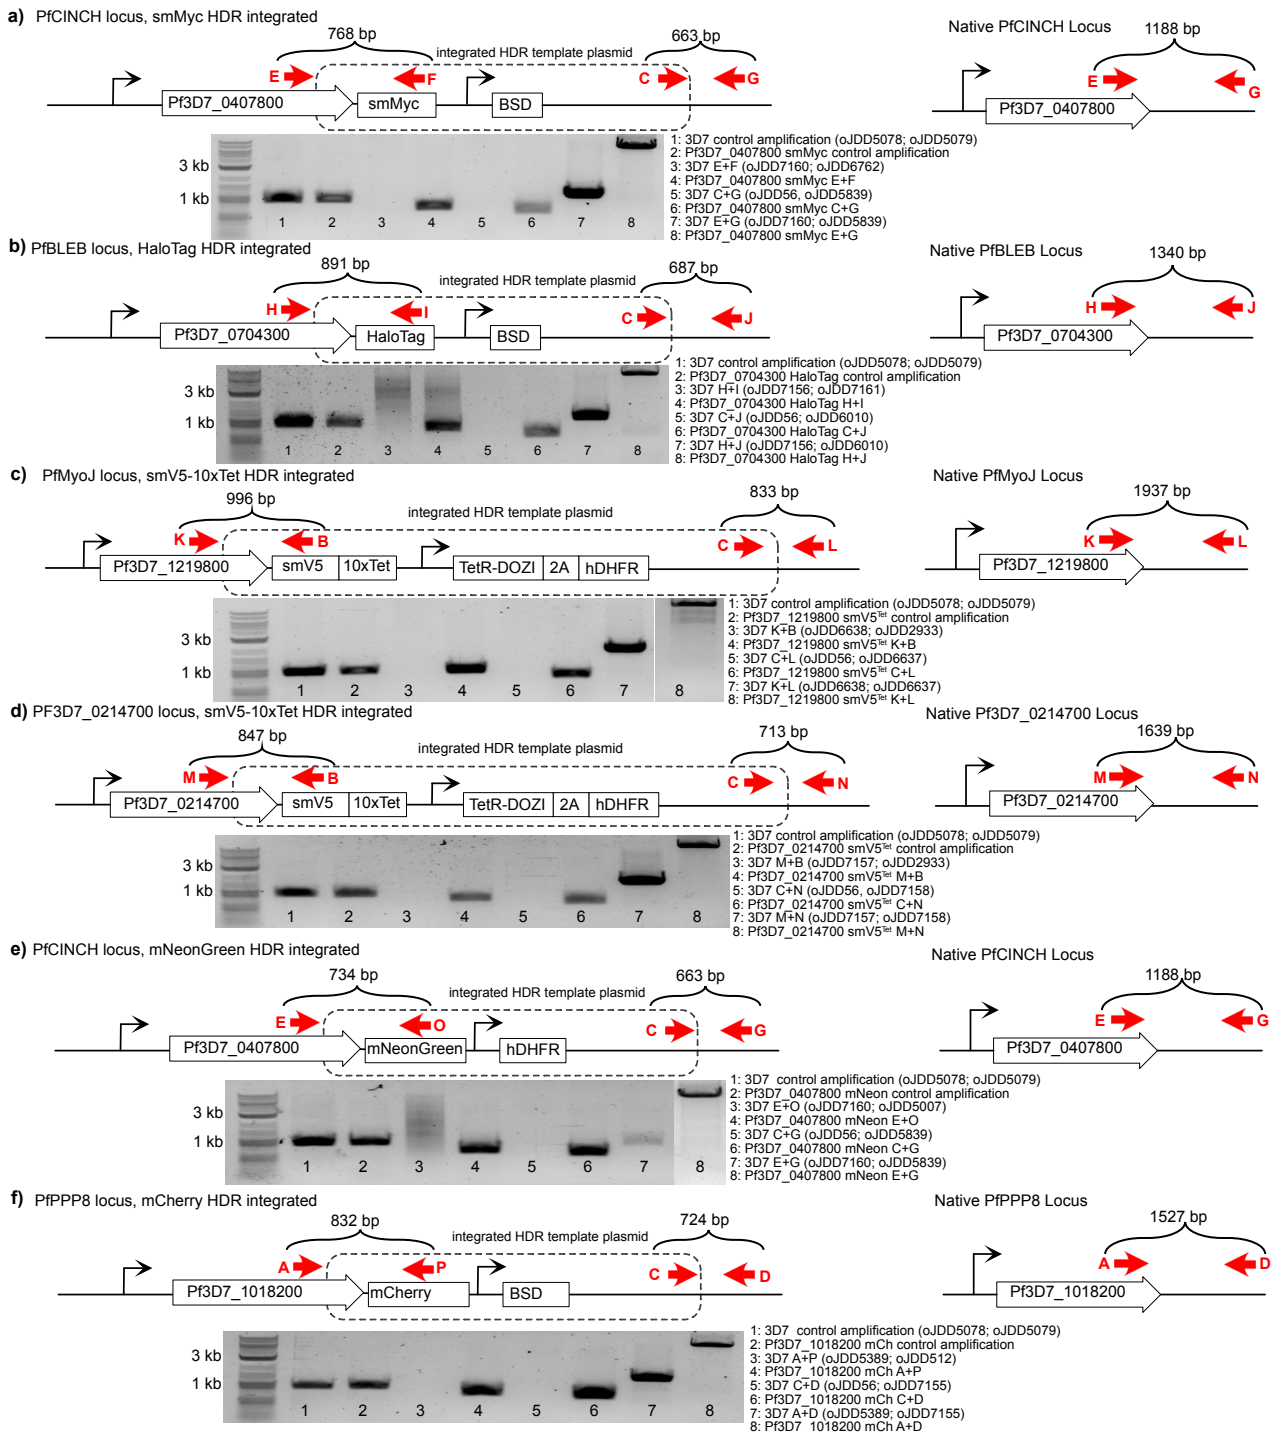

**Supplementary Fig. 14 | Integration PCRs for 5 of the 8 lines generated and utilized.**

**a.** For the PfCINCH locus in the PfPPP8-smV5<sup>int</sup>; PfCINCH-smMyc line, schematic showing the locus upon HDR integration and the native locus. Below, PCR amplifications of bracketed regions utilizing primers labelled in red; reactions labelled to the right of the image. Amplifications in the modified line are run adjacent to the same reaction in the parental (3D7) line. **b – f** are identical in setup, providing the same information about each genetically modified parasite generated and utilized.

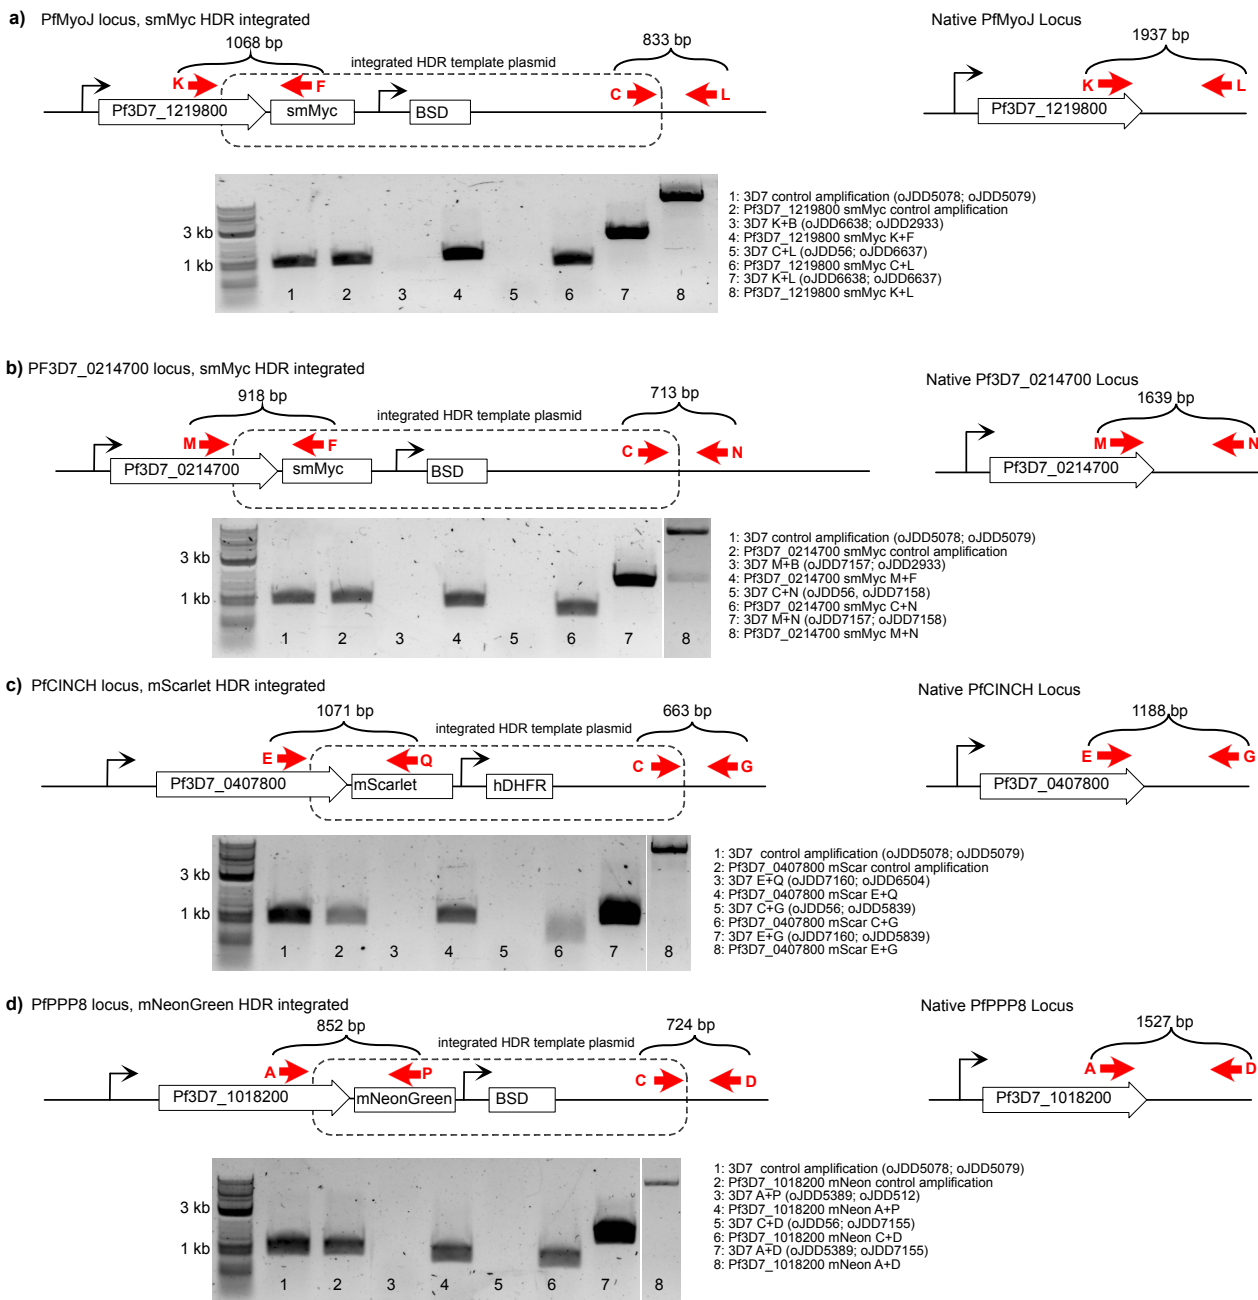

**Supplementary Fig. 15 | Integration PCRs for 3 of the 8 lines generated and utilized.**

**a**, For the PfPPP8-smV5<sup>int</sup>; PfMyoJ-smMyc line, schematic showing the locus upon HDR integration and the native locus. Below, PCR amplifications of bracketed regions utilizing primers labelled in red; reactions labelled to the right of the image. Amplifications in the modified line are run adjacent to the same reaction in the parental (3D7) line. **b – d** are identical in setup, providing the same information about each genetically modified parasite generated and utilized.

Supplementary Note 1

|                     | 1    | 10   | 20   | 30   | 40   | 50    |       |       |       |       |        |       |       |       |       |       |       |       |      |       |       |       |       |       |      |    |     |      |    |    |    |    |    |   |   |   |   |   |   |   |   |   |   |   |   |   |   |   |   |   |   |   |   |   |   |
|---------------------|------|------|------|------|------|-------|-------|-------|-------|-------|--------|-------|-------|-------|-------|-------|-------|-------|------|-------|-------|-------|-------|-------|------|----|-----|------|----|----|----|----|----|---|---|---|---|---|---|---|---|---|---|---|---|---|---|---|---|---|---|---|---|---|---|
| B. sp. xinjiang     | CSYN | ELLE | LCDV | SNIV | QET  | FVNVN | LQGT  | ..... | T     | QLHG  | PLNGNV | LTLLE | SE    | NSI   | IGWP  |       |       |       |      |       |       |       |       |       |      |    |     |      |    |    |    |    |    |   |   |   |   |   |   |   |   |   |   |   |   |   |   |   |   |   |   |   |   |   |   |
| B. bigemina         | CSYN | ELLE | LCDV | VCGV | VVRQ | ESV   | LHME  | GT    | ..... | VQMH  | PLNGSV | LTLLE | SE    | NCL   | IGWP  |       |       |       |      |       |       |       |       |       |      |    |     |      |    |    |    |    |    |   |   |   |   |   |   |   |   |   |   |   |   |   |   |   |   |   |   |   |   |   |   |
| B. ovata            | CSYN | ELLE | LCDV | VCGV | VVRQ | ESV   | LHME  | GT    | ..... | VQMH  | PLNGSV | LTLLE | SE    | NCL   | IGWP  |       |       |       |      |       |       |       |       |       |      |    |     |      |    |    |    |    |    |   |   |   |   |   |   |   |   |   |   |   |   |   |   |   |   |   |   |   |   |   |   |
| B. divergens        | CSYN | EMLE | LCDV | VACG | VVKQ | EP    | CMLK  | LQGT  | ..... | VOIH  | PLNGSV | FTLLE | SE    | NSL   | IGWP  |       |       |       |      |       |       |       |       |       |      |    |     |      |    |    |    |    |    |   |   |   |   |   |   |   |   |   |   |   |   |   |   |   |   |   |   |   |   |   |   |
| B. bovis            | CSYN | ELVE | LCDV | MCHI | IVRK | EG    | GALVR | LQGT  | ..... | TOLHG | PLNGDV | VYTL  | LD    | TENS  | IGWP  |       |       |       |      |       |       |       |       |       |      |    |     |      |    |    |    |    |    |   |   |   |   |   |   |   |   |   |   |   |   |   |   |   |   |   |   |   |   |   |   |
| B. microti          | CNYH | SLV  | LCNN | FSSH | LLAK | ED    | TIVK  | IKSP  | ..... | TRIGE | ELGNFV | DLIR  | T     | ENI   | YGWP  |       |       |       |      |       |       |       |       |       |      |    |     |      |    |    |    |    |    |   |   |   |   |   |   |   |   |   |   |   |   |   |   |   |   |   |   |   |   |   |   |
| Be. besnoiti        | LAL  | EMVA | LFDA | CSVL | FAAE | ET    | VIE   | VNL   | ..... | PSKIF | GDHGH  | LADL  | LE    | FGS   | FGWP  |       |       |       |      |       |       |       |       |       |      |    |     |      |    |    |    |    |    |   |   |   |   |   |   |   |   |   |   |   |   |   |   |   |   |   |   |   |   |   |   |
| Ch. velia           | CTAE | EMLC | LCDR | VVLL | LFME | ED    | TLVD  | VLL   | ..... | PCRVY | GDVHG  | QLP   | DL    | LA    | ET    | FSWP  |       |       |      |       |       |       |       |       |      |    |     |      |    |    |    |    |    |   |   |   |   |   |   |   |   |   |   |   |   |   |   |   |   |   |   |   |   |   |   |
| Cr. muris           | ATVD | EIMK | LCDT | VVEL | LF   | RK    | ENSLI | Q     | NSEF  | ..... | KMPVR  | IFGD  | IHG   | QLF   | DIL   | HE    | EK    | FSWP  |      |       |       |       |       |       |      |    |     |      |    |    |    |    |    |   |   |   |   |   |   |   |   |   |   |   |   |   |   |   |   |   |   |   |   |   |   |
| Cr. andersoni       | ATVD | EIMK | LCDT | VVEL | LF   | RK    | ENSLI | Q     | NSEF  | ..... | KMPVR  | IFGD  | IHG   | QLF   | DIL   | HE    | EK    | FSWP  |      |       |       |       |       |       |      |    |     |      |    |    |    |    |    |   |   |   |   |   |   |   |   |   |   |   |   |   |   |   |   |   |   |   |   |   |   |
| Cr. ubiquitum       | LSYS | EIMD | LCDR | LVQI | IR   | EN    | SLVR  | IKK   | ..... | NNSVR | IFGD   | IHG   | QLI   | DL    | LY    | FE    | FSWP  |       |      |       |       |       |       |       |      |    |     |      |    |    |    |    |    |   |   |   |   |   |   |   |   |   |   |   |   |   |   |   |   |   |   |   |   |   |   |
| Cr. meleagridis     | LSCS | EIMD | LCDR | AVQI | IR   | GE    | DSLK  | IKR   | ..... | NNSVR | IFGD   | IHG   | QLI   | DL    | LY    | FE    | FSWP  |       |      |       |       |       |       |       |      |    |     |      |    |    |    |    |    |   |   |   |   |   |   |   |   |   |   |   |   |   |   |   |   |   |   |   |   |   |   |
| Cr. hominis         | LNCS | EIMD | LCDR | AVQI | IR   | GE    | DSLK  | IKG   | ..... | NNSVR | IFGD   | IHG   | QLI   | DL    | LY    | FE    | FSWP  |       |      |       |       |       |       |       |      |    |     |      |    |    |    |    |    |   |   |   |   |   |   |   |   |   |   |   |   |   |   |   |   |   |   |   |   |   |   |
| Cr. parvum          | LNCS | EIMD | LCDR | AVQI | IR   | GE    | DSLK  | IKG   | ..... | NNSVR | IFGD   | IHG   | QLI   | DL    | LY    | FE    | FSWP  |       |      |       |       |       |       |       |      |    |     |      |    |    |    |    |    |   |   |   |   |   |   |   |   |   |   |   |   |   |   |   |   |   |   |   |   |   |   |
| Cr. tyzzeri         | LDCS | EIMD | LCDR | AVQI | IR   | GE    | DSLK  | IKG   | ..... | NNSVR | IFGD   | IHG   | QLI   | DL    | LY    | FE    | FSWP  |       |      |       |       |       |       |       |      |    |     |      |    |    |    |    |    |   |   |   |   |   |   |   |   |   |   |   |   |   |   |   |   |   |   |   |   |   |   |
| Cr. sp. chipmunk    | LNYS | EIMD | LCDR | AVQI | IR   | GE    | DSLK  | IKG   | ..... | NNSVR | IFGD   | IHG   | QLI   | DL    | LY    | FE    | FSWP  |       |      |       |       |       |       |       |      |    |     |      |    |    |    |    |    |   |   |   |   |   |   |   |   |   |   |   |   |   |   |   |   |   |   |   |   |   |   |
| Cr. ryanae          | LNHL | EII  | ELCD | QVVE | VIR  | EN    | SLIR  | INKE  | ..... | NNAIR | IFGD   | GLY   | Q     | SL    | ES    | FSWP  |       |       |      |       |       |       |       |       |      |    |     |      |    |    |    |    |    |   |   |   |   |   |   |   |   |   |   |   |   |   |   |   |   |   |   |   |   |   |   |
| Cr. bovis           | LNYL | EIMK | LCDQ | VVEV | IR   | EN    | SLIR  | LNGE  | ..... | NNTIR | IFGD   | GLY   | Q     | SL    | ES    | FSWP  |       |       |      |       |       |       |       |       |      |    |     |      |    |    |    |    |    |   |   |   |   |   |   |   |   |   |   |   |   |   |   |   |   |   |   |   |   |   |   |
| Cyc. cayetanensis   | ATAS | EAL  | LCD  | AVAS | LAL  | EN    | SLE   | L     | LEL   | ..... | PLRVY  | GDHGH | LADL  | LE    | FGS   | FGWP  |       |       |      |       |       |       |       |       |      |    |     |      |    |    |    |    |    |   |   |   |   |   |   |   |   |   |   |   |   |   |   |   |   |   |   |   |   |   |   |
| Cys. suis           | ATPD | EILT | ILE  | AVK  | IF   | SV    | ET    | TVLE  | VNL   | ..... | PAKIF  | GDHGH | LADL  | LE    | FGS   | FGWP  |       |       |      |       |       |       |       |       |      |    |     |      |    |    |    |    |    |   |   |   |   |   |   |   |   |   |   |   |   |   |   |   |   |   |   |   |   |   |   |
| Cyt. felis          | CTYN | EM   | NLFD | T    | VYTL | IR    | EN    | SLEY  | IDGI  | ..... | VOIHG  | MNND  | LY    | SL    | ID    | EN    | TY    | GW    |      |       |       |       |       |       |      |    |     |      |    |    |    |    |    |   |   |   |   |   |   |   |   |   |   |   |   |   |   |   |   |   |   |   |   |   |   |
| E. tenella          | ATAE | EAL  | K    | LCD  | ATAS | LVA   | AE    | SLE   | L     | LEL   | .....  | PLRVY | GDHGH | LADL  | LE    | FGS   | FGWP  |       |      |       |       |       |       |       |      |    |     |      |    |    |    |    |    |   |   |   |   |   |   |   |   |   |   |   |   |   |   |   |   |   |   |   |   |   |   |
| E. falciformis      | ATAQ | EAL  | T    | LCD  | AVAS | LVA   | AE    | SLE   | L     | LEL   | .....  | PLRVY | GDHGH | LADL  | LE    | FGS   | FGWP  |       |      |       |       |       |       |       |      |    |     |      |    |    |    |    |    |   |   |   |   |   |   |   |   |   |   |   |   |   |   |   |   |   |   |   |   |   |   |
| H. hammondi         | VAAE | E    | IV   | A    | LCD  | AVG   | SLVA  | AE    | TVIE  | L     | LDI    | ..... | PLKIF | GDHGH | LADL  | LE    | FGS   | FGWP  |      |       |       |       |       |       |      |    |     |      |    |    |    |    |    |   |   |   |   |   |   |   |   |   |   |   |   |   |   |   |   |   |   |   |   |   |   |
| N. caninum          | LAVE | E    | V    | A    | LCD  | AV    | ER    | LVA   | AE    | TVIE  | L      | LDV   | ..... | PLKIY | GDHGH | LADL  | LE    | FGS   | FGWP |       |       |       |       |       |      |    |     |      |    |    |    |    |    |   |   |   |   |   |   |   |   |   |   |   |   |   |   |   |   |   |   |   |   |   |   |
| P. falciparum       | CTYN | D    | ILL  | LCDE | VAKL | FK    | ME    | EN    | SLEN  | V     | TLP    | ..... | CKVFG | DVHGN | L     | F     | DL    | DE    | FN   | LY    | NWP   |       |       |       |      |    |     |      |    |    |    |    |    |   |   |   |   |   |   |   |   |   |   |   |   |   |   |   |   |   |   |   |   |   |   |
| P. praefalciparum   | CTYN | D    | ILL  | LCDE | VAKL | FK    | ME    | EN    | SLEN  | V     | TLP    | ..... | CKVFG | DVHGN | L     | F     | DL    | DE    | FN   | LY    | NWP   |       |       |       |      |    |     |      |    |    |    |    |    |   |   |   |   |   |   |   |   |   |   |   |   |   |   |   |   |   |   |   |   |   |   |
| P. reichenowi       | CTYN | D    | ILL  | LCDE | VAKL | FK    | ME    | EN    | SLEN  | V     | TLP    | ..... | CKVFG | DVHGN | L     | F     | DL    | DE    | FN   | LY    | NWP   |       |       |       |      |    |     |      |    |    |    |    |    |   |   |   |   |   |   |   |   |   |   |   |   |   |   |   |   |   |   |   |   |   |   |
| P. blacklocki       | CTYN | D    | ILL  | LCDE | VAKL | FK    | ME    | EN    | SLEN  | V     | TLP    | ..... | CKVFG | DVHGN | L     | F     | DL    | DE    | FN   | LY    | NWP   |       |       |       |      |    |     |      |    |    |    |    |    |   |   |   |   |   |   |   |   |   |   |   |   |   |   |   |   |   |   |   |   |   |   |
| P. billcollinsi     | CTYN | D    | ILL  | LCDE | VAKL | FK    | ME    | EN    | SLEN  | V     | TLP    | ..... | CKVFG | DVHGN | L     | F     | DL    | DE    | FN   | LY    | NWP   |       |       |       |      |    |     |      |    |    |    |    |    |   |   |   |   |   |   |   |   |   |   |   |   |   |   |   |   |   |   |   |   |   |   |
| P. adleri           | CTYN | D    | ILL  | LCDE | VAKL | FK    | ME    | EN    | SLEN  | V     | TLP    | ..... | CKVFG | DVHGN | L     | F     | DL    | DE    | FN   | LY    | NWP   |       |       |       |      |    |     |      |    |    |    |    |    |   |   |   |   |   |   |   |   |   |   |   |   |   |   |   |   |   |   |   |   |   |   |
| P. gaboni           | CTYN | D    | ILL  | LCDE | VAKL | FK    | ME    | EN    | SLEN  | V     | TLP    | ..... | CKVFG | DVHGN | L     | F     | DL    | DE    | FN   | LY    | NWP   |       |       |       |      |    |     |      |    |    |    |    |    |   |   |   |   |   |   |   |   |   |   |   |   |   |   |   |   |   |   |   |   |   |   |
| P. gallinaceum      | CSYN | D    | ILL  | LCDE | VAKL | FK    | ME    | EN    | SLEN  | V     | KLP    | ..... | CKVFG | DVHGN | L     | F     | DL    | DE    | FN   | LY    | NWP   |       |       |       |      |    |     |      |    |    |    |    |    |   |   |   |   |   |   |   |   |   |   |   |   |   |   |   |   |   |   |   |   |   |   |
| P. vivax            | CSYN | D    | IV   | L    | LCDE | AAK   | V     | LK    | G     | DS    | IE     | Q     | V     | ELP   | ..... | CKVFG | DVHGN | L     | F    | DL    | DE    | FN    | MY    | GW    |      |    |     |      |    |    |    |    |    |   |   |   |   |   |   |   |   |   |   |   |   |   |   |   |   |   |   |   |   |   |   |
| P. fragile          | CTYN | D    | ILL  | LCDE | AVK  | V     | FK    | G     | DS    | IE    | H      | V     | D     | L     | P     | ..... | CKVFG | DVHGN | L    | F     | DL    | DE    | FN    | MY    | NWP  |    |     |      |    |    |    |    |    |   |   |   |   |   |   |   |   |   |   |   |   |   |   |   |   |   |   |   |   |   |   |
| P. knowlesi         | CTYN | D    | ILL  | LCDE | AVK  | V     | FK    | G     | DS    | IE    | H      | V     | D     | L     | P     | ..... | CKVFG | DVHGN | L    | F     | DL    | DE    | FN    | MY    | NWP  |    |     |      |    |    |    |    |    |   |   |   |   |   |   |   |   |   |   |   |   |   |   |   |   |   |   |   |   |   |   |
| P. coatneyi         | CTYN | D    | ILL  | LCDE | AVK  | V     | FK    | G     | DS    | IE    | H      | V     | D     | L     | P     | ..... | CKVFG | DVHGN | L    | F     | DL    | DE    | FN    | MY    | NWP  |    |     |      |    |    |    |    |    |   |   |   |   |   |   |   |   |   |   |   |   |   |   |   |   |   |   |   |   |   |   |
| Th. parva           | CTYS | D    | IV   | N    | LCDS | ACY   | IL    | K     | K     | EN    | S      | L     | N     | L     | N     | ..... | FQVYS | LN    | G    | D     | L     | S     | C     | L     | L    | D  | L   | E    | FN | AY | GW |    |    |   |   |   |   |   |   |   |   |   |   |   |   |   |   |   |   |   |   |   |   |   |   |
| Th. annulata        | CTYT | D    | IV   | N    | LCDS | VCY   | IL    | K     | K     | EN    | S      | L     | N     | L     | N     | ..... | FQVYS | LN    | G    | D     | L     | S     | C     | L     | L    | D  | L   | E    | FN | AY | GW |    |    |   |   |   |   |   |   |   |   |   |   |   |   |   |   |   |   |   |   |   |   |   |   |
| Th. orientalis      | CAYS | D    | ML   | Q    | LCD  | AACS  | IL    | K     | K     | EN    | S      | L     | L     | K     | N     | ..... | VQVFG | LN    | G    | D     | L     | S     | C     | L     | L    | D  | EN  | AL   | D  | G  | .  |    |    |   |   |   |   |   |   |   |   |   |   |   |   |   |   |   |   |   |   |   |   |   |   |
| Th. equi            | CTYT | D    | LL   | K    | LCD  | S     | T     | C     | N     | L     | L      | K     | K     | EN    | S     | L     | L     | K     | N    | ..... | VQVFG | LN    | G     | D     | L    | S  | C   | L    | L  | D  | EN | AY | GW |   |   |   |   |   |   |   |   |   |   |   |   |   |   |   |   |   |   |   |   |   |   |
| To. gondii          | IAEE | D    | IV   | A    | L    | CE    | A     | M     | C     | S     | L      | V     | A     | A     | E     | T     | V     | V     | E    | ..... | LDI   | ..... | PLKIF | GDHGH | LADL | LE | FGS | FGWP |    |    |    |    |    |   |   |   |   |   |   |   |   |   |   |   |   |   |   |   |   |   |   |   |   |   |   |
| V. brassicaformis   | CTSD | E    | V    | K    | M    | L     | C     | D     | M     | V     | V      | H     | L     | I     | H     | E     | N     | T     | L    | V     | E     | ..... | LSL   | ..... | P    | V  | R   | V    | Y  | G  | D  | I  | H  | G | N | L | P | D | L | L | T | E | N | T | Y | A | W |   |   |   |   |   |   |   |   |
| S. cerevisiae. PPT1 | LPKK | Y    | V    | A    | A    | I     | S     | H     | A     | D     | T      | L     | F     | R     | Q     | E     | P     | S     | M    | V     | E     | ..... | L     | E     | N    | N  | S   | T    | P  | D  | V  | K  | I  | S | V | C | G | D | T | H | G | F | Y | D | V | L | N | L | E | R | K | E | G | K | V |

60

|                     |                                      |                                         |
|---------------------|--------------------------------------|-----------------------------------------|
| B. sp. xinjiang     | LHGESCDS                             | .....                                   |
| B. bigemina         | LHGNTADR                             | .....                                   |
| B. ovata            | LHGNTTER                             | .....                                   |
| B. divergens        | MHGNTSEK                             | .....                                   |
| B. bovis            | LHGDTCDM                             | .....                                   |
| B. microti          | LHSRANDDSTALS                        | .....                                   |
| Be. besnoiti        | GDIDKITQOME                          | .....                                   |
| Ch. velia           | .DKRRGDILSM                          | .....                                   |
| Cr. muris           | .HYHRGDILSM                          | .....                                   |
| Cr. andersoni       | .HYHRGDILSM                          | .....                                   |
| Cr. ubiquitum       | .HFHRGDILSM                          | .....                                   |
| Cr. meleagridis     | .HFHRGDILSM                          | .....                                   |
| Cr. hominis         | .HFHRGDILSM                          | .....                                   |
| Cr. parvum          | .HFHRGDILSM                          | .....                                   |
| Cr. tyzzeri         | .HFHRGDILSM                          | .....                                   |
| Cr. sp. chipmunk    | .HFHRGDILSM                          | .....                                   |
| Cr. ryanae          | .HYQKGDILSM                          | .....                                   |
| Cr. bovis           | .HYQKGDILSM                          | .....                                   |
| Cyc. cayetanensis   | .EEAMQQLNT                           | .....                                   |
| Cys. suis           | DEVDKTTRQYE                          | .....                                   |
| Cyt. felis          | LHN                                  | .....                                   |
| E. tenella          | .EDLISGLGC                           | .....                                   |
| E. falciformis      | .QETIEGLSS                           | .....                                   |
| H. hammondi         | DEPDKLTQVE                           | .....                                   |
| N. caninum          | GDEDKLTEQIE                          | .....                                   |
| P. falciparum       | MHNNKNLLLTESDLRKFYEIHN               | .....DKDIHIDKNKD                        |
| P. praefalciparum   | MHNNKNLLLTETDLRKFYEIHN               | .....DKDIHIDKNKD                        |
| P. reichenowi       | MHNNKNLLLTETDLRKFYEIHN               | .....DKDIHIDKNKD                        |
| P. blacklocki       | MHNNKNLLLTETDLRKFYEIHN               | .....DKDIHIDKYKD                        |
| P. billcollinsi     | MHNNKNLLLTETDLRKFYEIHN               | .....DKD                                |
| P. adleri           | MHNNKNLLLTETDLRKFYEIHN               | .....DKD                                |
| P. gaboni           | MHNNKNLLLTETDLRKFYEIHN               | .....DKD                                |
| P. gallinaceum      | MHNSMNELISINDLINFENMNYNKMENYSCEKIRDE | .....                                   |
| P. vivax            | LHGNTNEWLSVEEVAMRG                   | .....GRSVSVGKLKEAVPHTGGTSVSVEKRRETVPTDG |
| P. fragile          | LHGNTNEWLSVDEVATSD                   | .....ATCMSVGKANEASVANMAA                |
| P. knowlesi         | MHGETNEWLNVEEVSATN                   | .....EVSLSRKNSTD                        |
| P. coatneyi         | LHGETNEWLTVEEVATTD                   | .....GMSIPMGKPNE                        |
| Th. parva           | MTNKRCDVDELV                         | .....                                   |
| Th. annulata        | MTNKKSVDELV                          | .....                                   |
| Th. orientalis      | .....                                | .....                                   |
| Th. equi            | LHQ                                  | .....                                   |
| To. gondii          | GELDKLTQVE                           | .....                                   |
| V. brassicaformis   | .DRRRGDI                             | LT                                      |
| S. cerevisiae. PPT1 | GPKHT                                | .....                                   |



|                     | 70         | 80             | 90       | 100        | 110         |             |            |             |           |        |
|---------------------|------------|----------------|----------|------------|-------------|-------------|------------|-------------|-----------|--------|
| B. sp. xinjiang     | ...GVNKL   | LVDAGMYAKGEATK | LIFLGD   | MI GDV     | ..EGFSLETLL | VLFSLKILFP  | YHVFL      |             |           |        |
| B. bigemina         | ...SVARAVD | ASQYAKGETTK    | LVFLGD   | DL IGEV    | ..EGFSLETLL | VLFSLKVLFP  | YHVFL      |             |           |        |
| B. ovata            | ...KGARLV  | DAGQYAKGETTK   | LVFLGD   | DL IGEA    | ..EGFSLETLL | VLFSLKVLFP  | YHVFL      |             |           |        |
| B. divergens        | ...PRDQSV  | NPTQYAKGEATK   | LFLG     | DLTSEI     | ..EGYSLETLL | LFALKALFP   | YHIFII     |             |           |        |
| B. bovis            | ...ITNKL   | DAGMYAKGEATK   | LVFLGD   | NMI GDV    | ..EGFSMETLL | VLFSLKILFP  | YHVFL      |             |           |        |
| B. microti          | .....HI    | IINICGQ        | IINPPH   | PVVSLECLL  | LVMSLKVLP   | PKHITIVG    |            |             |           |        |
| Be. besnoiti        | .....D     | FLFLGD         | YVDR     | ..GHC      | SLDVLL      | LLFSLKVLFP  | NRVFL      |             |           |        |
| Ch. velia           | .....N     | VVFLGD         | FVDR     | ..GTF      | SLEVV       | ALMFSLKLLFP | PRKVFLL    |             |           |        |
| Cr. muris           | .....N     | YIFLGD         | YVDR     | ..GKFSLEVI | FLLFSFKILFP | NKIMML      |            |             |           |        |
| Cr. andersoni       | .....N     | YIFLGD         | YVDR     | ..GKFSLEVI | FLLFSFKILFP | NKIIML      |            |             |           |        |
| Cr. ubiquitum       | .....K     | VVFLGD         | YVDR     | ..GKFSLEVI | SILFSLKIMFP | DKIFLL      |            |             |           |        |
| Cr. meleagridis     | .....K     | VVFLGD         | YVDR     | ..GKFSLEVI | SILFSLKIMFP | DKIFLL      |            |             |           |        |
| Cr. hominis         | .....A     | DFKN           | ..WDDFDS | YVFMG      | GFASES      | ..SPYALEFAL | LLFAMKVLFP | YHVFL       |           |        |
| Cr. parvum          | .....K     | VVFLGD         | YVDR     | ..GKFSLEVI | SILFSLKIMFP | DKIFLL      |            |             |           |        |
| Cr. tyzzeri         | .....K     | VVFLGD         | YVDR     | ..GKFSLEVI | SILFSLKIMFP | DKIFLL      |            |             |           |        |
| Cr. sp. chipmunk    | .....K     | VVFLGD         | YVDR     | ..GKFSLEVI | SILFSLKIMFP | DKIFLL      |            |             |           |        |
| Cr. ryanae          | .....K     | VVFLGD         | YVDR     | ..GKFSLEVI | SILFSLKIMFP | DKIFLL      |            |             |           |        |
| Cr. bovis           | .....K     | VVFLGD         | YVDR     | ..GKFSLEVI | SILFSLKIMFP | DKIFLL      |            |             |           |        |
| Cyc. cayetanensis   | .....S     | LLFLGD         | YVDR     | ..GHC      | SCEVLL      | LLLSFKVLP   | NRVWL      |             |           |        |
| Cys. suis           | .....D     | FLFLGD         | YVDR     | ..GEC      | SLEVI       | LLFSLKILFP  | SRVFL      |             |           |        |
| Cyt. felis          | .....N     | NLNLC          | ..IPIKI  | YIFISG     | FINNN       | ..NKINLEYL  | LLFSLKILFP | YHYFI       |           |        |
| E. tenella          | .....S     | LLFLGD         | FVDR     | ..GIF      | SCEVLL      | LLLSFKVLP   | DKVWL      |             |           |        |
| E. falciformis      | .....S     | LVFLGD         | YVDR     | ..GQF      | SCEVLL      | LLFALKVLP   | SHVWL      |             |           |        |
| H. hammondi         | .....D     | FLFLGD         | YVDR     | ..GPC      | SLEVLL      | LLFSLKVLFP  | HRVFL      |             |           |        |
| N. caninum          | .....D     | FLFLGD         | YVDR     | ..GPC      | SLEVLL      | LLFSLKVLFP  | NRVFL      |             |           |        |
| P. falciparum       | N.....D    | NDIKY          | VFLGN    | LI NR      | ..GNYSLEVI  | CLFSLKILFP  | PKHIYLL    |             |           |        |
| P. praefalciparum   | N.....D    | NDIKY          | VFLGN    | LI NR      | ..GNYSLEVI  | CLFSLKILFP  | PKHIYLL    |             |           |        |
| P. reichenowi       | N.....D    | NDIKY          | VFLGN    | LI NR      | ..GNYSLEVI  | CLFSLKILFP  | PKHIYLL    |             |           |        |
| P. blacklocki       | N.....D    | NDIKY          | VFLGN    | LI NR      | ..GNYSLEVI  | CLFSLKILFP  | PKHIYLL    |             |           |        |
| P. billcollinsi     | N.....D    | NDIKY          | VFLGN    | LI NR      | ..GNYSLEVI  | CLFSLKILFP  | PKHIYLL    |             |           |        |
| P. adleri           | N.....D    | NDIKY          | VFLGN    | LI NR      | ..GNYSLEVI  | CLFSLKILFP  | PKHIYLL    |             |           |        |
| P. gaboni           | N.....D    | NDIKY          | VFLGN    | LI NR      | ..GNYSLEVI  | CLFSLKILFP  | PKHIYLL    |             |           |        |
| P. gallinaceum      | N.....E    | NDV            | VFLGN    | YV NR      | ..GDYSLEVI  | CLFSLKILFP  | PKHIYLL    |             |           |        |
| P. vivax            | TSVSV      | GREKEA         | APHTGS   | NDV        | YVFLGN      | YI NR       | ..GKHSLEVI | CLLSLKVLP   | PKHIYLL   |        |
| P. fragile          | H.....E    | KDV            | VFLGN    | YV NR      | ..GNHSLEVI  | CLLSLKVLP   | PKHIYLL    |             |           |        |
| P. knowlesi         | H.....D    | KDI            | VFLGN    | YI NR      | ..GDYSLEVI  | CLLSLKVLP   | PKHIYLL    |             |           |        |
| P. coatneyi         | Q.....D    | NDV            | VFLGN    | YI NR      | ..GKHSLEVI  | CLLSLKVLP   | PKHIYLL    |             |           |        |
| Th. parva           | ...KTGT    | LNFKNN         | CFQFNCS  | YLF        | FG          | FVSDS       | ..SSF      | CLEFV       | LLFALKVLP | PHVYFL |
| Th. annulata        | ...KNGT    | LNFKNN         | TWFQFKS  | YIF        | FG          | FVSEL       | ..SSF      | CLEFV       | LLFALKVLP | PHVYFL |
| Th. orientalis      | .....A     | DFKN           | ..WDDFDS | YVFMG      | GFASES      | ..SPYALEFAL | LLFAMKVLFP | YHVFL       |           |        |
| Th. equi            | .....C     | NNDQ           | SSPMGEP  | VS         | IFVG        | NFTSDT      | ..RVFSLEFL | TFLFSLKILFP | PHVYFL    |        |
| To. gondii          | .....D     | FLFLGD         | YVDR     | ..GPC      | SLEVLL      | LLFSLKVLFP  | HRVFL      |             |           |        |
| V. brassicaformis   | .....N     | YVFLGD         | YVDR     | ..GA       | FSLEVV      | LLFALKVLP   | PHVYFL     |             |           |        |
| S. cerevisiae. PPT1 | .....Y     | LFNG           | FVDR     | ..GS       | WSCEVA      | LFPYCL      | KILHP      | NRVFL       |           |        |

|                   | 120      | 130    | 140   | 150  | 160   | 170   |       |      |    |         |         |         |        |     |       |       |       |   |       |       |   |       |       |   |   |   |   |   |   |   |     |   |   |   |   |   |   |   |   |   |   |   |   |   |   |   |   |   |   |   |   |   |   |   |
|-------------------|----------|--------|-------|------|-------|-------|-------|------|----|---------|---------|---------|--------|-----|-------|-------|-------|---|-------|-------|---|-------|-------|---|---|---|---|---|---|---|-----|---|---|---|---|---|---|---|---|---|---|---|---|---|---|---|---|---|---|---|---|---|---|---|
| B. sp. xinjiang   | ..RGGRE  | ARRHR  | DYKSP | LFR  | EICTK | LLRDN | ARM   | LKLG | N  | ..DEALL | VQSAHE  | LYH     | R      | IYD | VFNLS |       |       |   |       |       |   |       |       |   |   |   |   |   |   |   |     |   |   |   |   |   |   |   |   |   |   |   |   |   |   |   |   |   |   |   |   |   |   |   |
| B. bigemina       | ..RGRRE  | ARRRR  | DYKSA | LFR  | EIYAK | L     | SGNAR | Q    | LK | LAD     | ..DEALL | VQSAHE  | LYH    | R   | IYD   | VFNLS |       |   |       |       |   |       |       |   |   |   |   |   |   |   |     |   |   |   |   |   |   |   |   |   |   |   |   |   |   |   |   |   |   |   |   |   |   |   |
| B. ovata          | ..RGRRE  | ARRRD  | DYKSA | LFR  | EIYAK | L     | SDNAR | Q    | LK | LAE     | ..DEALL | VQSAHE  | LYH    | R   | IYD   | VFNLS |       |   |       |       |   |       |       |   |   |   |   |   |   |   |     |   |   |   |   |   |   |   |   |   |   |   |   |   |   |   |   |   |   |   |   |   |   |   |
| B. divergens      | ..RGRRE  | ARRRD  | DYKSA | LFR  | EIHSK | L     | ARKAA | F    | LK | L       | ..DDALL | VQSAHE  | LYH    | R   | IYD   | VFNLS |       |   |       |       |   |       |       |   |   |   |   |   |   |   |     |   |   |   |   |   |   |   |   |   |   |   |   |   |   |   |   |   |   |   |   |   |   |   |
| B. bovis          | ..RGSRE  | S      | THRN  | YSAL | FR    | ELYSK | L     | RTNA | V  | LK      | L       | ..DDALL | VQSAHE | LYH | R     | IYD   | VFNLS |   |       |       |   |       |       |   |   |   |   |   |   |   |     |   |   |   |   |   |   |   |   |   |   |   |   |   |   |   |   |   |   |   |   |   |   |   |
| B. microti        | Y        | YEKSSN | PID   | T    | YNCH  | L     | YND   | I    | LN | K       | L       | SKYHN   | N      | F   | N     | L     | Q     | S | D     | K     | A | L     | I     | S | Q | A | K | E | L | L | N   | K | I | I | D | F | V | M | P |   |   |   |   |   |   |   |   |   |   |   |   |   |   |   |
| Be. besnoiti      | ..RGNHED | R      | Q     | M    | N     | R     | D     | Y    | G  | F       | F       | E       | L      | Q   | R     | K     | L     | G | ..... | E     | A | S     | E     | M | L | W | E | K | S | N | D   | V | F | D | L | L | P |   |   |   |   |   |   |   |   |   |   |   |   |   |   |   |   |   |
| Ch. velia         | ..RGNHED | R      | A     | M    | N     | A     | N     | Y    | G  | F       | K       | A       | E      | C   | Q     | S     | K     | L | G     | ..... | G | E     | S     | V | W | Q | R | V | N | D | V   | F | F | L | P |   |   |   |   |   |   |   |   |   |   |   |   |   |   |   |   |   |   |   |
| Cr. muris         | ..RGNHED | P      | L     | M    | N     | L     | S     | Y    | G  | F       | H       | T       | E      | C   | V     | R     | K     | Y | G     | S     | H | Y     | ..... | G | H | L | W | E | R | V | N   | D | V | F | F | L | P |   |   |   |   |   |   |   |   |   |   |   |   |   |   |   |   |   |
| Cr. andersoni     | ..RGNHED | P      | L     | M    | N     | L     | S     | Y    | G  | F       | H       | T       | E      | C   | V     | R     | K     | Y | G     | S     | H | Y     | ..... | G | H | L | W | E | R | V | N   | D | V | F | F | L | P |   |   |   |   |   |   |   |   |   |   |   |   |   |   |   |   |   |
| Cr. ubiquitum     | ..RGNHED | S      | S     | I    | N     | S     | T     | F    | G  | F       | H       | L       | E      | C   | K     | Q     | K     | F | G     | V     | N | ..... | G     | E | A | V | W | E | R | I | N   | D | A | F | E | F | L | P |   |   |   |   |   |   |   |   |   |   |   |   |   |   |   |   |
| Cr. meleagridis   | ..RGNHED | A      | S     | V    | N     | L     | T     | Y    | G  | F       | H       | F       | E      | C   | K     | Q     | K     | F | G     | V     | D | ..... | G     | E | A | V | W | E | R | I | N   | D | A | F | E | F | L | P |   |   |   |   |   |   |   |   |   |   |   |   |   |   |   |   |
| Cr. hominis       | ..RGNHED | A      | S     | V    | N     | L     | T     | Y    | G  | F       | H       | F       | E      | C   | K     | Q     | K     | F | G     | M     | N | ..... | G     | E | T | I | W | E | R | I | N   | D | A | F | E | F | L | P |   |   |   |   |   |   |   |   |   |   |   |   |   |   |   |   |
| Cr. parvum        | ..RGNHED | A      | S     | V    | N     | L     | T     | Y    | G  | F       | H       | F       | E      | C   | K     | Q     | K     | F | G     | I     | N | ..... | G     | E | A | I | W | E | R | I | N   | D | A | F | E | F | L | P |   |   |   |   |   |   |   |   |   |   |   |   |   |   |   |   |
| Cr. tyzzeri       | ..RGNHED | A      | S     | V    | N     | L     | T     | Y    | G  | F       | H       | F       | E      | C   | K     | Q     | K     | F | G     | M     | N | ..... | G     | E | A | I | W | E | R | I | N   | D | A | F | E | F | L | P |   |   |   |   |   |   |   |   |   |   |   |   |   |   |   |   |
| Cr. sp. chipmunk  | ..RGNHED | A      | S     | I    | N     | S     | T     | F    | G  | F       | H       | L       | E      | C   | K     | Q     | K     | F | G     | M     | N | ..... | G     | E | A | I | W | E | R | I | N   | D | A | F | E | F | L | P |   |   |   |   |   |   |   |   |   |   |   |   |   |   |   |   |
| Cr. ryanae        | ..RGNHED | V      | S     | I    | N     | S     | S     | G    | L  | D       | E       | C       | N      | K   | K     | F     | G     | S | N     | ..... | G | Q     | F     | L | W | E | R | I | N | D | V   | F | F | L | P |   |   |   |   |   |   |   |   |   |   |   |   |   |   |   |   |   |   |   |
| Cr. bovis         | ..RGNHED | I      | S     | I    | N     | V     | S     | G    | L  | D       | E       | C       | N      | K   | K     | F     | G     | S | N     | ..... | G | Q     | F     | L | W | E | R | I | N | D | V   | F | F | L | P |   |   |   |   |   |   |   |   |   |   |   |   |   |   |   |   |   |   |   |
| Cyc. cayetanensis | ..RGNHED | R      | P     | M    | N     | I     | Y     | G    | F  | F       | S       | E       | C      | V   | C     | K     | F     | G | ..... | T     | E | G     | E     | I | L | W | K | R | S | N | S   | L | F | D | F | L | P |   |   |   |   |   |   |   |   |   |   |   |   |   |   |   |   |   |
| Cys. suis         | ..RGNHED | R      | A     | M    | N     | A     | D     | Y    | G  | F       | A       | E       | I      | E   | K     | L     | G     | V | Y     | G     | G | D     | ..... | M | K | A | R | L | V | Q | C   | A | N | D | V | F | D | L | P |   |   |   |   |   |   |   |   |   |   |   |   |   |   |   |
| Cyt. felis        | ..CGD    | Y      | E     | N    | L     | I     | N     | K    | L  | N       | L       | N       | Y      | I   | N     | I     | N     | L | I     | N     | N | Y     | N     | K | L | I | N | E | I | L | I   | Q | S | T | N | E | L | I | N | K | I | N | F | N | Y | M | S |   |   |   |   |   |   |   |
| E. tenella        | ..RGNHED | R      | P     | M    | N     | I     | Y     | G    | F  | Y       | A       | E       | C      | V   | S     | K     | L     | G | ..... | T     | E | G     | E     | L | W | K | R | S | N | S | L   | F | D | F | L | P |   |   |   |   |   |   |   |   |   |   |   |   |   |   |   |   |   |   |
| E. falciformis    | ..RGNHED | R      | P     | M    | N     | I     | Y     | G    | F  | Y       | S       | E       | C      | L   | L     | K     | F     | G | ..... | I     | E | G     | E     | L | W | K | R | S | N | S | L   | F | D | F | L | P |   |   |   |   |   |   |   |   |   |   |   |   |   |   |   |   |   |   |
| H. hammondi       | ..RGNHED | R      | Q     | M    | N     | R     | T     | Y    | G  | F       | L       | Q       | E      | L   | E     | R     | K     | L | G     | ..... | A | A     | S     | A | C | V | W | E | K | A | N   | A | V | F | D | L | L | P |   |   |   |   |   |   |   |   |   |   |   |   |   |   |   |   |
| N. caninum        | ..RGNHED | R      | Q     | M    | N     | R     | V     | Y    | G  | F       | L       | E       | E      | L   | E     | R     | K     | L | G     | ..... | D | A     | S     | T | R | V | W | E | K | A | N   | E | V | D | F | L | L | P |   |   |   |   |   |   |   |   |   |   |   |   |   |   |   |   |
| P. falciparum     | ..RGNHED | R      | L     | F    | N     | Y     | I     | Y    | G  | F       | Y       | K       | D      | I   | E     | I     | K     | M | K     | T     | N | M     | E     | Y | M | G | I | I | N | Y | Q   | E | V | I | S | A | H | S | Y | E | L | F | N | R | I | N | D | V | F | F | L | P |   |   |
| P. praefalciparum | ..RGNHED | R      | L     | F    | N     | Y     | I     | Y    | G  | F       | Y       | K       | D      | I   | E     | I     | K     | M | K     | T     | N | M     | E     | Y | M | G | I | I | N | Y | Q   | E | V | I | S | A | H | S | Y | E | L | F | N | R | I | N | D | V | F | F | L | P |   |   |
| P. reichenowi     | ..RGNHED | R      | L     | F    | N     | Y     | I     | Y    | G  | F       | Y       | K       | D      | I   | E     | I     | K     | M | K     | T     | N | M     | E     | Y | M | G | I | I | N | Y | Q   | E | V | I | S | A | H | S | Y | E | L | F | N | R | I | N | D | V | F | F | L | P |   |   |
| P. blacklocki     | ..RGNHED | R      | L     | F    | N     | Y     | I     | Y    | G  | F       | Y       | K       | D      | I   | E     | I     | K     | M | K     | T     | N | M     | E     | Y | M | G | I | I | N | Y | Q   | E | V | I | S | A | H | S | Y | E | L | F | N | R | I | N | D | V | F | F | L | P |   |   |
| P. billcollinsi   | ..RGNHED | R      | L     | F    | N     | Y     | I     | Y    | G  | F       | Y       | K       | D      | I   | E     | I     | K     | M | K     | T     | N | M     | E     | Y | M | G | I | I | N | Y | Q   | E | V | I | S | A | H | S | Y | E | L | F | N | R | I | N | D | V | F | F | L | P |   |   |
| P. adleri         | ..RGNHED | R      | L     | F    | N     | Y     | I     | Y    | G  | F       | Y       | K       | D      | I   | E     | I     | K     | M | K     | T     | N | M     | E     | Y | M | G | I | I | N | Y | Q   | E | V | I | S | A | H | S | Y | E | L | F | N | R | I | N | D | V | F | F | L | P |   |   |
| P. gaboni         | ..RGNHED | R      | L     | F    | N     | Y     | I     | Y    | G  | F       | Y       | K       | D      | I   | E     | I     | K     | M | K     | T     | N | M     | E     | Y | M | G | I | I | N | Y | Q   | E | V | I | S | A | H | S | Y | E | L | F | N | R | I | N | D | V | F | F | L | P |   |   |
| P. gallinaceum    | ..RGNHED | R      | L     | F    | N     | Y     | I     | Y    | G  | F       | Y       | K       | D      | I   | E     | I     | K     | M | K     | M     | N | I     | E     | T | M | G | L | I | N | Y | Q   | E | V | I | S | A | H | S | Y | E | L | F | N | R | I | N | D | A | L | F | L | P |   |   |
| P. vivax          | ..RGNHED | R      | L     | F    | N     | Y     | V     | N    | G  | F       | Y       | A       | D      | I   | E     | I     | K     | M | K     | R     | N | I     | K     | T | A | G | L | I | K | Y | Q   | E | V | I | A | H | A | Y | E | L | F | N | R | I | N | D | V | L | E | F | L | P |   |   |
| P. fragile        | ..RGNHED | R      | L     | F    | N     | Y     | V     | H    | G  | F       | Y       | A       | D      | I   | E     | I     | K     | M | K     | E     | R | N     | G     | R | V | G | L | I | R | Y | Q   | E | V | I | A | H | A | Y | E | L | F | N | R | I | N | D | V | L | E | F | L | P |   |   |
| P. knowlesi       | ..RGNHED | R      | L     | F    | N     | Y     | V     | H    | G  | F       | Y       | A       | D      | I   | E     | I     | K     | M | K     | E     | R | N     | I     | K | R | G | L | I | R | Y | Q   | E | V | I | A | H | A | Y | E | L | F | N | R | I | N | D | A | L | E | F | L | P |   |   |
| P. coatneyi       | ..RGNHED | R      | L     | F    | N     | Y     | V     | H    | G  | F       | Y       | A       | D      | I   | E     | I     | K     | M | K     | E     | R | N     | I     | K | R | G | L | I | R | Y | Q   | E | V | I | A | H | A | Y | E | L | F | N | R | I | N | D | A | L | E | F | L | P |   |   |
| Th. parva         | ..RSS    | K      | D     | E    | R     | D     | T     | N    | N  | A       | G       | F       | Y      | D   | E     | I     | Y     | R | K     | L     | S | T     | N     | Y | D | S | L | K | L | N | ..D | E | T | L | L | L | Q | C | S | K | E | L | F | H | K | I | N | D | V | F | E | Y | M | S |
| Th. annulata      | ..RSP    | K      | D     | E    | R     | D     | T     | N    | N  | A       | G       | F       | Y      | D   | E     | I     | Y     | R | K     | L     | S | T     | N     | Y | D | S | L | K | L | N | ..E | E | T | L | L | L | Q | C | S | K | E | L | F | H | K | I | N | D | V | F | E | Y | M | S |
| Th. orientalis    | ..RSS    | K      | D     | E    | R     | N     | A     | T    |    |         |         |         |        |     |       |       |       |   |       |       |   |       |       |   |   |   |   |   |   |   |     |   |   |   |   |   |   |   |   |   |   |   |   |   |   |   |   |   |   |   |   |   |   |   |

|                     | 180   | 190     | 200        | 210      |          |         |              |
|---------------------|-------|---------|------------|----------|----------|---------|--------------|
| B. sp. xinjiang     | LAACI | SER.    | ILCIHGSLSK | CFSLDHL  | SNTPKPI  | VTIS    | SSVKDDNQ     |
| B. bigemina         | LA    | AIVDER. | VLCVHGALS  | KAFRSVE  | EQLARV   | KPVI    | VEQTSVKGDNR  |
| B. ovata            | LA    | ALLDER. | VLCVHGALS  | KAFRSVE  | EQLSQL   | KPII    | IVERTSVKGDNR |
| B. divergens        | IS    | ACIEDR. | VLCLHGSLS  | KAFRSIE  | EQLETS   | KPII    | ISTKTNCRTRTG |
| B. bovis            | LS    | ACISDR. | VLCLHGSLS  | PFSLSL   | NSLATIP  | KPLV    | LS.SSRDD     |
| B. microti          | KG    | ALVDQS. | ILVKGV     | PSDCD    | GVFGKYS  | MNKY    |              |
| Be. besnoiti        | LA    | AFVPTAG | LFCLHG     | CLGDSIES | INDLRS   | ERPL    | HVSALNLG     |
| Ch. velia           | LA    | ALVEDS. | VLCVHG     | IGSVQSL  | ADLQGT   | KPIS    | V.ISEIKEDT   |
| Cr. muris           | LG    | IIVEDQ. | ILCVHGG    | IGKNIQT  | DDIKDTP  | KPIH    | VSSDCFYDNSK  |
| Cr. andersoni       | LG    | IIVEDQ. | ILCVHGG    | IGKNIQT  | DDIKDTP  | KPIH    | VSSDCFYDNSK  |
| Cr. ubiquitum       | IS    | ALIDHQ. | VLCLHSG    | IGKSIK   | NIHISD   | VKPI    | HVKSEELLNKN  |
| Cr. meleagridis     | IS    | ALIDHQ. | VLCLHSG    | IGKSIK   | NIHISD   | VKPI    | HVKSEELLNKN  |
| Cr. hominis         | IS    | ALIDHQ. | VLCLHSG    | IGKSIK   | SVANLSG  | VKPI    | HVKSEELINKS  |
| Cr. parvum          | IS    | ALIDHQ. | VLCLHSG    | IGKSIK   | SVENLSG  | VKPI    | HVKSEELINKS  |
| Cr. tyzzeri         | IS    | ALIDHQ. | VLCLHSG    | IGKSIK   | SVENLSG  | VKPI    | HVKSEELINKS  |
| Cr. sp. chipmunk    | IS    | ALIDHQ. | VLCLHSG    | IGKSIK   | IKKIEHLS | GTPKPI  | HVKSEELFNRI  |
| Cr. ryanae          | LA    | ILINDS. | IMCLHSG    | IGKNIK   | KLHLEN   | ISKPI   | HVSS.DFLIRE  |
| Cr. bovis           | LA    | VLVNDR. | ILCLHSG    | IGKSIK   | KLHLEN   | ISKPI   | HVSS.DLLIRG  |
| Cyc. cayetanensis   | LA    | ATVRSAG | LILLHGG    | IGDSIQ   | APQQLRD  | IRKPI   | ITVP.QHVD    |
| Cys. suis           | LG    | AHPAAR  | IFCLHG     | CLGNSRL  | LI       | DDLRLTR | PIQVAGTDIDR  |
| Cyt. felis          | IA    | IYINNN. | ILCINGL    | IS       | ..PQ     | FNNLN   | LYTKKPIGNNL  |
| E. tenella          | LA    | AVRADG  | LFFFHGG    | IGDSTL   | SQQKEL   | QKPI    | ITVP.QHVD    |
| P. falciiformis     | LA    | AVPSAG  | VLLHGG     | IGDSTL   | TVQQLKG  | IPKPI   | ITVP.QHVD    |
| H. hammondi         | LA    | ALVPAAA | VVCLHG     | CLGDSIE  | KVEDLRA  | IRPLD   | VCAIQVE      |
| N. caninum          | LA    | ALVPVAG | VFCLHG     | CLGDSIE  | TVDDLRL  | VIRPLD  | ISVQLD       |
| P. falciiparum      | LC    | VLLDKN. | ILCIHGG    | IGDSVMTI | SDYQHT   | IRKPI   | LIPQNVDR     |
| P. praefalciiparum  | LC    | VLLDKN. | ILCIHGG    | IGDSVMTI | SDYQHT   | IRKPI   | LIPQNVDR     |
| P. reichenowi       | LC    | VLLDKN. | ILCIHGG    | IGDSVMTI | SDYQHT   | IRKPI   | LIPQNVDR     |
| P. blacklocki       | LC    | VLLDKN. | ILCIHGG    | IGDSVMTI | SDYQHT   | IRKPI   | LIPQNVDR     |
| P. billcollinsi     | LC    | VLLDKN. | ILCIHGG    | IGDSVMTI | SDYQHT   | IRKPI   | LIPQNVDR     |
| P. adleri           | LC    | VLLDKN. | ILCIHGG    | IGDSVMTI | SDYQHT   | IRKPI   | LIPQNVDR     |
| P. gaboni           | LC    | VLLDKN. | ILCIHGG    | IGDSVMTI | SDYQHT   | IRKPI   | LIPQNVDR     |
| P. gallinaceum      | LS    | ALLDKN. | ILCIHGG    | IGDSVMTI | SDYQHT   | IRKPI   | LIPQNVDR     |
| P. vivax            | LS    | VLVGGN. | ILCVHAG    | IGDSLQNV | GDFAAIT  | PKPI    | IVTPQFVNR    |
| P. fragile          | LS    | VLVGGN. | ILCVHAG    | IGDSLQNV | GDFAAIT  | PKPI    | IVTPQFVNR    |
| P. knowlesi         | LS    | VLVGGN. | ILCVHAG    | IGDSLQNV | GDFAAIT  | PKPI    | IVTPQFVNR    |
| P. coatneyi         | LS    | VLVGGN. | ILCVHAG    | IGDSLQNV | GDFAAIT  | PKPI    | IVTPQFVNR    |
| Th. parva           | VC    | AVLNQE. | VLCVDKL    | TSN      | ..FNL    | SKLENL  | NRPLT        |
| Th. annulata        | LC    | AVLNQE. | VLCVDKL    | TNK      | ..FSL    | SKLEEN  | LNRPL        |
| Th. orientalis      | VG    | AVLNKE. | ILCVDKL    | TKD      | ..FSY    | KRLGKIP | KPLNLA       |
| Th. equi            | IA    | AISDK.  | VLCLYGT    | IS       | ..SEL    | LNVRDEL | LFVPKPI      |
| To. gondii          | LA    | ALVPAAA | VVCLHG     | CLGDSIE  | KVEDLRA  | IRPLD   | VCAIQME      |
| V. brassicaformis   | LA    | ALVDGQ. | IFAIHGG    | IGDSTL   | ISVDDL   | LRKPI   | INIPISNLHPA  |
| S. cerevisiae. PPT1 | LA    | TLI     | NDY        | LVMHGL   | PSD      | SATL    | SDFKNID      |

|                     | 220  | 230    | 240     | 250    |       |       |        |           |        |        |
|---------------------|------|--------|---------|--------|-------|-------|--------|-----------|--------|--------|
| B. sp. xinjiang     | .... | AMVA   | AYTNLHT | RNALF  | ....  | SSLSP | VAYDGS | EDQFHVK   | F      | TEDAM  |
| B. bigemina         | .... | SRGAY  | ANVHVR  | NACF   | ....  | GTLS  | SDTVAD | ASGEQFHAD | F      | TEREL  |
| B. ovata            | .... | SLGAYS | NVHVR   | NAFF   | ....  | GTLS  | DVAVNG | SDEQFHVD  | F      | TEKEL  |
| B. divergens        | .... | VTGF   | EGNTHL  | QHALF  | ....  | GTFS  | PAS    | EDDVE     | WYPNF  | TQEEF  |
| B. bovis            | .... | IGYCS  | NHAR    | HALL   | ....  | GTLS  | ..SDD  | DANRF     | HVE    | FNKAD  |
| B. microti          | .... | ....   | ....    | ....   | ....  | ....  | ....   | ....      | ....   | IPRLT  |
| Be. besnoiti        | NR   | ..VMD  | CLWSD   | PE     | ....  | RPA   | ERGED  | AVG       | ..PAS  | PRG    |
| Ch. velia           | .... | VLD    | CLWSD   | PTEND  | ....  | SVT   | GTHPS  | PRGQ      | ....   | NCRF   |
| Cr. muris           | NVER | KILD   | CLWSD   | PI     | ....  | INDE  | KY     | LYNET     | DVDC   | ITNNS  |
| Cr. andersoni       | NVER | KILD   | CLWSD   | PI     | ....  | INDE  | KY     | LYNET     | DVDC   | ITNNS  |
| Cr. ubiquitum       | DR   | ..RV   | FD      | CLW    | SGIIE | EKS   | ..NF   | DDSHN     | HLNE   | ADV    |
| Cr. meleagridis     | DR   | ..YV   | FE      | CLW    | SEMI  | IDQT  | ..SF   | YDSON     | FINET  | DVEH   |
| Cr. hominis         | DR   | ..YV   | FE      | CLW    | SEMI  | IDQT  | ..SF   | YDSON     | FINET  | DVEH   |
| Cr. parvum          | DR   | ..YV   | FE      | CLW    | SEMI  | IDQT  | ..SF   | YDSON     | FINET  | DVEH   |
| Cr. tyzzeri         | DR   | ..YV   | FE      | CLW    | SEMI  | IDQT  | ..SF   | YDSON     | FINET  | DVEH   |
| Cr. sp. chipmunk    | DR   | ..CV   | FD      | CLW    | SEMI  | IDQA  | ..SF   | YSSR      | NDF    | INET   |
| Cr. ryanae          | EET  | VRLD   | CLW     | SEMI   | IDSN  | NSYN  | FPNEN  | KE        | ..CIN  | ETD    |
| Cr. bovis           | DET  | MRILD  | CLW     | SEMI   | IDSN  | NSYN  | FPNEN  | KE        | ..CIN  | ETD    |
| Cyc. cayetanensis   | CQ   | ..VLD  | CLWSD   | PE     | ....  | TADE  | DGA    | APT       | ..DAS  | PRG    |
| Cys. suis           | CKM  | CLWSD  | PE      | ....   | ..RPP | DNKED | VAG    | ..PDS     | PRG    | ..AHAI |
| Cyt. felis          | .... | ..NN   | IFIND   | ALYGHF | ....  | ..IN  | YDS    | INFP      | CKNNG  | LNIN   |
| E. tenella          | CR   | ..IID  | CLWSD   | PV     | ....  | ..SPE | E      | GEGE      | KTES   | VKSS   |
| E. falciiformis     | CQ   | ..VVD  | CLWSD   | PE     | ....  | IEAS  | QGD    | NPE       | EGQDES | PRG    |
| H. hammondi         | RK   | ..VLA  | CLWSD   | PE     | ....  | ..RPP | ERA    | ED        | VDG    | ..PTS  |
| N. caninum          | HK   | ..VLD  | CLWSD   | PE     | ....  | ..RPP | ERA    | EDA       | AAG    | ..PAS  |
| P. falciiparum      | KK   | ..IID  | T       | LWSD   | PI    | INYN  | ..DEL  | D         | LQ     | LLK    |
| P. praefalciiparum  | KK   | ..IID  | T       | LWSD   | PI    | INYN  | ..DEL  | D         | LQ     | LLK    |
| P. reichenowi       | KK   | ..IID  | T       | LWSD   | PI    | INYN  | ..DEL  | D         | LQ     | LLK    |
| P. blacklocki       | KK   | ..IID  | T       | LWSD   | PI    | INYN  | ..DEL  | D         | LQ     | LLK    |
| P. billcollinsi     | KK   | ..IID  | T       | LWSD   | PI    | INYN  | ..DEL  | D         | LQ     | LLK    |
| P. adleri           | KK   | ..IID  | T       | LWSD   | PI    | INYN  | ..DEL  | D         | LQ     | LLK    |
| P. gaboni           | KK   | ..IID  | T       | LWSD   | PI    | INYN  | ..DEL  | D         | LQ     | LLK    |
| P. gallinaceum      | KK   | ..IID  | T       | LWSD   | PI    | INYN  | ..DEL  | D         | LQ     | LLK    |
| P. vivax            | QK   | ..VID  | A       | LWSD   | PI    | INYE  | ..DE   | Q         | D      | V      |
| P. fragile          | HK   | ..IIV  | D       | LWSD   | PI    | INYE  | ..DE   | Q         | D      | M      |
| P. knowlesi         | QK   | ..IID  | T       | LWSD   | PI    | INYE  | ..DE   | Q         | D      | M      |
| P. coatneyi         | QK   | ..IID  | T       | LWSD   | PI    | INYE  | ..DE   | Q         | D      | M      |
| Th. parva           | .... | ..IY   | EL      | LFEN   | KN    | PGDK  | ....   | ..TT      | NN     | EG     |
| Th. annulata        | .... | ..VY   | EL      | LFEN   | KN    | PGDK  | ....   | ..TT      | NN     | EG     |
| Th. orientalis      | .... | ..VY   | EL      | LFEN   | KN    | PGDK  | ....   | ..TT      | NN     | EG     |
| Th. equi            | .... | ..VIF  | S       | REV    | SGKI  | Y     | ....   | ..YH      | NN     | VH     |
| To. gondii          | RK   | ..VLA  | CLWSD   | PE     | ....  | ..RPP | ERA    | ED        | VDG    | ..PTS  |
| V. brassicaformis   | .... | ..ILD  | A       | LWSD   | PTD   | SE    | ....   | ..EH      | FG     | T      |
| S. cerevisiae. PPT1 | .... | ..ME   | L       | WAD    | P     | Q     | EAN    | ....      | ..GM   | P      |

|                            | 260      | 270       | 280    | 290   | 300    | 310     |
|----------------------------|----------|-----------|--------|-------|--------|---------|
| <i>B. sp. xinjiang</i>     | IRCLDLA  | GVSLVTS   | GSVAD  | CGYSV | VYGD   | RVLQLG  |
| <i>B. bigemina</i>         | AYCMRRG  | VEMLITAG  | PPTE   | RGYS  | YAYGD  | RVLQLG  |
| <i>B. ovata</i>            | AYCMRRG  | IEMLITAG  | PTTES  | RGYS  | YAFGD  | RVLQLG  |
| <i>B. divergens</i>        | TSSLRAAG | ISMLITAG  | STTER  | GYNY  | LYGER  | RVLQLG  |
| <i>B. bovis</i>            | IASLDLS  | GISLVTG   | CTAEC  | GYCY  | MHDE   | RVLQLG  |
| <i>B. microti</i>          | IPHSDC   | STSLVLS   | ENLAS  | LNPS  | SGCYN  | RVIPLTN |
| <i>Be. besnoiti</i>        | ESFLDRN  | RLALLVR   | GHECV  | VAPGY | YDLGG  | RCLTLF  |
| <i>Ch. velia</i>           | GAFCERN  | LQLIIRAH  | ECV    | ASGFE | YFAGG  | KLLTVF  |
| <i>Cr. muris</i>           | DAFMNNT  | GIKLIVRAH | ECIP   | NGYE  | YFANG  | KVLTTF  |
| <i>Cr. andersoni</i>       | DAFMNNT  | GIKLIVRAH | ECIP   | NGYE  | YFANG  | KVLTTF  |
| <i>Cr. ubiquitum</i>       | EDFMNKN  | SIKLIIRT  | TNDY   | CKGGY | YNANG  | RVVSLT  |
| <i>Cr. meleagridis</i>     | EDFMNKN  | SIKLIIRT  | TNDY   | CKGGY | YNANG  | RVVSLN  |
| <i>Cr. hominis</i>         | EDFMNKN  | SIKLIIRT  | TNDY   | CKGGY | YNANG  | RVVSLN  |
| <i>Cr. parvum</i>          | EDFMNKN  | SIKLIIRT  | TNDY   | CKGGY | YNANG  | RVVSLN  |
| <i>Cr. tyzzeri</i>         | EDFMNKN  | SIKLIIRT  | TNDY   | CKGGY | YNANG  | RVVSLN  |
| <i>Cr. sp. chipmunk</i>    | EEFMNKN  | SIKLIIRT  | TNNY   | CKGGY | YSANN  | RVVSLN  |
| <i>Cr. ryanae</i>          | VNFISSN  | NDIELIVR  | TSEN   | CRNGE | ESHAN  | KIITVT  |
| <i>Cr. bovis</i>           | SNFISSN  | NDIELIVR  | TSEY   | CKNGE | SHGNG  | KIITVT  |
| <i>Cyc. cayetanensis</i>   | RSFLAAN  | SQQLLIRAH | ECV    | SGAF  | YACGAL | CCLTLF  |
| <i>Cys. suis</i>           | REFLKRN  | QLHLLIRAH | ECV    | PLGKY | YDLGG  | CCLTLF  |
| <i>Cyt. felis</i>          | FKLTG    | IKILITN   | NRK    | KLKSG | KYF    | NHKLQLS |
| <i>E. tenella</i>          | FLAANN   | NYKLLIR   | GHECV  | SRGAF | FACGS  | RCLTLF  |
| <i>E. falciformis</i>      | EAFLERN  | QLALLVR   | RAHECV | VAPGY | YDLGG  | RCLTLF  |
| <i>H. hammondi</i>         | EAFLERN  | QLALLVR   | RAHECV | VAPGY | YDLGG  | RCLTLF  |
| <i>N. caninum</i>          | NDFLKNN  | QLKLIIR   | GHECV  | QEGYK | YSYKR  | KLLTLF  |
| <i>P. falciparum</i>       | NDFLKNN  | QLKLIIR   | GHECV  | QEGYK | YSYKR  | KLLTLF  |
| <i>P. praefalciparum</i>   | NDFLKNN  | QLKLIIR   | GHECV  | QEGYK | YSYKR  | KLLTLF  |
| <i>P. reichenowi</i>       | NDFLKNN  | QLKLIIR   | GHECV  | QEGYK | YSYKR  | KLLTLF  |
| <i>P. blacklocki</i>       | NDFLKNN  | QLKLIIR   | GHECV  | QEGYK | YSYKR  | KLLTLF  |
| <i>P. billcollinsi</i>     | NDFLKNN  | QLKLIIR   | GHECV  | QEGYK | YSYKR  | KLLTLF  |
| <i>P. adleri</i>           | NDFLKNN  | QLKLIIR   | GHECV  | QEGYK | YSYKR  | KLLTLF  |
| <i>P. gaboni</i>           | NDFLKNN  | QLKLIIR   | GHECV  | QEGYK | YSYKR  | KLLTLF  |
| <i>P. gallinaceum</i>      | YNFLKNN  | QLKMIIR   | GHECV  | HEGYK | YTFKK  | KLLTLF  |
| <i>P. vivax</i>            | SSFLRRN  | KLKMLIR   | GHECV  | QEGFR | YSYGR  | RLLTLF  |
| <i>P. fragile</i>          | SSFLKKN  | KLKMLIR   | GHECV  | QEGFR | YSYGR  | RLLTLF  |
| <i>P. knowlesi</i>         | SCFLKKN  | KLKMIIR   | GHECV  | QEGFR | YSYGR  | RLLTLF  |
| <i>P. coatneyi</i>         | SSFLKRN  | KLKMLIR   | GHECV  | QEGFR | YSYGR  | RLLTLF  |
| <i>Th. parva</i>           | FGLGEAK  | NFKMVIC   | SSD    | SLDT  | GFKY   | TFNNK   |
| <i>Th. annulata</i>        | FDLGEAK  | NFKMVIC   | SSD    | SLDT  | GFKY   | TFNNK   |
| <i>Th. orientalis</i>      | WELGDAS  | RFRMVIC   | SSDK   | LDA   | GFKY   | LLDNR   |
| <i>Th. equi</i>            | LKKAG    | IKMLIS    | CDEN   | LRSGY | EYSHN  | STVLR   |
| <i>To. gondii</i>          | EAFLERN  | QLALLVR   | RAHECV | VAPGY | YDLGG  | RCLTLF  |
| <i>V. brassicaformis</i>   | MDFCERN  | QLKMLIR   | RAHECV | KYGYE | WFARN  | RLLTVF  |
| <i>S. cerevisiae. PPT1</i> | DRFLRNN  | KLKIFR    | SHELR  | MGVQ  | FEQKG  | KLMTVF  |

320

|                            |                           |
|----------------------------|---------------------------|
| <i>B. sp. xinjiang</i>     | .....YFITHRSLP.....       |
| <i>B. bigemina</i>         | .....YFITHRSLP.....       |
| <i>B. ovata</i>            | .....YVITHRSIK.....       |
| <i>B. divergens</i>        | .....YFLIHRSIQ.....       |
| <i>B. bovis</i>            | .....YFITHRSLP.....       |
| <i>B. microti</i>          | .....YFITHRSLP.....       |
| <i>Be. besnoiti</i>        | .....EEEPGALGKPR.....     |
| <i>Ch. velia</i>           | .....DNLIHFNQIIKYYK.....  |
| <i>Cr. muris</i>           | .....NDLIHFNQIIKYYK.....  |
| <i>Cr. andersoni</i>       | .....NELIQYNQII.....      |
| <i>Cr. ubiquitum</i>       | .....NELIQYNQII.....      |
| <i>Cr. meleagridis</i>     | .....SQLIQYNQII.....      |
| <i>Cr. hominis</i>         | .....NQLIQYNQII.....      |
| <i>Cr. parvum</i>          | .....NQLIQYNQII.....      |
| <i>Cr. tyzzeri</i>         | .....NQLIQYNQII.....      |
| <i>Cr. sp. chipmunk</i>    | .....NQLIQYNQII.....      |
| <i>Cr. ryanae</i>          | .....GNLLKFIQTLKFEE.....  |
| <i>Cr. bovis</i>           | .....GDLMKFIQTLKFEE.....  |
| <i>Cyc. cayetanensis</i>   | .....TTGSLVVHT.....       |
| <i>Cys. suis</i>           | EGGGEEDESPFGAMIPROP.....  |
| <i>Cyt. felis</i>          | .....NVIIHHTLKLKH.....    |
| <i>E. tenella</i>          | .....E.....               |
| <i>E. falciformis</i>      | .....E.....               |
| <i>H. hammondi</i>         | .....DCYP. ERGRRRQ.....   |
| <i>N. caninum</i>          | .....EPLP. NPDRPRQ.....   |
| <i>P. falciparum</i>       | .....NIIIFNQILKYQH.....   |
| <i>P. praefalciparum</i>   | .....NIIIFNQILKYQH.....   |
| <i>P. reichenowi</i>       | .....NIIIFNQILKCOH.....   |
| <i>P. blacklocki</i>       | .....NIIIFNQILKYQQ.....   |
| <i>P. billcollinsi</i>     | .....NIVIFNQILKYQHNS..... |
| <i>P. adleri</i>           | .....NIIIFNQILKYQQ.....   |
| <i>P. gaboni</i>           | .....NIIIFNQILKYQQ.....   |
| <i>P. gallinaceum</i>      | .....NIIIFNQILKSDK.....   |
| <i>P. vivax</i>            | .....SIVIFNQIV.....       |
| <i>P. fragile</i>          | .....SIVIFNQIL.....       |
| <i>P. knowlesi</i>         | .....NIIIFNQIL.....       |
| <i>P. coatneyi</i>         | .....SIVIFNQIL.....       |
| <i>Th. parva</i>           | .....MS.....              |
| <i>Th. annulata</i>        | .....MS.....              |
| <i>Th. orientalis</i>      | .....MS.....              |
| <i>Th. equi</i>            | .....MS.....              |
| <i>To. gondii</i>          | .....DCYP. ERGRRRQ.....   |
| <i>V. brassicaformis</i>   | .....GRISTLFLVWGG.....    |
| <i>S. cerevisiae. PPT1</i> | QAGRNDQNLIIETFEAVE.....   |



**SUPPLEMENTARY TABLE 1**

| <b>Genus</b>           | <b>Species</b>        | <b>Gene Name</b>     | <b>Database and Link</b>     |
|------------------------|-----------------------|----------------------|------------------------------|
| <i>Babesia</i>         | <i>sp.Xinjiang</i>    | BXIN_1211            | <a href="#">PiroPlasmaDB</a> |
| <i>Babesia</i>         | <i>bigemina</i>       | BBBOND_0308690       | <a href="#">PiroPlasmaDB</a> |
| <i>Babesia</i>         | <i>ovata</i>          | BOVATA_005300        | <a href="#">PiroPlasmaDB</a> |
| <i>Babesia</i>         | <i>divergens</i>      | Bdiv_035650          | <a href="#">PiroPlasmaDB</a> |
| <i>Babesia</i>         | <i>bovis</i>          | BBOV_III005730       | <a href="#">PiroPlasmaDB</a> |
| <i>Babesia</i>         | <i>microti</i>        | BmR1_04g07705        | <a href="#">PiroPlasmaDB</a> |
| <i>Besnoitia</i>       | <i>besnoiti</i>       | BESB_052670          | <a href="#">ToxoDB</a>       |
| <i>Chromera</i>        | <i>velia</i>          | Cvel_26242           | <a href="#">CryptoDB</a>     |
| <i>Cryptosporidium</i> | <i>muris</i>          | CMU_013180           | <a href="#">CryptoDB</a>     |
| <i>Cryptosporidium</i> | <i>andersoni</i>      | cand_011090          | <a href="#">CryptoDB</a>     |
| <i>Cryptosporidium</i> | <i>ubiquitum</i>      | cubi_00544           | <a href="#">CryptoDB</a>     |
| <i>Cryptosporidium</i> | <i>meleagridis</i>    | CmeUKMEL1_16435      | <a href="#">CryptoDB</a>     |
| <i>Cryptosporidium</i> | <i>hominis</i>        | Chro.20178           | <a href="#">CryptoDB</a>     |
| <i>Cryptosporidium</i> | <i>parvum</i>         | cgd2_1640            | <a href="#">CryptoDB</a>     |
| <i>Cryptosporidium</i> | <i>tyzzeri</i>        | CTYZ_00002404        | <a href="#">CryptoDB</a>     |
| <i>Cryptosporidium</i> | <i>sp. chipmunk</i>   | ELE39_001909         | <a href="#">CryptoDB</a>     |
| <i>Cryptosporidium</i> | <i>ryanae</i>         | FG386_002506         | <a href="#">CryptoDB</a>     |
| <i>Cryptosporidium</i> | <i>bovis</i>          | FG379_002252         | <a href="#">CryptoDB</a>     |
| <i>Cyclospora</i>      | <i>cayetanensis</i>   | cyc_07137            | <a href="#">ToxoDB</a>       |
| <i>Cystoisospora</i>   | <i>suis</i>           | CSUI_002264          | <a href="#">ToxoDB</a>       |
| <i>Cytauxzoon</i>      | <i>felis</i>          | CF001583             | <a href="#">PiroPlasmaDB</a> |
| <i>Eimeria</i>         | <i>tenella</i>        | ETH_00036350         | <a href="#">ToxoDB</a>       |
| <i>Eimeria</i>         | <i>falciformis</i>    | EfaB_PLUS_15576.g130 | <a href="#">ToxoDB</a>       |
| <i>Hammondia</i>       | <i>hammondi</i>       | HHA_269460           | <a href="#">ToxoDB</a>       |
| <i>Neospora</i>        | <i>caninum</i>        | NCLIV_036950         | <a href="#">ToxoDB</a>       |
| <i>Plasmodium</i>      | <i>falciparum</i>     | Pf3D7_1018200        | <a href="#">PlasmoDB</a>     |
| <i>Plasmodium</i>      | <i>praefalciparum</i> | PPRFG01_1019300      | <a href="#">PlasmoDB</a>     |
| <i>Plasmodium</i>      | <i>reichenowi</i>     | PRCDC_1017600        | <a href="#">PlasmoDB</a>     |
| <i>Plasmodium</i>      | <i>blacklocki</i>     | PBLACG01_1016600     | <a href="#">PlasmoDB</a>     |
| <i>Plasmodium</i>      | <i>billcollinsi</i>   | PBILCG01_1017200     | <a href="#">PlasmoDB</a>     |
| <i>Plasmodium</i>      | <i>adleri</i>         | PADL01_1016600       | <a href="#">PlasmoDB</a>     |
| <i>Plasmodium</i>      | <i>gaboni</i>         | PGABG01_1016100      | <a href="#">PlasmoDB</a>     |
| <i>Plasmodium</i>      | <i>gallinaceum</i>    | PGAL8A_00477300      | <a href="#">PlasmoDB</a>     |
| <i>Plasmodium</i>      | <i>vivax</i>          | PVP01_0603400        | <a href="#">PlasmoDB</a>     |
| <i>Plasmodium</i>      | <i>fragile</i>        | AK88_04161           | <a href="#">PlasmoDB</a>     |
| <i>Plasmodium</i>      | <i>knowlesi</i>       | PKNH_0602400         | <a href="#">PlasmoDB</a>     |
| <i>Plasmodium</i>      | <i>coatneyi</i>       | PCOAH_00015200       | <a href="#">PlasmoDB</a>     |
| <i>Theileria</i>       | <i>parva</i>          | TpMuguga_02g00379    | <a href="#">PiroPlasmaDB</a> |
| <i>Theileria</i>       | <i>annulata</i>       | TA12865              | <a href="#">PiroPlasmaDB</a> |
| <i>Theileria</i>       | <i>equi</i>           | BEWA_021210          | <a href="#">PiroPlasmaDB</a> |
| <i>Theileria</i>       | <i>orientalis</i>     | TOT_020000374        | <a href="#">PiroPlasmaDB</a> |
| <i>Toxoplasma</i>      | <i>gondii</i>         | yjq463               | <a href="#">ToxoDB</a>       |
| <i>Vitrella</i>        | <i>brassicaformis</i> | Vbra_12313           | <a href="#">CryptoDB</a>     |

**Supplementary Table 2:** Details on the 48 co-immunoprecipitation proteins identified in both PfPPP8-smV5 and PfCINCH-smMyc consensus lists.

**SUPPLEMENTARY TABLE 2**

| Gene Symbol     | MWT(kDa) | Annotation                                                   | Unique          | Total           | Unique         | Total          | Unique          | Total           | Intensity Control | Intensity PfPPP8 | Intensity PfCINCH | Lowest value |
|-----------------|----------|--------------------------------------------------------------|-----------------|-----------------|----------------|----------------|-----------------|-----------------|-------------------|------------------|-------------------|--------------|
|                 |          |                                                              | Control (Run 1) | Control (Run 1) | PfPPP8 (Run 1) | PfPPP8 (Run 1) | PfCINCH (Run 1) | PfCINCH (Run 1) |                   |                  |                   |              |
| Pf3D7_0407800   | 229.98   | protein CINCH                                                | 0               | 0               | 91             | 351            | 89              | 294             | 0                 | 4.10E+07         | 6.10E+07          | 4.10E+07     |
| Pf3D7_0704100   | 425      | basal complex transmembrane protein 2                        | 0               | 0               | 89             | 203            | 67              | 143             | 0                 | 1.30E+07         | 1.30E+07          | 1.30E+07     |
| Pf3D7_1018200   | 253.95   | serine/threonine protein phosphatase 8, putative (PfPPP8)    | 0               | 0               | 92             | 308            | 42              | 95              | 0                 | 1.10E+08         | 1.30E+07          | 1.30E+07     |
| Pf3D7_1351700   | 151.42   | inner membrane complex protein 1f, putative                  | 0               | 0               | 78             | 317            | 68              | 227             | 0                 | 4.80E+07         | 3.20E+07          | 3.20E+07     |
| Pf3D7_1436200   | 270.31   | basal complex protein 1                                      | 0               | 0               | 75             | 191            | 50              | 97              | 0                 | 2.10E+07         | 1.00E+07          | 1.00E+07     |
| Pf3D7_0704300   | 217.36   | protein BLEB                                                 | 0               | 0               | 50             | 128            | 37              | 78              | 0                 | 9.00E+06         | 8.10E+06          | 8.10E+06     |
| Pf3D7_1014900   | 267.82   | conserved Plasmodium protein, unknown function               | 0               | 0               | 44             | 87             | 16              | 20              | 0                 | 3.10E+06         | 6.60E+05          | 6.60E+05     |
| Pf3D7_1229800   | 270.61   | myosin J, putative                                           | 0               | 0               | 36             | 67             | 31              | 53              | 0                 | 2.60E+06         | 2.50E+06          | 2.50E+06     |
| Pf3D7_1435600   | 210.58   | conserved Plasmodium protein, unknown function               | 0               | 0               | 28             | 50             | 17              | 28              | 0                 | 1.50E+06         | 1.30E+06          | 1.30E+06     |
| Pf3D7_0304100   | 61.73    | inner membrane complex protein 1e, putative                  | 0               | 0               | 23             | 89             | 19              | 50              | 0                 | 1.30E+08         | 3.70E+06          | 3.70E+06     |
| Pf3D7_0611600   | 76.62    | basal complex transmembrane protein 1                        | 0               | 0               | 20             | 60             | 21              | 41              | 0                 | 4.40E+06         | 3.70E+06          | 3.70E+06     |
| Pf3D7_1341500   | 58.81    | Inner membrane complex suture component, putative            | 0               | 0               | 21             | 47             | 13              | 24              | 0                 | 2.60E+06         | 2.20E+06          | 2.20E+06     |
| Pf3D7_1031200   | 41.42    | MORN repeat-containing protein 1                             | 0               | 0               | 14             | 43             | 14              | 28              | 0                 | 7.60E+06         | 4.20E+06          | 4.20E+06     |
| Pf3D7_0506900   | 86.6     | Rhomboid protease ROM4                                       | 0               | 0               | 17             | 30             | 10              | 13              | 0                 | 6.70E+05         | 1.30E+06          | 1.30E+06     |
| Pf3D7_0525800   | 34.32    | inner membrane complex protein 1g, putative                  | 0               | 0               | 17             | 136            | 16              | 96              | 0                 | 7.50E+07         | 5.10E+07          | 5.50E+07     |
| Pf3D7_1345600   | 43.19    | inner membrane complex protein                               | 0               | 0               | 16             | 74             | 12              | 35              | 0                 | 7.40E+06         | 6.90E+06          | 6.90E+06     |
| Pf3D7_0214700   | 35.68    | conserved Plasmodium protein, unknown function (Pf3D7_02147) | 0               | 0               | 15             | 24             | 13              | 17              | 0                 | 1.30E+06         | 1.20E+06          | 1.20E+06     |
| Pf3D7_1126700   | 110.05   | Autophagy-related protein 23, putative                       | 0               | 0               | 14             | 23             | 9               | 13              | 0                 | 9.00E+05         | 6.30E+05          | 6.30E+05     |
| Pf3D7_1342600   | 92.22    | Myosin-A                                                     | 0               | 0               | 12             | 25             | 13              | 21              | 0                 | 7.00E+05         | 1.40E+06          | 7.00E+05     |
| Pf3D7_0515700   | 51.77    | Glideosome-associated protein 40                             | 0               | 0               | 14             | 29             | 8               | 14              | 0                 | 3.30E+06         | 1.70E+06          | 1.70E+06     |
| Pf3D7_0618000   | 92.7     | conserved Plasmodium protein, unknown function               | 0               | 0               | 11             | 18             | 11              | 17              | 0                 | 1.20E+06         | 1.80E+06          | 1.20E+06     |
| Pf3D7_1019100   | 229.03   | Unknown, also pulled down in CINCH IP                        | 0               | 0               | 11             | 13             | 4               | 4               | 0                 | 1.60E+05         | 6.80E+04          | 6.80E+04     |
| Pf3D7_1003600   | 32.63    | inner membrane complex protein 1c, putative                  | 0               | 0               | 12             | 74             | 10              | 33              | 0                 | 2.00E+07         | 1.50E+07          | 1.50E+07     |
| Pf3D7_0320800   | 49.38    | ATP-dependent RNA helicase DDX6                              | 0               | 0               | 7              | 9              | 5               | 8               | 0                 | 4.10E+05         | 5.10E+05          | 4.10E+05     |
| Pf3D7_0806800   | 122.92   | Vacuolar proton translocating ATPase subunit A, putative     | 0               | 0               | 6              | 11             | 6               | 9               | 0                 | 2.60E+05         | 3.30E+05          | 2.60E+05     |
| Pf3D7_1229300   | 117.41   | conserved Plasmodium protein, unknown function               | 0               | 0               | 10             | 12             | 4               | 5               | 0                 | 1.70E+05         | 1.50E+05          | 1.50E+05     |
| Pf3D7_1315300   | 56.31    | conserved Plasmodium protein, unknown function               | 0               | 0               | 10             | 23             | 5               | 8               | 0                 | 1.30E+06         | 4.10E+05          | 4.10E+05     |
| Pf3D7_1227700   | 91.24    | conserved Plasmodium protein, unknown function               | 0               | 0               | 9              | 13             | 2               | 2               | 0                 | 2.70E+05         | 1.30E+06          | 2.70E+05     |
| Pf3D7_0822900   | 138.16   | conserved Plasmodium protein, unknown function               | 0               | 0               | 6              | 9              | 5               | 9               | 0                 | 2.80E+05         | 4.50E+05          | 2.80E+05     |
| Pf3D7_1304200.1 | 54.86    | CorA-like Mg2+ transporter protein, putative                 | 0               | 0               | 8              | 10             | 4               | 5               | 0                 | 3.10E+05         | 1.60E+05          | 1.60E+05     |
| Pf3D7_1142100   | 324.63   | conserved Plasmodium protein, unknown function               | 0               | 0               | 6              | 6              | 4               | 6               | 0                 | 7.50E+04         | 7.90E+04          | 7.50E+04     |
| Pf3D7_0423500   | 42.59    | glideosome associated protein with multiple membrane spans 2 | 0               | 0               | 7              | 64             | 6               | 38              | 0                 | 2.10E+07         | 1.60E+07          | 1.60E+07     |
| Pf3D7_1409400   | 30.52    | conserved Plasmodium protein, unknown function               | 0               | 0               | 8              | 64             | 7               | 25              | 0                 | 2.00E+07         | 1.10E+07          | 1.10E+07     |
| Pf3D7_0914400   | 28.4     | conserved Plasmodium protein, unknown function               | 0               | 0               | 7              | 37             | 7               | 23              | 0                 | 3.40E+06         | 2.30E+06          | 2.30E+06     |
| Pf3D7_1222700   | 23.62    | Glideosome-associated protein 45                             | 0               | 0               | 8              | 20             | 4               | 12              | 0                 | 1.90E+06         | 1.30E+06          | 1.30E+06     |
| Pf3D7_0217500   | 60.76    | Calcium-dependent protein kinase 1                           | 0               | 0               | 6              | 11             | 6               | 7               | 0                 | 3.50E+05         | 3.10E+05          | 3.10E+05     |
| Pf3D7_1429800   | 159.87   | Coatamer beta subunit, putative                              | 0               | 0               | 2              | 2              | 2               | 2               | 0                 | 1.40E+04         | 8.20E+04          | 1.40E+04     |
| Pf3D7_1308000   | 99.95    | conserved Plasmodium protein, unknown function               | 0               | 0               | 6              | 11             | 3               | 5               | 0                 | 8.30E+04         | 5.30E+04          | 5.30E+04     |
| Pf3D7_1446600   | 19.3     | Centrin-2                                                    | 0               | 0               | 5              | 10             | 6               | 7               | 0                 | 6.00E+05         | 3.30E+05          | 3.30E+05     |
| Pf3D7_0109000   | 25.46    | Photosensitized INA-labeled protein PHIL1, putative          | 0               | 0               | 6              | 45             | 3               | 7               | 0                 | 2.80E+06         | 1.20E+06          | 1.20E+06     |
| Pf3D7_1012900   | 43.49    | Autophagy-related protein 18, putative                       | 0               | 0               | 5              | 7              | 6               | 10              | 0                 | 2.60E+05         | 2.00E+06          | 2.60E+05     |
| Pf3D7_1423700   | 183.46   | conserved Plasmodium protein, unknown function               | 0               | 0               | 5              | 8              | 4               | 6               | 0                 | 9.60E+04         | 1.30E+05          | 9.60E+04     |
| Pf3D7_1356800   | 475.42   | Serine/threonine protein kinase, putative                    | 0               | 0               | 5              | 6              | 3               | 3               | 0                 | 4.40E+04         | 2.70E+04          | 2.70E+04     |
| Pf3D7_0522600   | 55.53    | Inner membrane complex protein                               | 0               | 0               | 4              | 7              | 4               | 5               | 0                 | 9.90E+05         | 1.70E+05          | 1.70E+05     |
| Pf3D7_1037500   | 81.47    | Dynamin-like protein                                         | 0               | 0               | 3              | 4              | 3               | 3               | 0                 | 6.30E+04         | 9.80E+04          | 6.30E+04     |
| Pf3D7_1310700   | 16.52    | RNA-binding protein                                          | 0               | 0               | 4              | 45             | 3               | 26              | 0                 | 1.40E+07         | 1.10E+07          | 1.10E+07     |
| Pf3D7_1246400   | 23.48    | Myosin A tail domain interacting protein                     | 0               | 0               | 3              | 7              | 4               | 10              | 0                 | 3.30E+05         | 9.00E+05          | 3.30E+05     |
| Pf3D7_1323100   | 21.59    | 60S ribosomal protein L6, putative                           | 0               | 0               | 3              | 5              | 3               | 5               | 0                 | 1.70E+05         | 2.70E+05          | 1.70E+05     |

**Supplementary Table 3: Primers and Synthetic DNA blocks used in this study.**

**SUPPLEMENTARY TABLE 3**

| Oligo Name             | Oligo Sequence                                                                                                                                                                                                                                                                                                                                                                                                                                                                                                                                                                                                                                                                                                                                                                                                                                                                                                                                                                                     |                                                                                                                                                                                                                                                                                                                                                                                                                                                                                                                                                                                                                                                                                                                                                                                                                              |
|------------------------|----------------------------------------------------------------------------------------------------------------------------------------------------------------------------------------------------------------------------------------------------------------------------------------------------------------------------------------------------------------------------------------------------------------------------------------------------------------------------------------------------------------------------------------------------------------------------------------------------------------------------------------------------------------------------------------------------------------------------------------------------------------------------------------------------------------------------------------------------------------------------------------------------------------------------------------------------------------------------------------------------|------------------------------------------------------------------------------------------------------------------------------------------------------------------------------------------------------------------------------------------------------------------------------------------------------------------------------------------------------------------------------------------------------------------------------------------------------------------------------------------------------------------------------------------------------------------------------------------------------------------------------------------------------------------------------------------------------------------------------------------------------------------------------------------------------------------------------|
| oIDD56                 | ACACCTTATGCTTCGGCTCGTATGTTGTG                                                                                                                                                                                                                                                                                                                                                                                                                                                                                                                                                                                                                                                                                                                                                                                                                                                                                                                                                                      |                                                                                                                                                                                                                                                                                                                                                                                                                                                                                                                                                                                                                                                                                                                                                                                                                              |
| oDD512                 | TGCACCTTGAAGCGCATGAACCTC                                                                                                                                                                                                                                                                                                                                                                                                                                                                                                                                                                                                                                                                                                                                                                                                                                                                                                                                                                           |                                                                                                                                                                                                                                                                                                                                                                                                                                                                                                                                                                                                                                                                                                                                                                                                                              |
| oDD2933                | CTGCTGCTGAGTACTATCAAGTC                                                                                                                                                                                                                                                                                                                                                                                                                                                                                                                                                                                                                                                                                                                                                                                                                                                                                                                                                                            |                                                                                                                                                                                                                                                                                                                                                                                                                                                                                                                                                                                                                                                                                                                                                                                                                              |
| oDD3927                | GCTCTAAAACTgagatggtttgactcgtatcAATAATTATATACTTAATGAAATATGTGC                                                                                                                                                                                                                                                                                                                                                                                                                                                                                                                                                                                                                                                                                                                                                                                                                                                                                                                                       |                                                                                                                                                                                                                                                                                                                                                                                                                                                                                                                                                                                                                                                                                                                                                                                                                              |
| oDD3928                | TATAAATTTGaatcgtgtaaacactctcaGTTTTAGAGCTGAAAAAGCAAGTTAAAAATAAG                                                                                                                                                                                                                                                                                                                                                                                                                                                                                                                                                                                                                                                                                                                                                                                                                                                                                                                                     |                                                                                                                                                                                                                                                                                                                                                                                                                                                                                                                                                                                                                                                                                                                                                                                                                              |
| oDD4293                | GCTCTAAAACTgattttgctgctcAATAATTATATACTTAATGAAATATG                                                                                                                                                                                                                                                                                                                                                                                                                                                                                                                                                                                                                                                                                                                                                                                                                                                                                                                                                 |                                                                                                                                                                                                                                                                                                                                                                                                                                                                                                                                                                                                                                                                                                                                                                                                                              |
| oDD4571                | TATAAATTTGatgltgagaaatcacaagtGTTTTAGAGCTGAAAAAGCAAGTTAA                                                                                                                                                                                                                                                                                                                                                                                                                                                                                                                                                                                                                                                                                                                                                                                                                                                                                                                                            |                                                                                                                                                                                                                                                                                                                                                                                                                                                                                                                                                                                                                                                                                                                                                                                                                              |
| oDD4572                | GCTCTAAAACTgtgtatlltclaaacatAATAATTATATACTTAATGAAATATG                                                                                                                                                                                                                                                                                                                                                                                                                                                                                                                                                                                                                                                                                                                                                                                                                                                                                                                                             |                                                                                                                                                                                                                                                                                                                                                                                                                                                                                                                                                                                                                                                                                                                                                                                                                              |
| oDD4616                | gtgctcgagATGGTTTCGAAAAGGAGAGGAGAT                                                                                                                                                                                                                                                                                                                                                                                                                                                                                                                                                                                                                                                                                                                                                                                                                                                                                                                                                                  |                                                                                                                                                                                                                                                                                                                                                                                                                                                                                                                                                                                                                                                                                                                                                                                                                              |
| oDD4617                | cgaccgtacttactACTTATAGAGTTTCATCCAT                                                                                                                                                                                                                                                                                                                                                                                                                                                                                                                                                                                                                                                                                                                                                                                                                                                                                                                                                                 |                                                                                                                                                                                                                                                                                                                                                                                                                                                                                                                                                                                                                                                                                                                                                                                                                              |
| oDD4682                | TATTgTACCTTGAAATCATTAAAGAG                                                                                                                                                                                                                                                                                                                                                                                                                                                                                                                                                                                                                                                                                                                                                                                                                                                                                                                                                                         |                                                                                                                                                                                                                                                                                                                                                                                                                                                                                                                                                                                                                                                                                                                                                                                                                              |
| oDD4683                | AAACCTCTTAATGATTTCAAGGTAc                                                                                                                                                                                                                                                                                                                                                                                                                                                                                                                                                                                                                                                                                                                                                                                                                                                                                                                                                                          |                                                                                                                                                                                                                                                                                                                                                                                                                                                                                                                                                                                                                                                                                                                                                                                                                              |
| oDD4688                | CTAATATATTATCGAGACcgcgggatatacaggcctGATGAAAAAGGAGATAATGAAAAAG                                                                                                                                                                                                                                                                                                                                                                                                                                                                                                                                                                                                                                                                                                                                                                                                                                                                                                                                      |                                                                                                                                                                                                                                                                                                                                                                                                                                                                                                                                                                                                                                                                                                                                                                                                                              |
| oDD4689                | GGcGGIAgGCAITGCATITGCATITTTAetTGAgTCCTTgATgTTATTgTCICCaCgCAgctcTtgAgtGcTAAcATTTCCTTTGATCCTTG                                                                                                                                                                                                                                                                                                                                                                                                                                                                                                                                                                                                                                                                                                                                                                                                                                                                                                       |                                                                                                                                                                                                                                                                                                                                                                                                                                                                                                                                                                                                                                                                                                                                                                                                                              |
| oDD4690                | CCATccatggtGAgTCgTTgATcTTTCcAAIgcTtTcTgAAITgATcTtCcGcTcTIGGcTtCcGGAcTcGcGGIAgGCAITGCATITGCATITTT                                                                                                                                                                                                                                                                                                                                                                                                                                                                                                                                                                                                                                                                                                                                                                                                                                                                                                   |                                                                                                                                                                                                                                                                                                                                                                                                                                                                                                                                                                                                                                                                                                                                                                                                                              |
| oDD4691                | CTCCTTTTTCATCaggcctgataccggcgGTCTCGATAAATATTAGAGATGGTC                                                                                                                                                                                                                                                                                                                                                                                                                                                                                                                                                                                                                                                                                                                                                                                                                                                                                                                                             |                                                                                                                                                                                                                                                                                                                                                                                                                                                                                                                                                                                                                                                                                                                                                                                                                              |
| oDD4692                | CATCGCggcccaGACACCTTAATGATATGTGTGATTG                                                                                                                                                                                                                                                                                                                                                                                                                                                                                                                                                                                                                                                                                                                                                                                                                                                                                                                                                              |                                                                                                                                                                                                                                                                                                                                                                                                                                                                                                                                                                                                                                                                                                                                                                                                                              |
| oDD4693                | TATTgAAGGAAAAATTCAATTACA                                                                                                                                                                                                                                                                                                                                                                                                                                                                                                                                                                                                                                                                                                                                                                                                                                                                                                                                                                           |                                                                                                                                                                                                                                                                                                                                                                                                                                                                                                                                                                                                                                                                                                                                                                                                                              |
| oDD4694                | AAACTGTAATTAATTTTCCTTc                                                                                                                                                                                                                                                                                                                                                                                                                                                                                                                                                                                                                                                                                                                                                                                                                                                                                                                                                                             |                                                                                                                                                                                                                                                                                                                                                                                                                                                                                                                                                                                                                                                                                                                                                                                                                              |
| oDD4695                | TATTgCAAGTTGATAAAACATTA                                                                                                                                                                                                                                                                                                                                                                                                                                                                                                                                                                                                                                                                                                                                                                                                                                                                                                                                                                            |                                                                                                                                                                                                                                                                                                                                                                                                                                                                                                                                                                                                                                                                                                                                                                                                                              |
| oDD4696                | AAACTAATGTTCTTATCAACTTGC                                                                                                                                                                                                                                                                                                                                                                                                                                                                                                                                                                                                                                                                                                                                                                                                                                                                                                                                                                           |                                                                                                                                                                                                                                                                                                                                                                                                                                                                                                                                                                                                                                                                                                                                                                                                                              |
| oDD4699                | CATCGCggccgcCTTTATGTTAATGTTTTTTTTCACATG                                                                                                                                                                                                                                                                                                                                                                                                                                                                                                                                                                                                                                                                                                                                                                                                                                                                                                                                                            |                                                                                                                                                                                                                                                                                                                                                                                                                                                                                                                                                                                                                                                                                                                                                                                                                              |
| oDD4700                | GTATAACATTTCTAAAAGggcctgataccggcgCAAAATGCTCGAGAGCCTTAATAC                                                                                                                                                                                                                                                                                                                                                                                                                                                                                                                                                                                                                                                                                                                                                                                                                                                                                                                                          |                                                                                                                                                                                                                                                                                                                                                                                                                                                                                                                                                                                                                                                                                                                                                                                                                              |
| oDD4701                | CTCGAGCAATTTTCggcgggatatacaggcctCTTAGAAATGTTATACGAGATTTCTAAC                                                                                                                                                                                                                                                                                                                                                                                                                                                                                                                                                                                                                                                                                                                                                                                                                                                                                                                                       |                                                                                                                                                                                                                                                                                                                                                                                                                                                                                                                                                                                                                                                                                                                                                                                                                              |
| oDD4702                | GGCAgTCITtGATaTTITtGATgATgTtTaGAgTAcTGAATcIAGaAcGcTcTcGcAcTgIATgTtTcTcITTTTGAACATATAAAGCGATGAATTCAAAG                                                                                                                                                                                                                                                                                                                                                                                                                                                                                                                                                                                                                                                                                                                                                                                                                                                                                              |                                                                                                                                                                                                                                                                                                                                                                                                                                                                                                                                                                                                                                                                                                                                                                                                                              |
| oDD4703                | CCATccatgggATIGATAAaTaaTTTGcGAAcTTATTAgTTCaTcTAAcGcCITTCATgTcIGGGCAgTCITtGATaTtTTTtGATgAgT                                                                                                                                                                                                                                                                                                                                                                                                                                                                                                                                                                                                                                                                                                                                                                                                                                                                                                         |                                                                                                                                                                                                                                                                                                                                                                                                                                                                                                                                                                                                                                                                                                                                                                                                                              |
| oDD4925                | CGTAccegggttaCAGATCCTCTCGCTGATAAGTTTC                                                                                                                                                                                                                                                                                                                                                                                                                                                                                                                                                                                                                                                                                                                                                                                                                                                                                                                                                              |                                                                                                                                                                                                                                                                                                                                                                                                                                                                                                                                                                                                                                                                                                                                                                                                                              |
| oDD5007                | CAACGCCATTAATGCTGC                                                                                                                                                                                                                                                                                                                                                                                                                                                                                                                                                                                                                                                                                                                                                                                                                                                                                                                                                                                 |                                                                                                                                                                                                                                                                                                                                                                                                                                                                                                                                                                                                                                                                                                                                                                                                                              |
| oDD5078                | GTACAGGGTCTCGggagATTCTATAAACCTGTTAGGAATAAAGG                                                                                                                                                                                                                                                                                                                                                                                                                                                                                                                                                                                                                                                                                                                                                                                                                                                                                                                                                       |                                                                                                                                                                                                                                                                                                                                                                                                                                                                                                                                                                                                                                                                                                                                                                                                                              |
| oDD5079                | GTACAGGGTCTCGaglaTTAGGATATTTTATTCTTCAATAAAC                                                                                                                                                                                                                                                                                                                                                                                                                                                                                                                                                                                                                                                                                                                                                                                                                                                                                                                                                        |                                                                                                                                                                                                                                                                                                                                                                                                                                                                                                                                                                                                                                                                                                                                                                                                                              |
| oDD5398                | CATGCCATGGTAGGATAAAAGTAAAAAGAAAAATG                                                                                                                                                                                                                                                                                                                                                                                                                                                                                                                                                                                                                                                                                                                                                                                                                                                                                                                                                                |                                                                                                                                                                                                                                                                                                                                                                                                                                                                                                                                                                                                                                                                                                                                                                                                                              |
| oDD5839                | CTTTGAAAAATTTGCATACTAGAAAAAGTAATCTATATC                                                                                                                                                                                                                                                                                                                                                                                                                                                                                                                                                                                                                                                                                                                                                                                                                                                                                                                                                            |                                                                                                                                                                                                                                                                                                                                                                                                                                                                                                                                                                                                                                                                                                                                                                                                                              |
| oDD6010                | GATAGGATAAGTTTTGAATTTTTATTGTTAC                                                                                                                                                                                                                                                                                                                                                                                                                                                                                                                                                                                                                                                                                                                                                                                                                                                                                                                                                                    |                                                                                                                                                                                                                                                                                                                                                                                                                                                                                                                                                                                                                                                                                                                                                                                                                              |
| oDD6246                | GTACAGGGTCTCGCATGAGCAGAAGAACTGACGAACTC                                                                                                                                                                                                                                                                                                                                                                                                                                                                                                                                                                                                                                                                                                                                                                                                                                                                                                                                                             |                                                                                                                                                                                                                                                                                                                                                                                                                                                                                                                                                                                                                                                                                                                                                                                                                              |
| oDD6247                | GTACAGGGTCTCGCTTTCATGGAGGGTGCATTTAACTG                                                                                                                                                                                                                                                                                                                                                                                                                                                                                                                                                                                                                                                                                                                                                                                                                                                                                                                                                             |                                                                                                                                                                                                                                                                                                                                                                                                                                                                                                                                                                                                                                                                                                                                                                                                                              |
| oDD6248                | GTACAGGGTCTCGAAAGCTCGAGCACCACCAC                                                                                                                                                                                                                                                                                                                                                                                                                                                                                                                                                                                                                                                                                                                                                                                                                                                                                                                                                                   |                                                                                                                                                                                                                                                                                                                                                                                                                                                                                                                                                                                                                                                                                                                                                                                                                              |
| oDD6249                | GTACAGGGTCTCGCATGCGCTGCTGTGATGATG                                                                                                                                                                                                                                                                                                                                                                                                                                                                                                                                                                                                                                                                                                                                                                                                                                                                                                                                                                  |                                                                                                                                                                                                                                                                                                                                                                                                                                                                                                                                                                                                                                                                                                                                                                                                                              |
| oDD6292                | TATTGTGTTCTTCACTCCGTAT                                                                                                                                                                                                                                                                                                                                                                                                                                                                                                                                                                                                                                                                                                                                                                                                                                                                                                                                                                             |                                                                                                                                                                                                                                                                                                                                                                                                                                                                                                                                                                                                                                                                                                                                                                                                                              |
| oDD6293                | AAACATCACGGAGTGAATAGAACAC                                                                                                                                                                                                                                                                                                                                                                                                                                                                                                                                                                                                                                                                                                                                                                                                                                                                                                                                                                          |                                                                                                                                                                                                                                                                                                                                                                                                                                                                                                                                                                                                                                                                                                                                                                                                                              |
| oDD6294                | TATTGTTCATCACTTCGAAAGCAT                                                                                                                                                                                                                                                                                                                                                                                                                                                                                                                                                                                                                                                                                                                                                                                                                                                                                                                                                                           |                                                                                                                                                                                                                                                                                                                                                                                                                                                                                                                                                                                                                                                                                                                                                                                                                              |
| oDD6295                | AAACATGCTTTGCAAGTGAAGAAC                                                                                                                                                                                                                                                                                                                                                                                                                                                                                                                                                                                                                                                                                                                                                                                                                                                                                                                                                                           |                                                                                                                                                                                                                                                                                                                                                                                                                                                                                                                                                                                                                                                                                                                                                                                                                              |
| oDD6296                | TATTGTGCTTACATGTAAGACGA                                                                                                                                                                                                                                                                                                                                                                                                                                                                                                                                                                                                                                                                                                                                                                                                                                                                                                                                                                            |                                                                                                                                                                                                                                                                                                                                                                                                                                                                                                                                                                                                                                                                                                                                                                                                                              |
| oDD6297                | AAACTCGTCAACAATGAAGCAAC                                                                                                                                                                                                                                                                                                                                                                                                                                                                                                                                                                                                                                                                                                                                                                                                                                                                                                                                                                            |                                                                                                                                                                                                                                                                                                                                                                                                                                                                                                                                                                                                                                                                                                                                                                                                                              |
| oDD6358                | CATGCGGCCCGCAACATCAATATATATTTTTAATATATTGATAATTATAGTCTC                                                                                                                                                                                                                                                                                                                                                                                                                                                                                                                                                                                                                                                                                                                                                                                                                                                                                                                                             |                                                                                                                                                                                                                                                                                                                                                                                                                                                                                                                                                                                                                                                                                                                                                                                                                              |
| oDD6359                | GATCACAAATTTCCGCTGACTTGTTCAGGAGGCTTTGGATCCCGCATTAAATGTTATCCATTTTCTTTCTCT                                                                                                                                                                                                                                                                                                                                                                                                                                                                                                                                                                                                                                                                                                                                                                                                                                                                                                                           |                                                                                                                                                                                                                                                                                                                                                                                                                                                                                                                                                                                                                                                                                                                                                                                                                              |
| oDD6360                | GAGAGAAAAAGAAAAATGGATAACATATTAATCGGGATCCAAAGGCTCTGAAACAACTCAGGCCAAAAATG                                                                                                                                                                                                                                                                                                                                                                                                                                                                                                                                                                                                                                                                                                                                                                                                                                                                                                                            |                                                                                                                                                                                                                                                                                                                                                                                                                                                                                                                                                                                                                                                                                                                                                                                                                              |
| oDD6361                | CAGTCCGCTCATCTAGAGCGTCAAGAGTTCATCTCAAAGTTGTAATAATGCTTG                                                                                                                                                                                                                                                                                                                                                                                                                                                                                                                                                                                                                                                                                                                                                                                                                                                                                                                                             |                                                                                                                                                                                                                                                                                                                                                                                                                                                                                                                                                                                                                                                                                                                                                                                                                              |
| oDD6362                | CAAGCATATTATTACACTTAAAGATGAGCAACTGCTGACGCTTACGATG                                                                                                                                                                                                                                                                                                                                                                                                                                                                                                                                                                                                                                                                                                                                                                                                                                                                                                                                                  |                                                                                                                                                                                                                                                                                                                                                                                                                                                                                                                                                                                                                                                                                                                                                                                                                              |
| oDD6363                | CATGCCATGGTTCGGTAATCGCAGGATCTTCTTC                                                                                                                                                                                                                                                                                                                                                                                                                                                                                                                                                                                                                                                                                                                                                                                                                                                                                                                                                                 |                                                                                                                                                                                                                                                                                                                                                                                                                                                                                                                                                                                                                                                                                                                                                                                                                              |
| oDD6503                | CATGCCATGGATGGTAGCAAGGGCGAGG                                                                                                                                                                                                                                                                                                                                                                                                                                                                                                                                                                                                                                                                                                                                                                                                                                                                                                                                                                       |                                                                                                                                                                                                                                                                                                                                                                                                                                                                                                                                                                                                                                                                                                                                                                                                                              |
| oDD6504                | GGAGGCTCCCGACCCATCTTCTTCTGCTTACCGGG                                                                                                                                                                                                                                                                                                                                                                                                                                                                                                                                                                                                                                                                                                                                                                                                                                                                                                                                                                |                                                                                                                                                                                                                                                                                                                                                                                                                                                                                                                                                                                                                                                                                                                                                                                                                              |
| oDD6505                | CCCGTAATGCAGAAAGACATGGGCTGGGAGGCTCC                                                                                                                                                                                                                                                                                                                                                                                                                                                                                                                                                                                                                                                                                                                                                                                                                                                                                                                                                                |                                                                                                                                                                                                                                                                                                                                                                                                                                                                                                                                                                                                                                                                                                                                                                                                                              |
| oDD6506                | CATGGTACTTACTTGTACAGCTCTGCTCATGCCG                                                                                                                                                                                                                                                                                                                                                                                                                                                                                                                                                                                                                                                                                                                                                                                                                                                                                                                                                                 |                                                                                                                                                                                                                                                                                                                                                                                                                                                                                                                                                                                                                                                                                                                                                                                                                              |
| oDD6545                | CGATAAAAGTACGCTCTTGGGCGACTCTGTCAGAGGGGCACTACTCTGGAG                                                                                                                                                                                                                                                                                                                                                                                                                                                                                                                                                                                                                                                                                                                                                                                                                                                                                                                                                |                                                                                                                                                                                                                                                                                                                                                                                                                                                                                                                                                                                                                                                                                                                                                                                                                              |
| oDD6546                | CTCCAAGGAGTAGTGCCCTGTCGACGAAGTCCCAAGAAAGCACTTTATATCG                                                                                                                                                                                                                                                                                                                                                                                                                                                                                                                                                                                                                                                                                                                                                                                                                                                                                                                                               |                                                                                                                                                                                                                                                                                                                                                                                                                                                                                                                                                                                                                                                                                                                                                                                                                              |
| oDD6547                | CATGGGTCTGCGCATGAAATTTAAACAGCTGATGACGATAAAGAAAG                                                                                                                                                                                                                                                                                                                                                                                                                                                                                                                                                                                                                                                                                                                                                                                                                                                                                                                                                    |                                                                                                                                                                                                                                                                                                                                                                                                                                                                                                                                                                                                                                                                                                                                                                                                                              |
| oDD6548                | CATGGGTCTGCGGAGTAAACCAACCACTTAGAATAGGCC                                                                                                                                                                                                                                                                                                                                                                                                                                                                                                                                                                                                                                                                                                                                                                                                                                                                                                                                                            |                                                                                                                                                                                                                                                                                                                                                                                                                                                                                                                                                                                                                                                                                                                                                                                                                              |
| oDD6549                | CATGGGTCTGCTCGAGCACCACCACCAC                                                                                                                                                                                                                                                                                                                                                                                                                                                                                                                                                                                                                                                                                                                                                                                                                                                                                                                                                                       |                                                                                                                                                                                                                                                                                                                                                                                                                                                                                                                                                                                                                                                                                                                                                                                                                              |
| oDD6550                | CATGGGTCTGATGGCGCTGCTGTGATGATGATGATG                                                                                                                                                                                                                                                                                                                                                                                                                                                                                                                                                                                                                                                                                                                                                                                                                                                                                                                                                               |                                                                                                                                                                                                                                                                                                                                                                                                                                                                                                                                                                                                                                                                                                                                                                                                                              |
| oDD6637                | CTCTTAGTTCAATATGTAGAAAAATGATAGGAAG                                                                                                                                                                                                                                                                                                                                                                                                                                                                                                                                                                                                                                                                                                                                                                                                                                                                                                                                                                 |                                                                                                                                                                                                                                                                                                                                                                                                                                                                                                                                                                                                                                                                                                                                                                                                                              |
| oDD6638                | GACCTAAAGCATCATCTGTAATAAATG                                                                                                                                                                                                                                                                                                                                                                                                                                                                                                                                                                                                                                                                                                                                                                                                                                                                                                                                                                        |                                                                                                                                                                                                                                                                                                                                                                                                                                                                                                                                                                                                                                                                                                                                                                                                                              |
| oDD6762                | CAGCTTTCACCTTCGACA                                                                                                                                                                                                                                                                                                                                                                                                                                                                                                                                                                                                                                                                                                                                                                                                                                                                                                                                                                                 |                                                                                                                                                                                                                                                                                                                                                                                                                                                                                                                                                                                                                                                                                                                                                                                                                              |
| oDD6849                | GTACCTCTCTCTGATGTCGAGGGAAGGATTTTCAGAAATCTTAAATGCTCAGAAATAATGAGTTGTGTGATCG                                                                                                                                                                                                                                                                                                                                                                                                                                                                                                                                                                                                                                                                                                                                                                                                                                                                                                                          |                                                                                                                                                                                                                                                                                                                                                                                                                                                                                                                                                                                                                                                                                                                                                                                                                              |
| oDD6850                | ACGACGTTGAAAAACGCGCAGTCCGAAGCTTTCAAGAAATATCTGATCAACCCCGAAAGAAATATC                                                                                                                                                                                                                                                                                                                                                                                                                                                                                                                                                                                                                                                                                                                                                                                                                                                                                                                                 |                                                                                                                                                                                                                                                                                                                                                                                                                                                                                                                                                                                                                                                                                                                                                                                                                              |
| oDD6851                | GTACCTCTCTCTGATGTCGAGGGAAGGATTTTCAGAAATCTTAAATGCTCAGAAATAATGAGTTGTGTGATCG                                                                                                                                                                                                                                                                                                                                                                                                                                                                                                                                                                                                                                                                                                                                                                                                                                                                                                                          |                                                                                                                                                                                                                                                                                                                                                                                                                                                                                                                                                                                                                                                                                                                                                                                                                              |
| oDD6852                | ACGACGTTGAAAAACGCGCAGTCCGAAGCTTTCAAAACCAACCACTTAGAATAGGCCATTG                                                                                                                                                                                                                                                                                                                                                                                                                                                                                                                                                                                                                                                                                                                                                                                                                                                                                                                                      |                                                                                                                                                                                                                                                                                                                                                                                                                                                                                                                                                                                                                                                                                                                                                                                                                              |
| oDD6870                | CCCTCTATGGAATGAGGCCATGAGAATTGTTGAAAAAATAACAATAGTCAATAGCTCCCATGAATGTTCT                                                                                                                                                                                                                                                                                                                                                                                                                                                                                                                                                                                                                                                                                                                                                                                                                                                                                                                             |                                                                                                                                                                                                                                                                                                                                                                                                                                                                                                                                                                                                                                                                                                                                                                                                                              |
| oDD6871                | CTCATGGCTCTTTCATAGAGGGACATATATCATGATAAATATGTTTTCTGGAGACTATGTTGATAGAGG                                                                                                                                                                                                                                                                                                                                                                                                                                                                                                                                                                                                                                                                                                                                                                                                                                                                                                                              |                                                                                                                                                                                                                                                                                                                                                                                                                                                                                                                                                                                                                                                                                                                                                                                                                              |
| oDD7155                | CGTTGGATGAGATGAATCTTCACTTC                                                                                                                                                                                                                                                                                                                                                                                                                                                                                                                                                                                                                                                                                                                                                                                                                                                                                                                                                                         |                                                                                                                                                                                                                                                                                                                                                                                                                                                                                                                                                                                                                                                                                                                                                                                                                              |
| oDD7156                | GAGAAAGAAACACCGGATTTAAAGAACATAAAG                                                                                                                                                                                                                                                                                                                                                                                                                                                                                                                                                                                                                                                                                                                                                                                                                                                                                                                                                                  |                                                                                                                                                                                                                                                                                                                                                                                                                                                                                                                                                                                                                                                                                                                                                                                                                              |
| oDD7157                | GAAATTCGAAAGAACCTTTGAGACAATC                                                                                                                                                                                                                                                                                                                                                                                                                                                                                                                                                                                                                                                                                                                                                                                                                                                                                                                                                                       |                                                                                                                                                                                                                                                                                                                                                                                                                                                                                                                                                                                                                                                                                                                                                                                                                              |
| oDD7158                | CATACGGATCTTTAGATCTATGCC                                                                                                                                                                                                                                                                                                                                                                                                                                                                                                                                                                                                                                                                                                                                                                                                                                                                                                                                                                           |                                                                                                                                                                                                                                                                                                                                                                                                                                                                                                                                                                                                                                                                                                                                                                                                                              |
| oDD7160                | CAACAGATCAATGAGCTATCC                                                                                                                                                                                                                                                                                                                                                                                                                                                                                                                                                                                                                                                                                                                                                                                                                                                                                                                                                                              |                                                                                                                                                                                                                                                                                                                                                                                                                                                                                                                                                                                                                                                                                                                                                                                                                              |
| oDD7161                | GTAGTGCATCGCTCGCC                                                                                                                                                                                                                                                                                                                                                                                                                                                                                                                                                                                                                                                                                                                                                                                                                                                                                                                                                                                  |                                                                                                                                                                                                                                                                                                                                                                                                                                                                                                                                                                                                                                                                                                                                                                                                                              |
| <b>Gene Block Name</b> | <b>Gene Block Sequence</b>                                                                                                                                                                                                                                                                                                                                                                                                                                                                                                                                                                                                                                                                                                                                                                                                                                                                                                                                                                         |                                                                                                                                                                                                                                                                                                                                                                                                                                                                                                                                                                                                                                                                                                                                                                                                                              |
| CaPffMyoI              | CTGCTGACGCTCTACGATGAGGGCAGTCTCGATACCTTACATCAGCGATAAGGCGAAGCAGTCTTAAATATCTCTCTGACGCGCTGA<br>ACCATCTCGATACGATCTCTCTGCTGATGAGGACATCGACGAAAACACTCGTACGCTTTGAGGTCATGAATATTGTGAATAAGAAAGAA<br>AGATCTGCGGATTACCGAA<br>GAGCAGAAGAAGCTGACGCAATCAACAAGAGCTCCGCCATTCGGCAAGAGGAGACATCCAGGACAATGTATCAACAAGGAGTTGCA<br>CATCGAGCACATCATCGAGCAAGATCGAAAGGATCAAGAAAGCTGGTGAAGATCTACCGGGAGAAATACATCACGACCATAGGCTGAA<br>ACGCTGAACCAAGGACATCGCTTTAAAGATCTTCAAGATTTTCAAGGATGTTCTCAAGGTTGCTACGCGCAAGAAAAAGCACACTACACTCTCTCGAGA<br>AATTTCAAGATCTGCACTTAATGACATCTCTCTTGTGCGCAAGAGTCCGCAAGTTGTTCAAGATGAGGAAATGCTGGAAATGTCACCTT<br>ACCTGCAAGGTTCTCGCGAGCTCACGGCAACTTGTTCGACCTCTAGATTTTTCAACTTGTACAACCTGGCCGATGCAACAACAACAAAACT<br>TGTGCTCAGCGAGTGAATGAGGAAAGTTCGAGTACATTCACAACGCAAGGACATCCACATCGCAAGAAACAGGACATGACGATCAAC<br>GACAAGATATAAAGTACGTTCTTGGGCAACTGATCAACAGGGCAACTCTCTTGGAGGTCATCTGCTTATTGTTTGAAGTCTG<br>TGTTCGGAAGCACATCTACTCTTGGGGCAACCAGGACAGGTTGTTCACTACATCTACGGCTCTCAAGGACATAGAGATCAAGAT<br>CaPffPP8_Phosphat | GAAAGCAAACTGGAGTACATGGGCTCATCACTACAGGAGCAGGTCATCTCCGCCACTCGTACGAGCTGTTAATGAGATCAACGAGCT<br>CTTCGAGTTCTTTCGTTTGTGCGTCTTGTGCAAGAACTCTGATCAACGCGGCTCGGCGACAGCTATGACCATCTCGGACTAC<br>CAGCACATCCGCAACCCATCTGATCCCGCAGAACCTGACAGGTACAGCAACAAGAGTGAAGCAGTGAAGAAATCATTTACGACACT<br>TATGTCGGAACCTCAACTCAACACAGCTGACTGACTTGTGAGTGTGAAAGAACTGCTCCACTACGACATCATACCTCGAGGAGGGGA<br>ACATAACGTTAAAGTTCGGCAAGCAGGCTCAACGACTTTTGAAGAAACATGAGTGAAGTGTATCATCAGGGCCAGGAGTGGTCCAGG<br>AGGGCTACAAGTACTGTTAAGAGGAAAGTACTGACGCTTCTCGGCAAGAACTACTGCAATAAGTCAACAACAACCGCTGCAAGCGT<br>TTATCGTCAGAAAGAAACAACATCATTTTTCAATCAGATCTTAAAGTATCAGCATAAAGTCAACAGCTCATCAACAAGGAAACAAGCA<br>GGTGACGATCAACCACTCAGAAGTACAATTTCTCAACGACAAGTCCAAGCAAGAAAGCTCCCGCTTCTCAATAACAGCACTCACGA<br>AAAAGACGTTCCGCTCCACGGTACTTCAAGTGCAGAGGAGTTGAACGACCAATTAATACGCAACCCCTCATGAAG |
